# Supplementary material for: Male rat leukocyte population dynamics predict a window for intervention in aging
Source: eLife. 2022 May 4;11:e76808. doi: 10.7554/eLife.76808 (PMC9150891; doi:10.7554/eLife.76808)
Supplement: Source data 1. [file elife-76808-data1.xlsx]

## Sheet: Sheet1
Study ID	Date of Birth	Date of Death	LGL Pathology Score	Clinical/Necropsy (date; finding)
3m-1	2016-10-17	2017-07-18
3m-2	2016-10-17	2017-07-20		6/14/17 HL plantar lesions, mild; housed on soft bedding
3m-3	2016-10-17	2017-07-18		6/21/17 reported for low BCS, decreased feces, porphyrin staining; 7/18/17 2/5 BCS, alopecia of both FLs, gas-filled colon; gastric masses (L side - aggregates of whitish round masses, 5-7 mm in diameter; stomach saved in formalin); pale liver
3m-4	2017-01-04	2017-10-03
3m-5	2017-01-04	2017-10-03
3m-6	2017-01-04	2017-06-22		Mild autolysis; Tissues tacky; Brain tissue gelatinous - right hemisphere obliterated by 0.5 cm round lesion that expressed blood when removed from skull
4m-1	2016-09-17	2017-07-18
4m-2	2016-09-17	2017-07-20
4m-3	2016-09-17	2017-07-20
4m-4	2016-10-07	2017-08-15
4m-5	2016-10-07	2017-08-18		8/19/17 HL plantar lesions, mild; housed on soft bedding
4m-6	2016-10-07	2017-08-18		R corneal edema; mild head tilt
5m-1	2016-08-17	2017-02-14
5m-2	2016-08-17	2017-02-24
5m-3	2016-08-17	2017-03-06
5m-4	2016-10-14	2017-04-06
5m-5	2016-10-14	2017-04-13
5m-6	2016-10-14	2017-04-13
6m-1	2016-07-17	2017-02-14	0
6m-2	2016-07-17	2017-02-24	0
6m-3	2016-07-17	2017-03-10	0
6m-4	2016-08-07	2017-03-07	0
6m-5	2016-08-07	2017-03-10	0
6m-6	2016-08-07	2017-03-17	0
7m-1	2016-06-17	2017-02-14
7m-2	2016-06-17	2017-02-17
7m-3	2016-06-17	2017-03-06
7m-4	2016-09-04	2017-04-28
7m-5	2016-09-04	2017-05-04
7m-6	2016-09-04	2017-05-04
8m-1	2016-05-17	2017-02-14
8m-2	2016-05-17	2017-02-28
8m-3	2016-05-17	2017-03-06
8m-4	2016-06-07	2017-03-07
8m-5	2016-06-07	2017-03-10
8m-6	2016-06-07	2017-03-17
9m-1	2016-04-17	2017-02-17
9m-2	2016-04-17	2017-02-24
9m-3	2016-04-17	2017-03-06
9m-4	2016-06-14	2017-04-06
9m-5	2016-06-14	2017-04-13
9m-6	2016-06-14	2017-04-13
10m-1	2016-03-17	2017-02-17
10m-2	2016-03-17	2017-02-24
10m-3	2016-03-17	2017-02-28
10m-4	2016-04-07	2017-03-17
10m-5	2016-04-07	2017-03-10
10m-6	2016-04-07	2017-03-17
11m-1	2016-02-17	2017-03-06
11m-2	2016-02-17	2017-02-28
11m-3	2016-02-17	2017-03-07
11m-4	2016-05-04	2017-04-28
11m-5	2016-05-04	2017-04-28
11m-6	2016-05-04	2017-05-04
12m-1	2016-01-17	2017-02-17	0
12m-2	2016-01-17	2017-02-24	0
12m-3	2016-01-17	2017-03-06	0
12m-4	2016-02-07	2017-03-07	0
12m-5	2016-02-07	2017-03-10	0
12m-6	2016-02-07	2017-03-17	0
13m-1	2015-12-17	2017-07-18	0	6/21/17 HL plantar lesions, mild; housed on soft bedding
13m-2	2015-12-17	2017-07-20	0
13m-3	2015-12-17	2017-07-20	0
13m-4	2016-02-14	2017-09-12	0
13m-5	2016-02-14	2017-09-12	0	7/19/17 HL plantar lesions, mild; housed on soft bedding
13m-6	2016-02-14	2017-09-12	0
14m-1	2015-11-17	2017-07-20	0
14m-2	2015-11-17	2017-07-18	0	3/29/17 mild plantar lesions; housed on soft bedding; 7/18/17 hemoabdomen on necropsy (5-10 cc serosanguinous fluid, many clots) precluded any blood collection
14m-3	2015-11-17	2017-03-06	0
14m-4	2015-12-07	2017-08-15	3	5/17/17 HL plantar lesions, mild; housed on soft bedding; 8/15/17 splenomegaly 8-10x
14m-5	2015-12-07	2017-08-18	0	6/14/17 HL plantar lesions, mild; housed on soft bedding
14m-6	2015-12-07	2017-08-15	0	5/9/17 PUPD, resolved over several weeks; 7/19/17 HL plantar lesions, mild; housed on soft bedding
15m-1	2015-10-17	2017-07-18	0	6/14/17 HL plantar lesions, mild; housed on soft bedding
15m-2	2015-10-17	2017-07-18	0	4/3/17 eye bleed complication; 4/26/17 HL plantar lesions, mild; housed on soft bedding; 7/18/17 mod-servere porphyrin staining noted at necropsy
15m-3	2015-10-17	2017-05-18	2	Enlarged black pituitary on necropsy, 2x; minimal blood collected
15m-4	2016-01-04	2017-10-03	1	10/3/17 moderate porphyrin staining right eye
15m-5	2016-01-04	2017-10-03	3	7/5/17 HL plantar lesions, mild; housed on soft bedding; 10/3/17 splenomegaly 5x (9g), hepatomegaly, moderate petechiation of lungs, mild porphyrin staining left eye
15m-6	2016-01-04	2017-10-03	2	mild HL plantatr lesions; 6/20/17 porphyrin staining right eye
16m-1	2015-09-17	2017-07-18	0
16m-2	2015-09-17	2017-02-16	0
16m-3	2015-09-17	2017-07-03	0
16m-4	2015-10-07	2017-08-15	0	7/12/17 HL plantar lesions, mild; housed on soft bedding
16m-5	2015-10-07	2017-08-15	0	6/14/17 HL plantar lesions, mild; housed on soft bedding; 8/15/17 SC L abdominal round fatty mass approx 2.5 cm
16m-6	2015-10-07	2017-03-09	3
17m-1	2015-08-17	2017-02-17	0
17m-2	2015-08-17	2017-02-23	0
17m-3	2015-08-17	2017-02-28	0
17m-4	2015-10-14	2017-04-06	0
17m-5	2015-10-14	2017-04-06	0
17m-6	2015-10-14	2017-04-13	0
18m-1	2015-07-17	2017-02-09	0
18m-2	2015-07-17	2017-02-28	0
18m-4	2015-08-07	2017-03-07	0
18m-5	2015-08-07	2017-03-10	0
18m-6	2015-08-07	2017-03-17	0
19m-1	2015-06-17	2017-02-09	0
19m-2	2015-06-17	2017-02-17	3	1/20/17 intraorbital facial mass, diagnosed as abscess; treated and resolved; 2/17/17 splenomegaly 3-4x
19m-3	2015-06-17	2017-02-28	0
19m-4	2015-09-04	2017-04-28	0
19m-5	2015-09-04	2017-05-04	0	no bone marrow collected
19m-6	2015-09-04	2017-05-04	1	no bone marrow collected
20m-1	2015-05-17	2017-02-09	0	Enlarged L testicle, 2-3x
20m-2	2015-05-17	2017-02-23	1
20m-3	2015-05-17	2017-02-28	0
20m-4	2015-06-07	2017-03-07	0
20m-5	2015-06-07	2017-03-10	0
20m-6	2015-06-07	2017-03-17	0
21m-1	2015-04-17	2017-02-09	1
21m-2	2015-04-17	2017-02-23	0
21m-3	2015-04-17	2017-02-28	0
21m-4	2015-06-14	2017-04-06	0
21m-5	2015-06-14	2017-04-13	0
21m-6	2015-06-14	2017-04-13	1
22m-1	2015-03-17	2017-02-16	0
22m-2	2015-03-17	2017-02-28	3	Splenomegaly, 5x
22m-3	2015-03-17	2017-02-28	1
22m-4	2015-04-07	2017-03-07	1
22m-5	2015-04-07	2017-03-10	0
22m-6	2015-04-07	2017-03-17	2	Splenomegaly, 3x
23m-1	2015-02-17	2017-02-16	1	2/15/17 approx 20-25 mm round left mandible mass; meets study criteria for euthanasia/already scheduled for sac; at necropsy, suspect lipoma
23m-2	2015-02-17	2017-02-23	2
23m-3	2015-02-17	2017-02-28	0
23m-4	2015-05-04	2017-04-28	3
23m-5	2015-05-04	2017-04-28	0	Splenomegaly, 2x
24m-1	2015-01-17	2017-02-09	3	Splenomegaly noted at necropsy (7x)
24m-2	2015-01-17	2017-02-04	0	Dehydration reported on 2/2/17
24m-3	2015-01-17	2017-02-28	2	Splenomegaly, 3x
24m-4	2015-02-27	2017-03-07	0
24m-5	2015-02-27	2017-03-10	2	Splenomegaly, 3x
24m-6	2015-02-27	2017-03-17	1
25m-1	2015-01-07	2017-03-07	0
25m-2	2015-01-07	2017-03-10	0
25m-3	2015-01-07	2017-03-17	0
25m-4	2015-02-14	2017-04-06	2	3/23/17 approx 20 mm round left axillary mass; gait/locomotion unaffected
25m-5	2015-02-14	2017-04-06	3	2/5 BCS, pale (r/o anemia), 3x splenomegaly, pale mottled liver (r/o cirrhosis)
25m-6	2015-02-14	2017-04-13	0	Pituitary enlargement, 2x
26m-1	2015-01-14	2017-04-06	3	3/24/17 mild-mod plantar lesions; housed on soft bedding; 4/6/17 4x splenomegaly
26m-2	2015-01-14	2017-04-06	3	3/29/17 mild plantar lesions; housed on soft bedding; 4/6/17 globular, abnormally shaped spleen 3x, pale liver, pale lungs with petechiation
26m-3	2015-01-14	2017-04-13	3	Muscle wasting, 2x splenomegaly, pale mottled liver with rounded edges and 2x enlargement, 2x left testicle enlargement, 10 cc abdominal effusion, 2-3x black pituitary
26m-4	2015-02-04	2017-04-28	3	Small spleen with round pale lesion at distal end; liver mottled with rough surface
26m-5	2015-02-04	2017-05-04	1	4/26/17 mild plantar lesions noted on both hind feet; 5/4/17 Enlarged black pituitary gland, 2x
26m-6	2015-02-04	2017-04-26	0	4/20/17 serum yellow with low cell count r/o bilirubinemia, anemia; reported poor recovery from anesthesia for blood/tissue collection with chest compressions performed
27m-1	2014-11-07	2017-03-07	1	SC mass R axilla 2cmx2cm r/o fibroadenoma
27m-2	2014-11-07	2017-03-10	0	SC diffuse lobulated L inguinal mass 3cmx1.5cm; 2mm splenic plaque
27m-3	2014-11-07	2017-03-17	3	Severe urine staining, 1 cm round SC inguinal mass, 6-7 cm round L intrabdominal mass adherent to cranial pole of L kidney (r/o pheochromocytoma), pale mottled liver, enlarged L kidney, 3-4x splenomegaly, pituitary tumor, r/o Cushing's
27m-5	2015-02-02	2017-05-18	1
27m-6	2015-02-02	2017-05-18	2	Enlarged black pituitary, 2x
