# Supplementary material for: Male rat leukocyte population dynamics predict a window for intervention in aging
Source: eLife. 2022 May 4;11:e76808. doi: 10.7554/eLife.76808 (PMC9150891; doi:10.7554/eLife.76808)
Supplement: Source data 2. [file elife-76808-data2.xlsx]

## Sheet: Suppl Table 2
Rat study ID	Age (m)	BW (g)	T cells FoL	Neutrophils FoL	B cells FoL	NK cells FoL	monocytes FoL	Stimulated monocytes Frequency	CD8+ Freq of T cells	CD4+ Freq of T cells	CD25+ Freq of CD4+ T cells	CD4+/CD25+ T cells Frequency	CD4+/CD25- T cells Frequency	CD8+ T cells Frequency	Myeloid/lymphoid ratio	CD25+ Freq of T cells
3m-1	3.2	270	58.1	3.01	26.8	4.07	4.07	0.6	34.9474	65.0526	4.88691	1.74	33.8	19.3	0.0863212	0.0317907
3m-2	3.5	303	63.2	0.98	26.4	3.71	3.11	0.4	37.0103	62.9897	6.39846	2.44	35.7	22.7	0.0481192	0.0403037
3m-3	3.6	310	67.8	2.34	15.9	5.43	4.09	0.43	34.7555	65.2445	5.51738	2.33	39.8	22.6	0.0769662	0.0359979
3m-4	3.2	294	61.3	2.39	28.7	2.51	2.23	0.39	35.2008	64.7992	5.94059	2.21	35	20.4	0.0541563	0.0384945
3m-5	3.2	283	55.3	2.81	26.7	4.51	4.41	0.63	35.7524	64.2476	5.86809	1.94	31	18.5	0.090741	0.0377011
3m-6	3.5	311	59.6	2.21	28.3	2.83	2.97	0.42	36.8366	63.1634	7.21232	2.58	33.2	21.1	0.0617216	0.0455554
4m-1	4.5	313	62.6	1.31	23.9	6.12	2.78	0.36	38.1443	61.8557	6.38298	2.37	34.8	23.2	0.0480458	0.0394823
4m-2	4.5	314	63.5	2.45	23.2	4.48	2.73	0.8	38.9969	61.0031	7.52383	2.81	34.5	24.2	0.0655846	0.0458977
4m-3	4.5	317	62.4	3.82	19	4.08	5.43	0.64	37.1134	62.8866	6.364	2.39	35.2	22.5	0.1157	0.0400211
4m-4	4.1	269	59.4	2.68	29.6	2.17	2.32	0.81	37.7895	62.2105	6.49377	2.25	32.4	21.3	0.0637271	0.0403981
4m-5	4.2	401	63.8	3.03	25.5	3	1.9	0.34	35.7664	64.2336	5.84908	2.28	36.6	21.9	0.0570964	0.0375707
4m-6	4.5	288	70.4	1.85	19.3	2.63	2.83	0.27	34.6196	65.3804	5.75598	2.37	38.8	22.1	0.053612	0.0376328
5m-1	5.2	350	58.1	2.45	24.1	5.2	4.43	0.67	38.8542	61.1458	9.36864	3.14	30.4	21.7	0.0863844	0.0572853
5m-2	5.5	340	65.2	2.19	21.7	3.42	3.64	0.76	38.7526	61.2474	8.73944	3.36	35	24.7	0.0729628	0.0535269
5m-3	5.7	356	58.5	2.52	26.3	5.12	3.3	0.75	39.4792	60.5208	8.18708	2.74	30.8	22.2	0.0730649	0.0495489
5m-4	5.3	337	62.8	4.5	14.7	5.49	6.04	0.71	35.6757	64.3243	7.75809	2.85	33.9	20.7	0.135559	0.0499034
5m-5	5.5	369	58.7	3.12	24	3.86	4.71	0.56	37.0095	62.9905	7.56132	2.61	31.8	20.5	0.096927	0.0476291
5m-6	5.5	334	57.9	5.04	20.6	5.82	5.3	0.74	34.9257	65.0743	5.38353	1.89	33.2	19.1	0.131404	0.0350329
6m-1	6.3	385	58	3.06	24.4	4.91	4.82	0.62	37.5901	62.4099	7.97234	2.76	31.8	21.2	0.0973543	0.0497553
6m-2	6.5	360	59.2	2.79	27.6	3.73	3	0.87	37.551	62.449	8.80439	3.13	32.5	21.8	0.0735668	0.0549825
6m-3	6.7	376	59	3.32	24	3.98	4.72	0.59	36.722	63.278	9.15565	3.24	32.1	20.9	0.0992182	0.0579351
6m-4	6.2	370	63.3	3.76	23.8	4.25	1.55	0.39	35.9574	64.0426	7.14431	2.69	34.9	21.4	0.0623974	0.045754
6m-5	6.3	373	60.5	3.42	22.6	5.33	3.46	0.4	34.2408	65.7592	7.25725	2.72	34.8	19.8	0.082325	0.047723
6m-6	6.5	312	60.9	4.46	15.2	6.22	6.76	0.85	33.5895	66.4105	5.52855	2.01	34.4	18.7	0.146623	0.0367154
7m-1	7.2	363	54.1	2.85	26.8	4.71	6.14	0.87	37.0984	62.9016	8.29517	2.68	29.6	19.4	0.115173	0.0521779
7m-2	7.5	385	62.3	1.31	25.9	4.28	3.17	0.49	37.2529	62.7471	10.5906	3.92	33	22.3	0.0537413	0.0664532
7m-3	7.7	351	55.7	2.88	25.2	6.7	5.03	0.58	37.1901	62.8099	9.83856	3.28	30.1	20	0.0969178	0.0617959
7m-4	7.2	365	63.2	2.13	22.9	4.47	2.82	0.44	35.1967	64.8033	10.3659	4.04	34.9	21.5	0.059512	0.0671742
7m-5	7.5	365	60.6	4.69	18.7	4.94	5.48	0.63	37.1339	62.8661	9.70036	3.47	32.3	21.5	0.128205	0.0609824
7m-6	7.5	390	57.4	1.6	29.7	3.63	3.33	0.28	39.4381	60.5619	9.9246	3.25	29.5	21.7	0.0574231	0.0601053
8m-1	8.3	408	48.1	2.94	27.5	6.41	8.11	1.37	37.931	62.069	9.69456	2.71	25.3	17.5	0.151445	0.0601731
8m-2	8.6	419	57	3.38	29.2	2.66	3.51	0.69	41.641	58.359	11.5189	3.67	28.2	23.2	0.0853027	0.0672229
8m-3	8.7	426	57.5	4.35	23.1	4.79	4.46	0.65	36.4793	63.5207	9.4428	3.19	30.6	19.8	0.110786	0.0599813
8m-4	8.2	352	56.5	5.88	26.4	2.56	3.84	0.84	39.1631	60.8369	9.53595	2.99	28.4	20.6	0.123567	0.0580138
8m-5	8.3	348	52.7	5.23	18.2	9.9	6.36	1.15	35.845	64.155	7.74082	2.39	28.5	17.5	0.157673	0.0496612
8m-6	8.5	360	61.7	5.77	7.36	9.07	8.27	0.72	35.1127	64.8873	5.58767	1.86	31.4	18.3	0.188916	0.0362569
9m-1	9.5	411	65	0.38	25.8	5.49	1.37	0.081	38.3264	61.6736	10.1455	3.86	34.2	24.1	0.0190155	0.062571
9m-2	9.5	400	55.3	4.13	27.8	4.17	3.65	0.97	39.7739	60.2261	11.5189	3.65	28.1	21.4	0.100264	0.0693736
9m-3	9.7	378	48.9	4.84	24.6	6.74	7.28	0.91	36.875	63.125	14.2272	4.13	24.8	17.3	0.162388	0.0898094
9m-4	9.3	415	54.1	5.47	21.9	6.61	4.14	0.73	37.1882	62.8118	16.1191	4.7	24.5	17.7	0.125166	0.101247
9m-5	9.5	413	53.1	3.14	23.4	8.79	5.58	0.52	32.5882	67.4118	14.0369	4.15	25.5	14.7	0.108336	0.0946251
9m-6	9.5	409	46.8	4.91	26.4	5.62	7.35	0.65	35.1469	64.8531	16.2384	4.4	22.7	15.1	0.163791	0.105311
10m-1	10.5	404	57	4.15	21.9	6.23	5.56	0.74	37.1251	62.8749	12.0531	4.09	29.8	20.4	0.122753	0.0757838
10m-2	10.6	413	55.2	3.51	24.5	4.74	7.18	0.82	39.5036	60.4964	12.6531	4	27.6	21.1	0.13631	0.0765464
10m-3	10.6	407	65.9	2.96	13.8	8.12	4.54	0.36	30.8324	69.1676	10.1626	3.89	34.4	17.3	0.0895013	0.0702923
10m-4	10.2	382	52.5	2.63	26.3	6.89	6.32	0.57	35.6297	64.3703	12.8966	3.94	26.7	17.3	0.111098	0.0830159
10m-5	10.3	374	53.5	4.97	21.8	5.88	5.76	0.93	36.3147	63.6853	9.80432	3.04	28	18	0.143631	0.0624392
10m-6	10.5	423	55.3	2.69	26.4	5.67	4.97	0.6	35.6606	64.3394	10.7252	3.49	29	18.4	0.0945405	0.0690055
11m-1	11.7	431	54.6	5.65	24.9	3.22	5.68	0.54	38.3891	61.6109	15.2977	4.8	26.5	20	0.143496	0.0942507
11m-2	11.5	440	48.9	3.47	29.5	3.83	8.15	0.79	37.8741	62.1259	15.4872	4.44	24.2	18	0.150918	0.0962155
11m-3	11.7	409	56.2	6.56	16.5	8.82	5.42	1.18	33.2288	66.7712	10.4995	3.69	31.5	17.9	0.161433	0.0701063
11m-4	11.2	410	53.5	3.68	25.9	4.39	4.78	0.47	38.6062	61.3938	15.3374	4.45	24.6	18.7	0.106576	0.0941623
11m-5	11.2	412	49.5	3.27	27.6	6.21	5.51	0.53	38.3975	61.6025	11.8126	3.4	25.4	18.3	0.111751	0.0727687
11m-6	11.5	430	58.8	3.46	27.4	5.47	1.85	0.36	35.6701	64.3299	12.7681	4.59	31.3	20.3	0.0618523	0.0821373
12m-1	12.5	430	59.3	2.49	27	2.68	4.65	0.57	36.5226	63.4774	14.8718	5.29	30.4	21	0.0866487	0.0944022
12m-2	12.5	407	44.8	6.01	30.3	5.04	6.74	1.13	39.5661	60.4339	16.8378	4.31	21.2	17.1	0.173197	0.101757
12m-3	12.7	429	48.6	3.65	28.1	8.14	5.3	0.84	36.0707	63.9293	12.4236	3.65	25.7	16.9	0.115394	0.0794234
12m-4	12.1	422	59.5	3.54	23.9	4.29	4.93	0.56	31.9706	68.0294	12.6789	4.81	33	18.1	0.102976	0.086254
12m-5	12.2	443	57.7	3.26	24.1	4.31	5.23	0.56	39.1623	60.8377	12.9724	4.26	28.6	21.6	0.105098	0.0789212
12m-6	12.5	390	51	4.11	26.7	4.42	7.68	0.64	36.0084	63.9916	12.9857	3.93	26.3	17.4	0.151364	0.0830974
13m-1	13.3	373	49.6	4.35	22.4	7.95	7.72	1.07	36.5217	63.4783	15.2107	4.28	23.9	16.7	0.164353	0.0965548
13m-2	13.6	414	53.5	4.36	29.2	2.3	5.77	0.87	36.4681	63.5319	16.0329	5.08	26.6	18.7	0.129412	0.10186
13m-3	13.7	415	53	3.32	23.9	7.34	6.64	0.9	38.0901	61.9099	13.786	4.1	25.6	18.8	0.128917	0.085349
13m-4	13.3	413	55.2	5.75	18.3	7	6.14	0.76	39.4939	60.5061	12.2574	3.64	26.1	19.8	0.157143	0.0741647
13m-5	13.3	417	58.9	3.6	25	3.32	4.73	0.41	35.8277	64.1723	10.1192	3.31	29.4	18.6	0.100206	0.0649375
13m-6	13.5	406	52	4.35	27.7	4.94	5.23	0.52	35.362	64.638	8.62841	2.72	28.8	17.5	0.119329	0.0557723
14m-1	14.5	389	51.7	2.78	26	6.38	6.59	1.25	36.8143	63.1857	15.4872	4.67	25.5	18	0.126308	0.0978568
14m-2	14.5	436	46.4	2.86	33.9	3.61	7.71	0.63	39.4737	60.5263	19.917	5.12	20.6	17.4	0.133476	0.12055
14m-3	14.7	420	46.7	7.35	12.9	14.6	8.82	1.94	33.2616	66.7384	13.5524	3.82	24.4	14.5	0.24407	0.0904463
14m-4	14.2	456	42.7	6.06	29.1	4.69	8.15	1.49	34.5692	65.4308	13.0928	3.25	21.6	13.5	0.205256	0.0856671
14m-5	14.3	426	43	5.73	22.5	8.12	9.78	0.98	36.6228	63.3772	16.9928	4.09	20	14.3	0.223988	0.107696
14m-6	14.5	450	38.3	8.59	12.8	15.7	14.1	1.36	38.09	61.91	16.7695	3.51	17.5	13.3	0.36003	0.10382
15m-1	15.3	401	45.8	4.45	29.9	4.69	8.57	1.06	35.6092	64.3908	18.1443	4.95	22.3	15.5	0.175146	0.116833
15m-2	15.6	430	47.9	3.01	31.7	4.58	7.56	0.7	35.1295	64.8705	17.7503	5.16	23.9	16.3	0.13388	0.115147
15m-3	15.7	438	48	3.79	31.4	3.92	5.91	1.12	40.1042	59.8958	16.7008	4.49	22.5	18.5	0.129861	0.100031
15m-4	15.2	436	53.9	3.93	21.1	5.24	7.29	0.85	38.121	61.879	16.0164	4.8	25.3	19	0.150424	0.0991081
15m-5	15.5	418	46.5	7.83	18.3	7.58	10.1	0.73	35.3698	64.6302	18.1443	4.93	22.3	15.4	0.257806	0.117267
15m-6	15.5	421	46.3	6.34	22.9	7.52	8.21	0.97	39.6677	60.3323	20.743	5.4	20.7	17.7	0.202294	0.125147
16m-1	16.3	436	43.9	3.93	33.4	4.78	7.43	1.02	34.7134	65.2866	20.3723	5.34	20.8	14.4	0.150828	0.133004
16m-2	16.5	388	51.2	4.73	19.3	5.89	5.97	4.2	35.5072	64.4928	15.7246	4.88	26.2	17.6	0.195052	0.101412
16m-3	16.7	448	49.8	3.44	27.3	5.3	7.35	0.81	36.1925	63.8075	17.5745	5.21	24.4	17.2	0.140777	0.112139
16m-4	16.2	434	55	4.01	22.1	3.67	7.86	1.1	34.2362	65.7638	16.1523	5.23	27.2	17.4	0.160579	0.106223
16m-5	16.3	431	54.7	4.1	20.1	5.19	7.86	1.12	32.9776	67.0224	18.0041	6	27.3	16.9	0.16352	0.120668
17m-1	17.5	452	52.3	4.98	21.9	5.89	6.18	1.7	37.3134	62.6866	19.6484	5.86	23.9	18.3	0.160569	0.123169
17m-2	17.6	414	47.5	6.37	19.6	6.96	8.97	2.44	34.6681	65.3319	17.7503	5.06	23.5	15.6	0.240076	0.115966
17m-3	17.6	453	52	5.79	11	10.9	10.9	1.26	32.4607	67.5393	14.4913	4.75	27.9	16.1	0.242896	0.0978729
17m-4	17.3	441	56.4	7.17	15.1	4.9	7.45	0.86	35.0978	64.9022	19.5046	6	24.8	17.2	0.202618	0.126589
17m-5	17.3	452	49.2	6.89	17.2	6.56	8.92	1.88	38.0266	61.9734	20.3723	5.41	21.2	16.9	0.242462	0.126254
17m-6	17.5	447	47.8	4.82	15.5	13.6	9.57	0.82	35.7536	64.2464	19.6687	5.32	21.7	15.6	0.197789	0.126365
18m-1	18.3	399	38.3	8.37	21.2	8.7	15	0.96	29.0562	70.9438	18.0311	4.47	20.3	10.5	0.356745	0.127919
18m-2	18.6	474	51.8	6.09	18.4	6.07	8.53	1.76	36.8586	63.1414	19.4416	5.86	24.3	18.3	0.214763	0.122757
18m-4	18.2	418	46.8	6	23.8	6.07	8.46	0.65	40.0431	59.9569	16.2551	4.13	21.2	17.4	0.197078	0.0974609
18m-5	18.3	418	48.8	6.64	26.1	4.61	6.35	0.83	36.6705	63.3295	18.1631	4.67	21	15.4	0.173815	0.115026
18m-6	18.6	413	52	3.41	31	4.76	4.49	0.61	35.6688	64.3312	16.7695	5.13	25.5	17.5	0.096969	0.107881
19m-1	19.3	367	52.8	7.12	18.4	4.17	7.48	1.59	34.7919	65.2081	19.3952	6	25	17.2	0.214807	0.126472
19m-2	19.5	409	43.3	5.04	12.9	18	11.8	1.57	41.4634	58.5366	16.5971	3.65	18.3	16.2	0.248113	0.0971536
19m-3	19.6	456	51.5	4.29	5.56	13.7	13.5	0.8	28.4958	71.5042	17.0455	5.73	27.9	13.8	0.262719	0.121882
19m-4	19.2	440	50.5	4.23	18.4	8.47	8.46	1.08	34.8735	65.1265	21.3843	6.18	22.7	16	0.177976	0.139268
19m-5	19.5	409	49.9	7.73	8.09	12.2	10.6	1.26	32.9227	67.0773	18.53	5.33	23.5	14.7	0.2791	0.124294
19m-6	19.5	413	44.6	7.08	21	4.9	11.5	1.49	31.9283	68.0717	18.5759	5.2	22.7	13.5	0.284681	0.126449
20m-1	20.3	431	45.7	9.72	11.6	4.38	14.1	3.26	36.246	63.754	14.9331	3.92	22.3	15.4	0.43904	0.0952043
20m-2	20.6	375	49.2	4.87	9.66	13.5	13.5	2.47	30.042	69.958	18.6143	5.9	25.8	14.1	0.288004	0.130222
20m-3	20.6	426	54.3	4.52	7.7	11.5	11.8	1.56	32.0419	67.9581	16.8912	5.74	28.3	16.6	0.243265	0.114789
20m-4	20.2	424	57.5	3.92	18	3.74	6.93	2.11	30.5585	69.4415	12.115	4.48	32.5	16.7	0.163554	0.0841283
20m-5	20.3	491	61.6	7.35	8.49	4.91	7.78	1.51	33.2147	66.7853	15.2107	5.12	28.6	17.2	0.221867	0.101585
20m-6	20.6	472	44.2	7.8	10.5	9.92	13.1	1.85	35.5234	64.4766	15.0515	3.73	21.1	14.1	0.352058	0.0970473
21m-1	21.3	398	55	7.46	9.25	4.44	9.99	2.08	34.9504	65.0496	18.905	5.93	25.5	17.5	0.284321	0.122976
21m-2	21.6	407	59.3	3.69	17	3.65	7.94	1.43	36.4995	63.5005	21.4508	7.32	26.8	20.3	0.163352	0.136214
21m-3	21.6	405	71.5	4.9	11.3	3.73	3.28	1.32	29.6257	70.3743	16.4948	7.53	38.1	19.8	0.109789	0.116081
21m-4	21.3	411	55.5	7.32	7.76	7.3	11	1.45	31.3797	68.6203	22.0954	6.66	23.4	14.3	0.280187	0.151619
21m-5	21.5	418	52.2	7.68	12.4	7.93	10	1.28	28.2511	71.7489	22.3029	7.21	25	13.1	0.261409	0.160021
21m-6	21.5	427	55.1	7.91	5.15	8.08	12.8	2.04	28.7081	71.2919	13.4635	4.31	27.7	13.2	0.332943	0.0959839
22m-1	22.6	374	53.4	7.4	9.08	6.7	9.82	3.13	31.7328	68.2672	19.5021	6.57	27.1	16.2	0.29416	0.133135
22m-2	22.6	414	39.2	6.28	9.75	20.8	14.5	1.78	34.9892	65.0108	21.4435	4.83	17.7	12.7	0.323441	0.139406
22m-3	22.6	410	48.9	5.94	12.4	5.58	14	2.65	31.0669	68.9331	15.4959	4.83	26.4	14.5	0.337769	0.106818
22m-4	22.2	406	49.9	9.41	8.84	7.33	11.4	1.81	33.4826	66.5174	18.6722	5.35	23.2	14.9	0.342364	0.124203
22m-5	22.3	392	48.7	4.24	16.7	11.8	9.15	1.25	31.7287	68.2713	18.8406	5.52	23.8	14.1	0.189637	0.128627
22m-6	22.6	451	37.5	8.37	9.82	14.3	22.3	1.28	39.7674	60.2326	15.425	2.85	15.7	12.8	0.5185	0.0929086
23m-1	23.5	458	49.6	6.53	7.53	12.4	12	2.08	27.1855	72.8145	16.4071	5.37	27.3	12.6	0.296419	0.119467
23m-2	23.5	397	66.1	5.71	8.36	3.74	6.75	2.36	24.3902	75.6098	13.2308	6.1	39.9	15.2	0.189514	0.100038
23m-3	23.6	388	54.7	4.39	9.7	7.22	14.1	1.94	27.9787	72.0213	17.6166	6.29	29.5	14.4	0.285256	0.126877
23m-4	23.3	413	42.1	5.87	11.9	11.6	14.4	1.09	33.683	66.317	24.0951	5.58	17.6	12.2	0.32561	0.159792
23m-5	23.3	407	57.2	4.94	12.8	4.72	10.2	1.2	33.8043	66.1957	18.0124	6.06	27.6	17.8	0.218683	0.119234
24m-1	24.2	402	29.4	8.76	2.82	2.04	21.4	7.36	41.796	58.204	14.647	2.14	12.5	11.1	1.09515	0.0852514
24m-2	24.5	326	27.4	0.35	38.8	27.6	7.02	0.22	33.4755	66.5245	11.0196	1.82	14.8	8.6	0.0809168	0.0733071
24m-3	24.6	420	54.1	10.2	10.4	1.71	13.2	1.52	31.7176	68.2824	17.0124	5.75	28	16.3	0.376378	0.116165
24m-4	23.5	409	53.5	7.82	5.47	9.46	12.5	1.22	26.8266	73.1734	17.1518	5.92	28.7	13.1	0.314774	0.125505
24m-5	23.6	424	45.2	8.15	6.14	3.43	22.2	1.32	30.1418	69.8582	16.9456	4.32	21.2	11.5	0.578236	0.118379
24m-6	23.8	390	52.4	7.32	11.3	7.49	12	0.73	31.5673	68.4327	15.757	4.97	26.6	15	0.281641	0.107829
25m-1	25.2	460	46.7	7.55	7.75	8.7	14.7	1.17	25.3178	74.6822	18.6722	5.93	25.8	11.2	0.370863	0.139448
25m-2	25.3	428	55.6	3.49	8.82	8.2	12.6	2.63	30.9908	69.0092	17.3597	5.56	26.5	15	0.25778	0.119798
25m-3	25.5	404	51.4	12.1	2.77	14.3	10.5	1.44	17.2234	82.7766	18.2105	7.07	31.7	8.49	0.351103	0.150741
25m-4	25.3	402	46.2	9	7.11	8.81	14.6	2.99	24.1053	75.8947	30.1965	9.73	22.5	10.6	0.428042	0.229175
25m-5	25.3	356	4.64	11.5	0.053	62.7	5.45	2.67	38.1156	61.8844	27.907	0.35	0.91	0.83	0.291128	0.172701
25m-6	25.5	402	47.4	5.46	10.2	8.39	17	2.63	25.8098	74.1902	22.1762	7.19	25.3	11.7	0.380209	0.164525
26m-1	26.3	420	43.5	8.07	3.33	19.5	16.5	1.2	52.6442	47.3558	14.4792	2.39	14.1	19.1	0.388512	0.0685672
26m-2	26.3	405	18.3	11.4	3.05	7.99	36.8	2.61	35.8466	64.1534	27.0588	2.24	6.04	4.95	1.73177	0.173592
26m-3	26.5	399	37.4	9.82	13.7	8.01	14	3.95	32	68	21.519	4.66	17	10.8	0.469802	0.146329
26m-4	26.2	378	38.2	10	10	9.71	18.4	2.78	32.6316	67.3684	21.4511	5	18.3	11.9	0.538422	0.144513
26m-5	26.5	424	44	7.75	10.3	14.3	10.3	2.05	26.4984	73.5016	19.8339	5.88	23.7	11.1	0.293003	0.145782
26m-6	26.5	336	8.04	5.97	0.8	77.5	4.46	0.33	31.8859	68.1141	18.6143	0.8	3.48	2.07	0.124624	0.12679
27m-1	27.2	427	43.9	8.88	19.1	2.61	12.1	2.8	26.2349	73.7651	14.1814	4.03	24.3	10.5	0.362445	0.10461
27m-2	27.3	437	48.2	7.01	8.73	4.57	16	3.18	30.7784	69.2216	11.5145	3.1	23.7	12.4	0.425854	0.0797053
27m-3	27.5	434	37.9	13.3	0.47	19.5	25.2	0.69	9.84817	90.1518	66.0501	19.7	10.1	3.54	0.677208	0.595453
27m-5	27	393	53.9	7.62	8.7	3.81	9.91	1.33	24.1989	75.8011	10.9856	3.95	32	11.8	0.283993	0.0832723
27m-6	27	372	37.4	11.9	8.44	4.93	20.4	2.17	31.5789	68.4211	20.2717	4.61	18.2	11	0.678944	0.138701
