# Supplementary material for: Male rat leukocyte population dynamics predict a window for intervention in aging
Source: eLife. 2022 May 4;11:e76808. doi: 10.7554/eLife.76808 (PMC9150891; doi:10.7554/eLife.76808)
Supplement: Source data 3. [file elife-76808-data3.xlsx]

## Sheet: Sheet1
Suppl. Table 3. List of differentially methylated regions (DMRs) that are located <20kb from a transcription start site (TSS)
Young to middle aged										Middle aged to old										Young to old
Hyper methylated					Hypo methylated					Hyper methylated					Hypo methylated					Hyper methylated					Hypo methylated
Chromosome	start	End	Gene symbol	Entrez ID	Chromosome	start	End	Gene symbol	Entrez ID	Chromosome	start	End	Gene symbol	Entrez ID	Chromosome	start	End	Gene symbol	Entrez ID	Chromosome	start	End	Gene symbol	Entrez ID	Chromosome	start	End	Gene symbol	Entrez ID
chr17	76529000	76529200	CAMK1D	307124	chr4	169107000	169107200	PBP2	246145	chr8	71167000	71167200	RBPMS2	503214	chr7	11752600	11752800	OAZ1	25502	chr17	76529000	76529200	CAMK1D	307124	chr4	169107000	169107200	PBP2	246145
chr3	23018200	23018400	NR5A1	83826	chr19	52751200	52751400	ZDHHC7	170906	chr10	71159000	71159200	HNF1B	25640	chr1	200679200	200679400	FGFR2	25022	chr11	32857200	32857400	RUNX1	50662	chr19	52751200	52751400	ZDHHC7	170906
chr3	47689000	47689200	TBR1	680427	chr3	175824000	175824200	SLCO4A1	171144	chr7	125796200	125796400	ARHGAP8	300115	chr5	48303400	48303600	GABRR2	29695	chr10	71159000	71159200	HNF1B	25640	chr3	175824000	175824200	SLCO4A1	171144
chr12	38843800	38844000	HPD	29531	chr15	48465400	48465600	EXTL3	56819	chr1	112946800	112947000	GABRA5	29707	chr5	153973200	153973400	LOC500567	500567	chr1	176982000	176982200	DKK3	171548	chr8	116369600	116369800	SEMA3B	363142
chr1	100360800	100361000	RGD1309036	292874	chr3	3944200	3944400	NOTCH1	25496	chr10	13081400	13081600	KREMEN2	287102	chr7	144979600	144979800	ZFP385A	685474	chr4	83970000	83970200	TRIL	362364	chr6	99411200	99411400	ZBTB1	314246
chr1	264895800	264896000	TLX1	499361	chr8	128734800	128735000	CX3CR1	171056	chr3	123715000	123715200	SPEF1	311429	chr1	82579400	82579600	AXL	308444	chr4	98769400	98769600	FOXI3	502846	chr7	123160000	123160200	POLR3H	300088
chr7	130041600	130041800	PANX2	362979	chrX	155845200	155845400	DKC1	170944	chr15	56958000	56958200	LRCH1	502020	chr5	158083000	158083200	ALDH4A1	641316	chr2	111792600	111792800	NLGN1	116647	chr1	82579400	82579600	AXL	308444
chr3	121660600	121660800	CHCHD5	296147	chr4	120665600	120665800	MGLL	29254	chr4	153816000	153816200	USP18	312688	chr1	59784200	59784400	FPR1	292409	chr1	14777800	14778000	OLIG3	293012	chr13	82487200	82487400	F5	304929
chr15	41691600	41691800	EBPL	361054	chr6	99411200	99411400	ZBTB1	314246	chr20	5742800	5743000	UQCC2	361805	chr6	137371400	137371600	CLBA1	362793	chr10	97229800	97230000	AXIN2	29134	chr19	55387600	55387800	APRT	292072
chr6	94834200	94834400	L3HYPDH	314214	chr7	123160000	123160200	POLR3H	300088	chr5	147776200	147776400	LCK	313050	chr15	4568400	4568600	KCNK5	364241	chr12	14092800	14093000	RADIL	304299	chr1	59784200	59784400	FPR1	292409
chr13	52978200	52978400	KIF21B	289397	chr1	82579400	82579600	AXL	308444	chr1	80203800	80204000	RTN2	308410	chr10	110379600	110379800	UTS2R	57305	chr15	43902400	43902600	EBF2	361060	chr13	71176400	71176600	RGS16	360857
chr16	19223000	19223200	KLF2	306330	chr13	82487200	82487400	F5	304929	chr1	85492400	85492600	SELENOV	499113	chr5	173391000	173391200	C1QTNF12	313774	chr9	12734400	12734600	RFTN1	501095	chr6	137371400	137371600	CLBA1	362793
chr3	141405800	141406000	NKX2-2	366214	chr19	55387600	55387800	APRT	292072	chr11	64935800	64936000	POPDC2	360718	chr20	14601400	14601600	GNAZ	25740	chr1	85492400	85492600	SELENOV	499113	chr19	55368000	55368200	PIEZO1	361430
chr8	33820200	33820400	ETS1	24356	chr1	59784200	59784400	FPR1	292409	chr9	97063800	97064000	GBX2	114500	chr12	18527600	18527800	ASMT	246281	chr12	13363400	13363600	ZFP316	304293	chr4	126291600	126291800	MAGI1	500261
chr15	28404600	28404800	ZFP219	305848	chr15	4568400	4568600	KCNK5	364241	chr12	13363400	13363600	ZFP316	304293	chr16	10417200	10417400	ANXA8	306283	chr6	94834200	94834400	L3HYPDH	314214	chr5	173391000	173391200	C1QTNF12	313774
chr20	13971200	13971400	SUSD2	294335	chr7	131334400	131334600	ALG10	245960	chr6	94834200	94834400	L3HYPDH	314214	chr7	34325400	34325600	HAL	29301	chr13	52978200	52978400	KIF21B	289397	chr13	51565400	51565600	SYT2	24805
chr8	23061800	23062000	ELAVL3	282824	chr7	3320200	3320400	GDF11	29454	chr13	52978200	52978400	KIF21B	289397	chr5	151792600	151792800	GPN2	362614	chr10	97216600	97216800	AXIN2	29134	chr10	40498000	40498200	SLC36A3	303148
chr10	61697800	61698000	MNT	287521	chr8	13242600	13242800	PIWIL4	689972	chr16	19223000	19223200	KLF2	306330	chr5	59044600	59044800	CREB3	298400	chr15	51758800	51759000	EGR3	25148	chr4	153932200	153932400	SLC6A12	50676
chr1	198214000	198214200	TBX6	365371	chr12	18527600	18527800	ASMT	246281	chr5	3431200	3431400	KCNB2	117105	chr8	22758000	22758200	LDLR	300438	chr3	141405800	141406000	NKX2-2	366214	chr7	3320200	3320400	GDF11	29454
chr1	170410400	170410600	APBB1	29722	chr10	4951600	4951800	PRM3	442921	chr14	106859200	106859400	OTX1	25646	chr10	45528400	45528600	GJC2	497913	chr13	79816200	79816400	SUCO	360863	chr20	7204600	7204800	NUDT3	294292
chr10	56412000	56412200	FGF11	170632	chr10	18955200	18955400	KCNIP1	65023	chr13	79816200	79816400	SUCO	360863	chr1	56679400	56679600	THBS2	292406	chr8	23061800	23062000	ELAVL3	282824	chr16	10417200	10417400	ANXA8	306283
chr3	15772000	15772200	OLR397	296663	chr11	64952600	64952800	POPDC2	360718	chr7	57662200	57662400	TRHDE	366894	chr7	28928400	28928600	DRAM1	679937	chr10	61697800	61698000	MNT	287521	chr11	64952600	64952800	POPDC2	360718
chr19	58519800	58520000	MAP10	307948	chr5	151792600	151792800	GPN2	362614	chr1	270472800	270473000	SORCS1	309533	chr8	127709600	127709800	MIR26A	100314290	chr1	33277000	33277200	IRX2	306657	chr1	89551600	89551800	HPN	29135
chr5	147776200	147776400	LCK	313050	chr15	34452200	34452400	LTB4R	59264	chr3	152912600	152912800	TGIF2	499929	chr10	105669000	105669200	ST6GALNAC2	303692	chr1	270472800	270473000	SORCS1	309533	chr15	33357200	33357400	CEBPE	25410
chr17	13823000	13823200	S1PR3	306792	chr5	61385200	61385400	ALDH1B1	298079	chr10	56412000	56412200	FGF11	170632	chr3	11625600	11625800	ST6GALNAC6	407765	chr5	3431200	3431400	KCNB2	117105	chr9	10953400	10953600	LRG1	367455
chr5	159436000	159436200	PADI2	29511	chr16	36094000	36094200	HMGB2	29395	chr18	30896600	30896800	PCDHGA10	498849	chr19	58825400	58825600	KCNK1	59324	chr1	170410400	170410600	APBB1	29722	chr5	59044600	59044800	CREB3	298400
chr1	143277600	143277800	CPEB1	293056	chr20	31987200	31987400	HK1	25058	chr1	33910600	33910800	IRX1	306659	chr5	57410800	57411000	AQP3	65133	chr10	56412000	56412200	FGF11	170632	chr5	153842800	153843000	MIR6333	102465167
chr1	216683000	216683200	SLC22A18	309131	chr8	22758000	22758200	LDLR	300438	chr5	88630400	88630600	TLE1	362533	chr14	35140800	35141000	KIT	64030	chr12	9605600	9605800	GSX1	288457	chr8	22758000	22758200	LDLR	300438
chr6	75074400	75074600	EGLN3	54702	chr12	41517200	41517400	TPCN1	246215	chr9	15495000	15495200	TAF8	316216	chr10	106815400	106815600	SYNGR2	89815	chr10	63499200	63499400	TRARG1	360576	chr12	41517200	41517400	TPCN1	246215
chrX	156226200	156226400	OLR1768	293878	chr3	15574400	15574600	PTGS1	24693	chr4	122224800	122225000	LOC685964	685964	chr3	13961000	13961200	PHF19	296653	chr7	11302800	11303000	TJP3	314640	chr1	102843800	102844000	HPS5	308598
chr6	53404600	53404800	TWIST1	85489	chr12	14260600	14260800	FOXK1	304298	chr10	27366200	27366400	GABRA1	29705	chr1	252456200	252456400	ANKRD22	294093	chr5	147776200	147776400	LCK	313050	chr12	14260600	14260800	FOXK1	304298
chr12	21832200	21832400	CLDN3	65130	chr10	109089800	109090000	CHMP6	287873	chr17	13823000	13823200	S1PR3	306792	chr19	10400400	10400600	DRC7	291853	chr10	27366200	27366400	GABRA1	29705	chr3	170255800	170256000	MC3R	29310
chr3	160854200	160854400	MATN4	296358	chr10	88620800	88621000	HSPB9	363681	chr4	58250000	58250200	KLF14	312203	chr20	22468400	22468600	EGR2	114090	chr17	13823000	13823200	S1PR3	306792	chr4	181087200	181087400	ARNTL2	362464
chr7	141053000	141053200	TMBIM6	24822	chr8	57971600	57971800	POGLUT3	315664	chr13	50898200	50898400	BTG2	29619	chr7	12281000	12281200	RPS15	29285	chr13	50898200	50898400	BTG2	29619	chr10	88620800	88621000	HSPB9	363681
chr10	87081200	87081400	CCR7	287673	chr10	59567600	59567800	P2RX1	25505	chr20	37587800	37588000	MSL3L2	309790	chr12	39014600	39014800	KDM2B	304495	chr5	159436000	159436200	PADI2	29511	chr7	130145000	130145200	MIR349	100313983
chr1	277352200	277352400	DCLRE1A	292127	chr6	137668400	137668600	GPR132	314480	chr5	159436000	159436200	PADI2	29511	chr10	40497800	40498000	SLC36A3	303148	chr10	73337800	73338000	TBX4	303399	chr10	59567600	59567800	P2RX1	25505
chr7	144629800	144630000	MIR615	100314129	chr12	25166800	25167000	ERVFRD-1	288602	chr18	69729800	69730000	ELAC1	307604	chr13	47887600	47887800	MAPKAPK2	289014	chr1	216683000	216683200	SLC22A18	309131	chr5	74942400	74942600	AKAP2	298024
chr3	15429800	15430000	LHX6	311901	chr20	5087400	5087600	ABHD16A	361796	chr2	229718800	229719000	UGT8	50555	chr19	52668400	52668600	CRISPLD2	171547	chr1	53840600	53840800	AFDN	26955	chr12	25166800	25167000	ERVFRD-1	288602
chr1	216648000	216648200	CDKN1C	246060	chr16	69025400	69025600	GOT1L1	306540	chr1	81500200	81500400	LYPD3	60378	chr8	63521200	63521400	REC114	300751	chr18	14016400	14016600	NOL4	307553	chr3	11625600	11625800	ST6GALNAC6	407765
chr4	157406400	157406600	CD4	24932	chr5	57410800	57411000	AQP3	65133	chr2	247046400	247046600	UNC5C	362049	chr13	90977400	90977600	SLAMF8	289237	chr7	117146600	117146800	NRBP2	680451	chr7	72933000	72933200	LAPTM4B	315047
chr7	121798000	121798200	GRAP2	366962	chr2	200205600	200205800	NOTCH2	29492	chr6	104072000	104072200	GALNT16	362760	chr9	84418200	84418400	MOGAT1	363261	chr1	198396400	198396600	CDIPT	192260	chr3	11114600	11114800	PLPP7	296635
chr8	14373400	14373600	MTNR1B	192646	chr20	27164400	27164600	HNRNPH3	361838	chr5	155398000	155398200	ZBTB40	362635	chr6	129600200	129600400	PAPOLA	314417	chr8	127186600	127186800	GOLGA4	501069	chr10	82296200	82296400	CHAD	29195
chr18	79336800	79337000	MBP	24547	chr3	11114600	11114800	PLPP7	296635	chr12	21832200	21832400	CLDN3	65130	chr1	213818800	213819000	IFITM3	361673	chr1	81500200	81500400	LYPD3	60378	chr1	273752400	273752600	XPNPEP1	170751
chr11	32858400	32858600	RUNX1	50662	chr10	82296200	82296400	CHAD	29195	chr10	85062800	85063000	TBX21	303496	chr9	81451400	81451600	CXCR1	54258	chr2	247046400	247046600	UNC5C	362049	chr19	55913200	55913400	RPL13	81765
chr20	7672200	7672400	TCP11	309641	chr1	252456200	252456400	ANKRD22	294093	chr3	124144200	124144400	ADRA1D	29413	chr10	82100800	82101000	ABCC3	140668	chr7	116357000	116357200	LY6E	362934	chr7	117262200	117262400	PLEC	64204
chr6	69972600	69972800	FOXG1	24370	chr12	21840000	21840200	CLDN3	65130	chr18	59749600	59749800	ST8SIA3	25547	chr2	189880000	189880200	SNAPIN	295217	chr12	21832200	21832400	CLDN3	65130	chr9	98182600	98182800	LRRFIP1	367314
chr14	91797800	91798000	IKZF1	305501	chr9	98182600	98182800	LRRFIP1	367314	chr3	1924400	1924600	CACNA1B	257648	chr19	55387600	55387800	APRT	292072	chr7	70839000	70839200	NXPH4	59316	chr1	266916200	266916400	CALHM2	294019
chr8	120433200	120433400	ARPP21	363153	chr1	141672000	141672200	ARPIN	308765	chr12	22189200	22189400	TFR2	288562	chr5	135994800	135995000	PLK3	58936	chr13	76055600	76055800	ASTN1	304900	chr20	5064600	5064800	LY6G6D	415062
chr8	63090800	63091000	LOXL1	315714	chr4	168131400	168131600	BCL2L14	500348	chr9	17224800	17225000	RSPH9	316238	chr13	88349200	88349400	DDR2	685781	chr7	141053000	141053200	TMBIM6	24822	chr12	39014600	39014800	KDM2B	304495
chr13	83919200	83919400	RCSD1	360872	chr12	39014600	39014800	KDM2B	304495	chr17	44595000	44595200	POM121L2	502128	chr2	200205400	200205600	NOTCH2	29492	chr10	87081200	87081400	CCR7	287673	chr20	6567000	6567200	MLN	100126231
chr1	23238800	23239000	EYA4	292172	chr6	137375200	137375400	CLBA1	362793	chr7	144629800	144630000	MIR615	100314129	chr5	141008000	141008200	OXCT2A	100361036	chr1	165181400	165181600	KCNE3	63883	chr4	120665600	120665800	MGLL	29254
chr3	61597600	61597800	HOXD12	366082	chr13	89830600	89830800	F11R	116479	chr17	44550400	44550600	PRSS16	364719	chr10	85761000	85761200	LASP1	29278	chr1	277352200	277352400	DCLRE1A	292127	chr10	95237000	95237200	RGD1565033	498014
chr14	45349600	45349800	MIR328B	100526626	chr1	163458600	163458800	LRRC32	293135	chr16	20032200	20032400	NIBAN3	498604	chr10	10640000	10640200	PPL	302934	chr16	57136600	57136800	SGCZ	364605	chr4	145610800	145611000	IRAK2	362418
chr10	64543000	64543200	NXN	360577	chr16	69248400	69248600	ZFP703	680717	chr1	216648000	216648200	CDKN1C	246060	chr12	47578800	47579000	ANKRD13A	360823	chr5	43603600	43603800	EPHA7	171287	chr1	211272000	211272200	BNIP3	84480
chr4	115440600	115440800	TEX261	297392	chr10	64969400	64969600	PIPOX	303272	chr3	61578400	61578600	HOXD13	288154	chr10	89257400	89257600	AOC3	29473	chr7	141374800	141375000	GPD1	60666	chr9	14722200	14722400	TREM3	367215
chr13	47614400	47614600	IL24	170819	chr6	129600200	129600400	PAPOLA	314417	chr5	57899400	57899600	MYORG	366360	chr19	10329400	10329600	KIFC3	307644	chr3	159823800	159824000	GDAP1L1	311616	chr7	144979600	144979800	ZFP385A	685474
chr7	128500000	128500200	TAFA5	500915	chr19	52485600	52485800	COTL1	361422	chr1	277815000	277815200	AFAP1L2	292130	chr6	132752800	132753000	MIR345	100314147	chr18	30826200	30826400	PCDHGA3	498847	chr13	90977400	90977600	SLAMF8	289237
chr10	56576000	56576200	CLDN7	65132	chr15	33356800	33357000	CEBPE	25410	chr6	132239800	132240000	CYP46A1	362782	chr10	93519200	93519400	MRC2	498011	chr17	44550400	44550600	PRSS16	364719	chr10	4951600	4951800	PRM3	442921
chr18	30896400	30896600	PCDHGA10	498849	chr9	81451400	81451600	CXCR1	54258	chr13	51137200	51137400	MYOG	29148	chr7	129610800	129611000	ZDHHC25	300323	chr10	106856400	106856600	BIRC5	64041	chr17	16403400	16403600	MIRLET7A1	100314213
chr16	79708000	79708200	KBTBD11	306617	chr2	189880000	189880200	SNAPIN	295217	chr14	35582800	35583000	PDGFRA	25267	chr9	10770800	10771000	ARRDC5	680452	chr7	140316200	140316400	CACNB3	25297	chr1	213818800	213819000	IFITM3	361673
chr10	107265200	107265400	CYTH1	116691	chr10	56429800	56430000	SPEM1	691981	chr11	32858400	32858600	RUNX1	50662	chr14	21602800	21603000	VCSA2	289526	chr7	57663000	57663200	TRHDE	366894	chr17	42054800	42055000	MRS2	79032
chr16	21294800	21295000	CILP2	306356	chr7	13042000	13042200	MIER2	362841	chr20	7672200	7672400	TCP11	309641	chr10	12938000	12938200	ZSCAN10	302962	chr18	29961200	29961400	PCDHA2	393086	chr7	117265400	117265600	PLEC	64204
chr16	67047800	67048000	UNC5D	306534	chr6	10532000	10532200	RHOQ	85428	chr6	69972600	69972800	FOXG1	24370	chr6	51270800	51271000	HBP1	27080	chr7	121798000	121798200	GRAP2	366962	chr15	33356800	33357000	CEBPE	25410
chr5	133712400	133712600	FOXE3	171302	chr5	135994800	135995000	PLK3	58936	chr19	25899400	25899600	NF1X	81524	chr10	28972600	28972800	MIR146A	100314241	chr1	277815000	277815200	AFAP1L2	292130	chr2	189880000	189880200	SNAPIN	295217
chr20	4394000	4394200	PRRT1	406167	chr9	16667800	16668000	PTK7	301242	chr6	119520000	119520200	FLRT2	299236	chr5	155208600	155208800	EPHB2	313633	chr2	210365000	210365200	ALX3	365900	chr5	138156000	138156200	SLC2A1	24778
chr12	41663200	41663400	LHX5	124451	chr19	58825200	58825400	KCNK1	59324	chr17	21381800	21382000	ELOVL2	498728	chr10	5295200	5295400	TVP23A	360467	chr4	49941000	49941200	PTPRZ1	25613	chr19	58825200	58825400	KCNK1	59324
chr10	18443800	18444000	RANBP17	303029	chr2	200205400	200205600	NOTCH2	29492	chr20	9596200	9596400	GLP1R	25051	chr3	164664400	164664600	PTPN1	24697	chr11	32858400	32858600	RUNX1	50662	chr15	27933600	27933800	RNASE10	305840
chr5	133712600	133712800	FOXE3	171302	chr20	4610600	4610800	NEU1	24591	chr11	86519000	86519200	GP1BB	116727	chr2	187228200	187228400	SH2D2A	310688	chr5	143500000	143500200	GRIK3	298521	chr10	11215800	11216000	TFAP4	360482
chr1	166601600	166601800	MIR139	100314240	chr19	43616600	43616800	FA2H	307855	chr3	5957800	5958000	VAV2	296603	chr9	67702800	67703000	CTLA4	63835	chr20	7672200	7672400	TCP11	309641	chr10	84153400	84153600	HOXB5	497987
chr19	10099800	10100000	MMP15	291848	chr8	55270400	55270600	PPP2R1B	315648	chr12	13363600	13363800	ZFP316	304293	chr9	18652000	18652200	RUNX2	367218	chr17	88216200	88216400	GPR158	291352	chr19	10329400	10329600	KIFC3	307644
chr3	145032000	145032200	SYNDIG1	362235	chr10	84153400	84153600	HOXB5	497987	chr8	63090800	63091000	LOXL1	315714	chr10	61994000	61994200	HIC1	303310	chr3	61580800	61581000	HOXD13	288154	chr9	84420400	84420600	MOGAT1	363261
chr15	47292600	47292800	SOX7	290317	chr10	103735600	103735800	NAT9	303669	chr1	56168200	56168400	DACT2	308212	chr7	116926000	116926200	NAPRT	315085	chr8	120433200	120433400	ARPP21	363153	chr20	7957200	7957400	TULP1	309900
chr17	78771800	78772000	SUV39H2	364785	chr2	196293600	196293800	TMOD4	295261	chr10	91046000	91046200	C1QL1	363686	chr19	52662200	52662400	CRISPLD2	171547	chr11	34314000	34314200	SIM2	304071	chr10	103480200	103480400	CD300LB	501738
chr6	69972000	69972200	FOXG1	24370	chr1	263796000	263796200	CYP2C23	83790	chr6	77509800	77510000	NKX2-8	299061	chr6	133736800	133737000	MIR370	100314254	chr10	96020000	96020200	CACNG4	140725	chr10	93519200	93519400	MRC2	498011
chr19	10310000	10310200	KIFC3	307644	chr10	103480200	103480400	CD300LB	501738	chr5	153773800	153774000	RCAN3	362627	chr16	81851000	81851200	F7	260320	chr8	63090800	63091000	LOXL1	315714	chr4	68831600	68831800	TAS2R138	500091
chr12	13362400	13362600	ZFP316	304293	chr18	76749200	76749400	HSBP1L1	100192205	chr16	8821800	8822000	DRGX	252880	chr3	9035200	9035400	IER5L	499772	chr3	56768400	56768600	SP5	296510	chr1	86988800	86989000	HNRNPL	80846
chr13	52978000	52978200	KIF21B	289397	chr6	9769600	9769800	RGD1562146	500612	chr12	42489600	42489800	TBX3	353305	chr20	4542400	4542600	CFB	294257	chr1	170398600	170398800	APBB1	29722	chr13	101364400	101364600	TLR5	289337
chr13	90949600	90949800	VSIG8	289236	chr5	167117400	167117600	GPR157	313725	chr7	144578400	144578600	HOXC10	315338	chr10	103739000	103739200	TMEM104	303670	chr1	23238800	23239000	EYA4	292172	chr9	10770800	10771000	ARRDC5	680452
chr20	37587800	37588000	MSL3L2	309790	chr3	6227400	6227600	RXRA	25271	chr10	35749800	35750000	LTC4S	114097	chr8	82366600	82366800	LEO1	300837	chr5	57899200	57899400	MYORG	366360	chr7	70460200	70460400	SLC26A10	366909
chr19	25899200	25899400	NF1X	81524	chr9	10770800	10771000	ARRDC5	680452	chr1	33911000	33911200	IRX1	306659	chr15	108471000	108471200	TIMM8A2	680794	chr16	8821800	8822000	DRGX	252880	chr10	5295200	5295400	TVP23A	360467
chr20	7882000	7882200	FANCE	309643	chr2	207441600	207441800	WNT2B	116466	chrX	1800800	1801000	NDUFB11	299310	chr10	14934000	14934200	SOX8	302993	chr3	61597600	61597800	HOXD12	366082	chr10	101297000	101297200	SOX9	140586
chr10	39655600	39655800	ACSL6	117243	chr19	48183600	48183800	MAF	54267	chr10	56576000	56576200	CLDN7	65132	chr7	143347600	143347800	KRT71	683613	chr3	171055800	171056000	RBM38	366262	chr9	67702800	67703000	CTLA4	63835
chr8	95388800	95389000	TBX18	315870	chr6	51270800	51271000	HBP1	27080	chr3	170039600	170039800	CBLN4	499947	chr1	89269600	89269800	FFAR2	292794	chr14	45349600	45349800	MIR328B	100526626	chr9	100165200	100165400	AQP12A	367316
chr1	53051800	53052000	MPC1	171087	chr13	110090800	110091000	PPP2R5A	312754	chr5	62164800	62165000	TRIM14	313236	chr10	66243400	66243600	LGALS5	25475	chr6	78540000	78540200	FOXA1	25098	chr10	55049000	55049200	PIK3R5	497931
chr19	44124600	44124800	CHST5	307859	chr17	16403400	16403600	MIRLET7A1	100314213	chr7	14190000	14190200	NOTCH3	56761	chr6	136324400	136324600	KLC1	171041	chr17	44549400	44549600	PRSS16	364719	chr1	217348600	217348800	SHANK2	171093
chr6	89292800	89293000	MDGA2	314180	chr3	11114800	11115000	PLPP7	296635	chr1	33273200	33273400	IRX2	306657	chr16	7668400	7668600	COLQ	29755	chr10	35749800	35750000	LTC4S	114097	chr8	54927800	54928000	PLET1	363060
chrX	156226400	156226600	OLR1768	293878	chr13	50175800	50176000	LAX1	498232	chr3	22641400	22641600	LHX2	296706	chr7	70460200	70460400	SLC26A10	366909	chr7	57662000	57662200	TRHDE	366894	chr9	116242400	116242600	ARHGAP28	301709
chr2	40655200	40655400	PDE4D	24627	chr10	5295200	5295400	TVP23A	360467	chr16	21294800	21295000	CILP2	306356	chr1	214208400	214208600	MIR3574	100526589	chr12	31759600	31759800	FZD10	363913	chr7	141072200	141072400	TMBIM6	24822
chr5	147776400	147776600	LCK	313050	chr1	164648800	164649000	SLCO2B1	140860	chr15	90194200	90194400	SPRY2	306141	chr15	33357200	33357400	CEBPE	25410	chr2	179704800	179705000	GRIA2	29627	chr2	187863000	187863200	LMNA	60374
chr3	141406000	141406200	NKX2-2	366214	chr5	143109000	143109200	ZC3H12A	313587	chr12	14092600	14092800	RADIL	304299	chr5	59152000	59152200	HINT2	313491	chr4	115440600	115440800	TEX261	297392	chr1	219136600	219136800	TCIRG1	293650
chr9	12734400	12734600	RFTN1	501095	chr4	120125600	120125800	GATA2	25159	chr1	221108800	221109000	LTBP3	83838	chr3	122195600	122195800	PDYN	29190	chr7	128500000	128500200	TAFA5	500915	chr9	113590800	113591000	RALBP1	84014
chr18	61639200	61639400	RAX	114213	chr5	161878200	161878400	PRDM2	313678	chr16	77152800	77153000	CSMD1	364634	chr5	117879000	117879200	ATG4C	313391	chr13	91071000	91071200	CRP	25419	chr7	34325400	34325600	HAL	29301
chr3	2802400	2802600	PHPT1	296571	chr3	160948600	160948800	PIGT	296360	chr3	160853200	160853400	MATN4	296358	chr2	196293600	196293800	TMOD4	295261	chr3	170039600	170039800	CBLN4	499947	chr9	40975000	40975200	PTPN18	301333
chr19	19403800	19404000	SNX20	307742	chr9	18652000	18652200	RUNX2	367218	chr5	58978400	58978600	SIT1	500449	chr3	94034800	94035000	RGD1563222	362175	chr3	95133600	95133800	WT1	24883	chr19	11295200	11295400	MT1	24567
chr3	43116000	43116200	NR4A2	54278	chr20	31333600	31333800	AIFM2	361843	chr10	23663600	23663800	EBF1	116543	chr13	102706800	102707000	2021-03-01	#N/A	chr5	61382600	61382800	ALDH1B1	298079	chr16	81851000	81851200	F7	260320
chr5	58163400	58163600	CCL27	362505	chr10	61994000	61994200	HIC1	303310	chr10	18443800	18444000	RANBP17	303029	chr10	91292400	91292600	SPATA32	287747	chr3	61598000	61598200	HOXD12	366082	chr10	103739000	103739200	TMEM104	303670
chr1	261670200	261670400	CRTAC1	171438	chr14	23496800	23497000	UBA6	305268	chr10	55928200	55928400	KCNAB3	58981	chr1	214328200	214328400	EPS8L2	361674	chr18	30896400	30896600	PCDHGA10	498849	chr1	82497000	82497200	CCDC97	292724
chr1	164426200	164426400	RPS3	140654	chr7	41301800	41302000	GALNT4	500826	chr1	166601600	166601800	MIR139	100314240	chr1	89043400	89043600	MIR3569	100526585	chr10	31144800	31145000	ADAM19	303068	chr17	11698000	11698200	MSX2	25483
chr2	189855200	189855400	NPR1	24603	chr3	164041600	164041800	B4GALT5	362275	chr10	106975600	106975800	SOCS3	89829	chr19	57063600	57063800	GALNT2	292090	chr8	29452800	29453000	OPCML	116597	chr20	5875600	5875800	SRPK1	361811
chr4	83970000	83970200	TRIL	362364	chr3	29990400	29990600	ZEB2OS	103691779	chr8	119566400	119566600	TRANK1	316022	chr5	172642000	172642200	FAAP20	362678	chr5	107825000	107825200	CDKN2A	25163	chr13	110091800	110092000	PPP2R5A	312754
chr7	61797000	61797200	DYRK2	314862	chr12	6876800	6877000	ALOX5AP	29624	chr12	13362400	13362600	ZFP316	304293	chr10	109193000	109193200	MIR3065	100526580	chr11	87058200	87058400	PRODH1	680409	chr16	6958400	6958600	MUSTN1	290553
chr14	83754600	83754800	SELENOM	498398	chr13	110091800	110092000	PPP2R5A	312754	chr16	20032000	20032200	NIBAN3	498604	chr8	36309800	36310000	ST3GAL4	363040	chr2	186905400	186905600	ETV3L	499651	chr7	143347600	143347800	KRT71	683613
chr1	78053600	78053800	MEIS3	361514	chr18	28668800	28669000	CXXC5	291670	chr13	52978000	52978200	KIF21B	289397	chr9	65968400	65968600	MPP4	58808	chr8	108109200	108109400	SOX14	300954	chr12	41591000	41591200	SLC8B1	498185
chr10	86687000	86687200	NR1D1	252917	chr16	6958400	6958600	MUSTN1	290553	chr5	144761800	144762000	TFAP2E	313596	chr7	70617200	70617400	ARHGAP9	362893	chr6	128719600	128719800	SYNE3	299356	chr3	164238000	164238200	SPATA2	114210
chr17	88216000	88216200	GPR158	291352	chr13	109978800	109979000	NENF	289380	chr8	95388800	95389000	TBX18	315870	chr4	148805000	148805200	RASSF4	362423	chr3	156339600	156339800	MAFB	54264	chr14	7167400	7167600	KLHL8	289457
chr14	84246000	84246200	GAL3ST1	683713	chr19	14351800	14352000	HMGXB4	307667	chr14	106859000	106859200	OTX1	25646	chr16	10279600	10279800	RBP3	24711	chr3	15429800	15430000	LHX6	311901	chr15	17671800	17672000	LOC361016	361016
chr10	82419400	82419600	XYLT2	64134	chr3	164238000	164238200	SPATA2	114210	chr6	134626800	134627000	DIO3	29475	chr1	12827000	12827200	CITED2	114490	chr10	84028200	84028400	HOXB13	303480	chr6	136324400	136324600	KLC1	171041
chr4	169096200	169096400	PBP2	246145	chr1	89269600	89269800	FFAR2	292794	chr10	88497800	88498000	CNP	25275	chr15	4488600	4488800	KCNK16	688996	chr12	41663200	41663400	LHX5	124451	chr14	36688600	36688800	USP46	289584
chr8	108108600	108108800	SOX14	300954	chr14	36688600	36688800	USP46	289584	chr17	72426600	72426800	GATA3	85471	chr19	43616600	43616800	FA2H	307855	chr10	23663600	23663800	EBF1	116543	chr16	7668400	7668600	COLQ	29755
chr10	85555800	85556000	EPOP	691153	chr15	33357200	33357400	CEBPE	25410	chr13	47614400	47614600	IL24	170819	chr19	9792000	9792200	NDRG4	64457	chr6	95922600	95922800	SIX1	114634	chr12	40500000	40500200	MAPKAPK5	498183
chr6	132950400	132950600	BEGAIN	79146	chr20	7204600	7204800	NUDT3	294292	chr12	23548600	23548800	ORAI2	304592	chr14	46142600	46142800	LOC498368	498368	chr10	18443800	18444000	RANBP17	303029	chr3	44734000	44734200	GAPDH-PS1	366057
chr7	31876800	31877000	TMPO	25359	chr10	45521000	45521200	IBA57	363611	chr20	7882000	7882200	FANCE	309643	chr1	80496000	80496200	GEMIN7	499391	chr10	55928200	55928400	KCNAB3	58981	chr20	27000000	27000200	MYPN	309760
chr3	159322400	159322600	SRSF6	362264	chr9	17798600	17798800	SLC29A1	63997	chr16	21058800	21059000	NCAN	58982	chr15	18457000	18457200	ACOX2	252898	chr5	133712600	133712800	FOXE3	171302	chr4	15519400	15519600	HGF	24446
chr1	216661800	216662000	CDKN1C	246060	chr4	15519400	15519600	HGF	24446	chr14	107607600	107607800	B3GNT2	305571	chr12	9858600	9858800	GTF3A	246299	chr1	166601600	166601800	MIR139	100314240	chr5	76183200	76183400	GNG10	114119
chr1	65532000	65532200	UBE2M	361509	chr5	76183200	76183400	GNG10	114119	chr1	53051800	53052000	MPC1	171087	chr12	22710000	22710200	MIR702	100526603	chr19	10099800	10100000	MMP15	291848	chr5	117879000	117879200	ATG4C	313391
chr1	78592400	78592600	ARHGAP35	306400	chr8	22204000	22204200	PDE4A	25638	chr2	185851400	185851600	MAB21L2	680102	chr16	54319000	54319200	MTUS1	306487	chr8	48085000	48085200	NECTIN1	192183	chr3	58444400	58444600	ITGA6	114517
chr16	21295200	21295400	CILP2	306356	chr5	117879000	117879200	ATG4C	313391	chr10	56576600	56576800	CLDN7	65132	chr18	60719600	60719800	LOC502176		chr1	212526400	212526600	MSX3	114504	chr10	91292400	91292600	SPATA32	287747
chr3	145032200	145032400	SYNDIG1	362235	chr7	139273800	139274000	SLC48A1	300191	chr10	108145400	108145600	CBX8	303731	chr11	24275200	24275400	ATP5PF	94271	chr15	47292600	47292800	SOX7	290317	chr1	214328200	214328400	EPS8L2	361674
chr2	145173200	145173400	MAB21L1	688394	chr1	89365800	89366000	HAMP	84604	chr18	56180200	56180400	ARSI	307404	chr17	9992600	9992800	FGFR4	25114	chr17	78771800	78772000	SUV39H2	364785	chr20	31333600	31333800	AIFM2	361843
chr14	78312400	78312600	CRMP1	25415	chr7	12581800	12582000	WDR18	314617	chr6	3807800	3808000	THUMPD2	313851	chr17	9166800	9167000	NEUROG1	29410	chr7	134723800	134724000	PRICKLE1	315259	chr5	172642000	172642200	FAAP20	362678
chr1	209636400	209636600	EBF3	361668	chr8	54927800	54928000	PLET1	363060	chr5	153756200	153756400	NCMAP	689826	chr7	122998000	122998200	ZC3H7B	315158	chr12	13362400	13362600	ZFP316	304293	chr1	101397200	101397400	KCNA7	365241
chr18	30820400	30820600	PCDHGA3	498847	chr8	36299600	36299800	ST3GAL4	363040	chr12	47674200	47674400	GLTP	288707	chr1	82496800	82497000	CCDC97	292724	chr3	129357000	129357200	PAK7	311450	chr1	81118200	81118400	ZFP61	499094
chr8	71166800	71167000	RBPMS2	503214	chr7	34325400	34325600	HAL	29301	chr8	93491200	93491400	TPBG	83684	chr9	98205000	98205200	LRRFIP1	367314	chr13	52978000	52978200	KIF21B	289397	chr7	137157000	137157200	ANO6	315272
chr7	11302800	11303000	TJP3	314640	chr19	37290400	37290600	TMEM208	291963	chr5	60184600	60184800	PAX5	500453	chr20	4563800	4564000	C2	24231	chr16	79698800	79699000	KBTBD11	306617	chr7	70617200	70617400	ARHGAP9	362893
chr20	10273600	10273800	NDUFV3	64539	chr3	9805000	9805200	TOR1A	266606	chr6	75074400	75074600	EGLN3	54702	chr5	57411000	57411200	AQP3	65133	chr10	73280000	73280200	TBX2	303398	chr4	85196000	85196200	GGCT	362368
chr12	13363000	13363200	ZFP316	304293	chr1	221300800	221301000	CDC42EP2	309175	chr10	87081200	87081400	CCR7	287673	chr2	250824000	250824200	CLCA4L	499721	chr20	37587800	37588000	MSL3L2	309790	chr15	4488600	4488800	KCNK16	688996
chr20	8395600	8395800	CCDC167	689755	chr12	40500000	40500200	MAPKAPK5	498183	chr1	221758800	221759000	PYGM	24701	chr9	113590800	113591000	RALBP1	84014	chr19	25899200	25899400	NF1X	81524	chr19	43616600	43616800	FA2H	307855
chr10	91175000	91175200	PLCD3	287745	chr20	18498600	18498800	CISD1	294362	chr3	141406000	141406200	NKX2-2	366214	chr1	267323800	267324000	STN1	294025	chr17	31440200	31440400	TUBB2B	291081	chr5	152700000	152700200	PAQR7	313615
chr6	104072000	104072200	GALNT16	362760	chr4	85196000	85196200	GGCT	362368	chr12	47665200	47665400	GLTP	288707	chr7	11676600	11676800	TIMM13	252928	chr12	41676000	41676200	LHX5	124451	chr12	16116800	16117000	LFNG	170905
chr6	146786800	146787000	SP8	299499	chr1	12827000	12827200	CITED2	114490	chr9	15294600	15294800	FRS3	316213	chr17	21368200	21368400	ELOVL2	498728	chr13	89528800	89529000	MPZ	24564	chr14	46142600	46142800	LOC498368	498368
chr5	57899200	57899400	MYORG	366360	chr15	4488600	4488800	KCNK16	688996	chr15	52244800	52245000	HR	60563	chr6	132950600	132950800	BEGAIN	79146	chr7	31876600	31876800	TMPO	25359	chr15	28396800	28397000	ZFP219	305848
chr1	196866000	196866200	NSMCE1	361645	chr12	16116800	16117000	LFNG	170905	chr18	61639200	61639400	RAX	114213	chrX	159170200	159170400	FHL1	25177	chr1	218003000	218003200	FGF3	170633	chr17	15761600	15761800	FGD3	361223
chr4	142453000	142453200	GRM7	81672	chr20	5529200	5529400	PHF1	294287	chr3	2802400	2802600	PHPT1	296571	chr10	103739200	103739400	TMEM104	303670	chr1	11907200	11907400	RN5-8S	100861534	chr8	128528000	128528200	SCN11A	29701
chr2	186875000	186875200	ETV3	295297	chr10	93519200	93519400	MRC2	498011	chr1	80253200	80253400	ERCC1	292673	chr12	45714000	45714200	SRRM4	498189	chr7	12235200	12235400	ADAMTSL5	314626	chr1	94610200	94610400	PLEKHF1	308543
chr20	4389600	4389800	PPT2	54398	chr6	9769800	9770000	RGD1562146	500612	chr11	86521200	86521400	GP1BB	116727	chr5	126166200	126166400	DHCR24	298298	chr12	13363200	13363400	ZFP316	304293	chr5	48306800	48307000	GABRR2	29695
chr7	144626400	144626600	HOXC5	315341	chr12	9858600	9858800	GTF3A	246299	chr9	98085000	98085200	MLPH	316620	chr17	68560400	68560600	PFKP	60416	chr13	47614400	47614600	IL24	170819	chr13	83850600	83850800	MPZL1	360871
chr11	32858200	32858400	RUNX1	50662	chr17	15761600	15761800	FGD3	361223	chr4	109042400	109042600	CTNNA2	297357	chr3	9805000	9805200	TOR1A	266606	chr16	77153000	77153200	CSMD1	364634	chr18	60719600	60719800	LOC502176	502176
chr20	14185800	14186000	UPB1	116593	chr10	103201200	103201400	RPL38	689284	chr3	43116000	43116200	NR4A2	54278	chr3	5720400	5720600	DBH	25699	chr12	22189400	22189600	TFR2	288562	chr7	12561400	12561600	WDR18	314617
chr19	25134600	25134800	MISP3	304650	chr20	10037200	10037400	SLC37A1	294321	chr5	147146000	147146200	AZIN2	366473	chr5	76187800	76188000	GNG10	114119	chr20	7882000	7882200	FANCE	309643	chr11	71218400	71218600	MUC20	303886
chr7	117354200	117354400	SMPD5	100359829	chr19	52356800	52357000	ATP2C2	171496	chr1	261670200	261670400	CRTAC1	171438	chr15	33357000	33357200	CEBPE	25410	chr12	47790400	47790600	FAM222A	498193	chr7	12198000	12198200	MBD3	362834
chr3	124144200	124144400	ADRA1D	29413	chr5	159388000	159388200	PADI1	54282	chr3	1924600	1924800	CACNA1B	257648	chr11	31237800	31238000	RGD1562726	498060	chr14	9561000	9561200	NKX6-1	65193	chr1	198740400	198740600	ITGAL	308995
chr5	169189400	169189600	KLHL21	313743	chr9	98460200	98460400	ESPNL	301606	chr1	164426200	164426400	RPS3	140654	chr19	15068000	15068200	CESL1	501232	chr8	95388800	95389000	TBX18	315870	chr18	77303000	77303200	NFATC1	100361818
chr18	28444400	28444600	MZB1	291675	chr15	51212000	51212200	ENTPD4	361063	chr1	226435400	226435600	SYT7	59267	chr7	12764400	12764600	GRIN3B	170796	chr18	67628400	67628600	DCC	25311	chr7	130297200	130297400	ADM2	399475
chr3	43115800	43116000	NR4A2	54278	chr10	106966800	106967000	SOCS3	89829	chr2	189855200	189855400	NPR1	24603	chr2	196293400	196293600	TMOD4	295261	chr1	53051800	53052000	MPC1	171087	chr1	82496800	82497000	CCDC97	292724
chr1	78053400	78053600	MEIS3	361514	chr3	164655200	164655400	PTPN1	24697	chr12	13362000	13362200	ZFP316	304293	chr19	17285000	17285200	AKTIP	291906	chr19	44124600	44124800	CHST5	307859	chr20	4563800	4564000	C2	24231
chr7	57662600	57662800	TRHDE	366894	chr5	48306800	48307000	GABRR2	29695	chr20	8319200	8319400	CMTR1	309656	chr7	123160000	123160200	POLR3H	300088	chr5	61382400	61382600	ALDH1B1	298079	chr8	13242600	13242800	PIWIL4	689972
chr5	155398000	155398200	ZBTB40	362635	chr16	54319000	54319200	MTUS1	306487	chr7	144641000	144641200	HOXC4	24459	chr19	52034400	52034600	MLYCD	85239	chr10	91293600	91293800	SPATA32	287747	chr15	27851600	27851800	APEX1	79116
chr3	165040400	165040600	KCNG1	296395	chr16	36093800	36094000	HMGB2	29395	chr18	30901600	30901800	PCDHGB7	364844	chr4	176934600	176934800	ABCC9	25560	chr1	100669400	100669600	MYH14	308572	chr2	250824000	250824200	CLCA4L	499721
chr10	103891800	103892000	OTOP3	287821	chr6	110999600	110999800	ZDHHC22	299211	chr5	133712400	133712600	FOXE3	171302	chr3	159938400	159938600	HNF4A	25735	chr14	4350400	4350600	BARHL2	65050	chr10	85076600	85076800	TBKBP1	266764
chr19	6031800	6032000	CDH8	84408	chr7	130052800	130053000	TRABD	300142	chr1	131452000	131452200	NR2F2	113984	chr7	3320200	3320400	GDF11	29454	chr6	89292800	89293000	MDGA2	314180	chr8	47521000	47521200	OAF	315594
chr13	88995400	88995600	OLFML2B	304960	chr7	12561400	12561600	WDR18	314617	chr3	160558600	160558800	KCNS1	117023	chr20	5529200	5529400	PHF1	294287	chr1	280637600	280637800	EMX2	499380	chr17	21368200	21368400	ELOVL2	498728
chr12	13362800	13363000	ZFP316	304293	chr13	90977400	90977600	SLAMF8	289237	chr11	32858200	32858400	RUNX1	50662	chr2	188523800	188524000	MTX1	295241	chr17	8886600	8886800	PITX1	113983	chr6	129600200	129600400	PAPOLA	314417
chr8	62919600	62919800	STRA6	363071	chr3	4022400	4022600	EGFL7	245963	chr1	163443000	163443200	LRRC32	293135	chr6	136536600	136536800	RD3L	314467	chr3	160853400	160853600	MATN4	296358	chr1	266410000	266410200	CYP17A1	25146
chr20	6927000	6927200	PI16	294312	chr11	71216800	71217000	MUC20	303886	chrX	156227600	156227800	OLR1768	293878	chr7	142779000	142779200	ACVRL1	25237	chr5	147776400	147776600	LCK	313050	chr2	219590400	219590600	LRRC39	691307
chr3	14482200	14482400	GSN	296654	chr7	11078800	11079000	S1PR4	314649	chr14	83754600	83754800	SELENOM	498398	chr13	50994000	50994200	CHIT1	289032	chr8	93491200	93491400	TPBG	83684	chr10	103739200	103739400	TMEM104	303670
chr19	58550800	58551000	NTPCR	361443	chr11	82732400	82732600	TMEM41A	681708	chr1	143277600	143277800	CPEB1	293056	chr5	143109000	143109200	ZC3H12A	313587	chr7	117060000	117060200	MAPK15	286997	chr6	132964000	132964200	BEGAIN	79146
chr7	10991400	10991600	TLE2	299636	chr7	130297200	130297400	ADM2	399475	chr4	121595000	121595200	TXNRD3	297437	chr10	106298000	106298200	Sept9	83788	chr3	141406000	141406200	NKX2-2	366214	chr9	84211600	84211800	SGPP2	301543
chr1	150797000	150797200	NOX4	85431	chr8	23469200	23469400	RP9	363032	chr10	85555800	85556000	EPOP	691153	chr19	19403800	19404000	SNX20	307742	chr4	115014400	115014600	MTHFD2	680308	chr9	9944400	9944600	TUBB4A	29213
chr4	58250000	58250200	KLF14	312203	chr20	4563800	4564000	C2	24231	chr10	86687000	86687200	NR1D1	252917	chr19	26100600	26100800	JUNB	24517	chr4	48308600	48308800	KCND2	65180	chr5	145394000	145394200	GJB3	29585
chr5	169305200	169305400	TNFRSF25	500592	chr7	25911000	25911200	RIC8B	314681	chr1	33915000	33915200	IRX1	306659	chr10	92652400	92652600	ITGB3	29302	chr1	100340200	100340400	RGD1309036	292874	chr3	147964600	147964800	DEFB22	171412
chr5	63785600	63785800	NR4A3	58853	chr8	128631800	128632000	GORASP1	56082	chr8	98737600	98737800	ZIC1	64618	chr3	162866000	162866200	SULF2	311642	chr20	29510000	29510200	DDIT4	140942	chr3	80843200	80843400	MDK	81517
chr3	121660400	121660600	CHCHD5	296147	chr11	79722000	79722200	LPP	288010	chr1	256384000	256384200	CYP26A1	154985	chr2	141268200	141268400	MAML3	310405	chr12	47665200	47665400	GLTP	288707	chr17	68560400	68560600	PFKP	60416
chr7	31876600	31876800	TMPO	25359	chr10	67518400	67518600	RNF135	303350	chr13	90938000	90938200	VSIG8	289236	chr5	148398600	148398800	TINAGL1	94174	chr10	72272400	72272600	CA4	29242	chr3	160948600	160948800	PIGT	296360
chr6	124902800	124903000	GPR68	314386	chr5	57411000	57411200	AQP3	65133	chr10	89916200	89916400	DUSP3	498003	chr3	14018000	14018200	TRAF1	687813	chr4	94069800	94070000	GRID2	79220	chr5	76187800	76188000	GNG10	114119
chr10	105775000	105775200	JMJD6	360665	chr6	43888600	43888800	RRM2	362720	chr5	169494400	169494600	RPL22	81768	chr1	226245400	226245600	FEN1	84490	chr4	117964600	117964800	TGFA	24827	chr13	89349800	89350000	FCGR2B	289211
chr5	149056600	149056800	LAPTM5	89783	chr1	252456400	252456600	ANKRD22	294093	chr5	147776400	147776600	LCK	313050	chr13	26173800	26174000	PHLPP1	59265	chr7	11559200	11559400	DIRAS1	366826	chr5	157215800	157216000	PLA2G2D	298579
chr7	121800600	121800800	GRAP2	366962	chr19	52034400	52034600	MLYCD	85239	chr12	28381400	28381600	GALNT17	288611	chr12	48384800	48385000	DAO	114027	chr10	91048000	91048200	C1QL1	363686	chr3	175823800	175824000	SLCO4A1	171144
chr10	86305400	86305600	PPP1R1B	360616	chr15	34531000	34531200	CBLN3	501998	chr1	33917000	33917200	IRX1	306659	chr2	240685000	240685200	MANBA	310864	chr3	2802400	2802600	PHPT1	296571	chr15	33357000	33357200	CEBPE	25410
chr5	153502600	153502800	RUNX3	156726	chr1	266410000	266410200	CYP17A1	25146	chr20	7135000	7135200	HMGA1	117062	chr7	2901000	2901200	MYL6L	685867	chr6	99843000	99843200	GPX2	29326	chr19	25934600	25934800	GADD45GIP1	288916
chr3	160558600	160558800	KCNS1	117023	chr7	120982200	120982400	DNAL4	300078	chr1	47630000	47630200	FNDC1	308099	chr8	49748400	49748600	DSCAML1	315615	chr1	100590000	100590200	KCNC3	117101	chr14	80960200	80960400	DOK7	305448
chr10	13077000	13077200	PAQR4	302967	chr16	20396600	20396800	MAST3	688540	chr18	14016600	14016800	NOL4	307553	chr11	86356000	86356200	CLDN5	65131	chr19	19403800	19404000	SNX20	307742	chr5	158083200	158083400	ALDH4A1	641316
chr20	3989200	3989400	PSMB8	24968	chr10	103739200	103739400	TMEM104	303670	chr18	30808400	30808600	PCDHGA1	553129	chr1	79912400	79912600	IRF2BP1	308404	chr7	143227800	143228000	KRT75	300247	chr10	57267200	57267400	SLC25A11	64201
chr12	14092600	14092800	RADIL	304299	chr13	52107000	52107200	RNPEP	81761	chr18	83470800	83471000	NETO1	307206	chr4	168903800	168904000	GPRC5D	500349	chr3	95150400	95150600	WT1	24883	chrX	159170200	159170400	FHL1	25177
chr10	12879400	12879600	ZFP213	287094	chr1	86987600	86987800	HNRNPL	80846	chr7	31876800	31877000	TMPO	25359	chr5	152758800	152759000	MTFR1L	298549	chr4	109042400	109042600	CTNNA2	297357	chr7	123578200	123578400	PHETA2	688685
chr8	71167000	71167200	RBPMS2	503214	chr15	51500600	51500800	RHOBTB2	306004	chr20	14185800	14186000	UPB1	116593	chr9	16539200	16539400	CNPY3	685174	chr3	43116000	43116200	NR4A2	54278	chr20	10037200	10037400	SLC37A1	294321
chr1	112946800	112947000	GABRA5	29707	chr6	111113400	111113600	NGB	85382	chr1	216661800	216662000	CDKN1C	246060	chr2	188196800	188197000	MSTO1	295237	chr5	58163400	58163600	CCL27	362505	chr2	196293400	196293600	TMOD4	295261
chr10	85955800	85956000	ARL5C	497990	chr3	147964600	147964800	DEFB22	171412	chr15	45376200	45376400	DLEU7	290308	chr7	117265400	117265600	PLEC	64204	chr5	147146000	147146200	AZIN2	366473	chr8	52955000	52955200	NNMT	300691
chr4	113752000	113752200	SEMA4F	29745	chr7	60759800	60760000	MDM2	314856	chr2	145173200	145173400	MAB21L1	688394	chr8	70712200	70712400	PARP16	315760	chr1	261670200	261670400	CRTAC1	171438	chr19	52034400	52034600	MLYCD	85239
chr5	119903200	119903400	RAVER2	362551	chr7	121095800	121096000	APOBEC3	315137	chr7	31876600	31876800	TMPO	25359	chr13	26173600	26173800	PHLPP1	59265	chr1	164426200	164426400	RPS3	140654	chr15	18456600	18456800	ACOX2	252898
chr19	49171800	49172000	CDYL2	292044	chr5	152349000	152349200	SH3BGRL3	298544	chr16	21295200	21295400	CILP2	306356	chr1	91373600	91373800	CEBPA	24252	chr1	226435400	226435600	SYT7	59267	chr5	61379000	61379200	ALDH1B1	298079
chr11	64935800	64936000	POPDC2	360718	chr3	80843200	80843400	MDK	81517	chr3	124144400	124144600	ADRA1D	29413	chr20	10019200	10019400	RSPH1	361818	chr10	87081000	87081200	CCR7	287673	chr5	169526000	169526200	CHD5	691589
chr3	82544200	82544400	ALX4	296511	chr17	68560400	68560600	PFKP	60416	chr3	145032200	145032400	SYNDIG1	362235	chr7	11646000	11646200	GADD45B	299626	chr12	52376800	52377000	LRCOL1	100363238	chr5	167117400	167117600	GPR157	313725
chr17	44766800	44767000	HIST1H1B	680522	chr1	47163000	47163200	TMEM181	502228	chr4	56337400	56337600	LEP	25608	chr5	160420400	160420600	EFHD2	298609	chr2	189855200	189855400	NPR1	24603	chr4	176934600	176934800	ABCC9	25560
chr12	49348600	49348800	SGSM1	288743	chr2	140707200	140707400	MGST2	295037	chr1	169418600	169418800	TRIM6	293294	chr1	221300800	221301000	CDC42EP2	309175	chr11	32857400	32857600	RUNX1	50662	chr15	61687400	61687600	KBTBD7	100909827
chr18	30896600	30896800	PCDHGA10	498849	chr12	46809400	46809600	RPLP0	64205	chr7	57662400	57662600	TRHDE	366894	chr4	80357600	80357800	LOC500124	500124	chr18	30901600	30901800	PCDHGB7	364844	chr4	7069600	7069800	SMARCD3	296732
chr1	80664800	80665000	NECTIN2	308417	chr5	76187800	76188000	GNG10	114119	chr14	78312400	78312600	CRMP1	25415	chr17	10195000	10195200	UNC5A	60629	chr10	76361400	76361600	TRIM25	494338	chr3	22838200	22838400	NEK6	360161
chr9	15495000	15495200	TAF8	316216	chr3	175823800	175824000	SLCO4A1	171144	chr17	44558600	44558800	PRSS16	364719	chr8	55270400	55270600	PPP2R1B	315648	chr5	145304600	145304800	SMIM12	685634	chr1	185149600	185149800	NUCB2	59295
chr1	23907200	23907400	TCF21	252856	chr15	33357000	33357200	CEBPE	25410	chr3	172417400	172417600	GNAS	24896	chr20	5013400	5013600	VWA7	309611	chr2	113066400	113066600	GHSR	84022	chr10	92652400	92652600	ITGB3	29302
chr10	56576200	56576400	CLDN7	65132	chr19	19404000	19404200	SNX20	307742	chr12	14092400	14092600	RADIL	304299	chr3	7184800	7185000	GFI1B	311832	chr10	91063800	91064000	C1QL1	363686	chr8	130224000	130224200	LYZL4	363168
chr10	86490600	86490800	IKZF3	303511	chr10	106296800	106297000	Sept9	83788	chr5	169464200	169464400	HES3	64628	chr2	240684800	240685000	MANBA	310864	chr7	61797000	61797200	DYRK2	314862	chr1	225140000	225140200	MTA2	361724
chr1	216661600	216661800	CDKN1C	246060	chr1	91283800	91284000	CEBPG	25301	chr18	30820400	30820600	PCDHGA3	498847	chr13	71168200	71168400	RGS16	360857	chr10	73338000	73338200	TBX4	303399	chr5	148398600	148398800	TINAGL1	94174
chr3	14482400	14482600	GSN	296654	chr7	141503600	141503800	LIMA1	300228	chr5	63784800	63785000	NR4A3	58853	chr6	133584800	133585000	DLK1	114587	chr14	83754600	83754800	SELENOM	498398	chr17	15761800	15762000	FGD3	361223
chr1	80253000	80253200	ERCC1	292673	chr12	38124200	38124400	DENR	687565	chr20	10273600	10273800	NDUFV3	64539	chr10	98720200	98720400	MAP2K6	114495	chr1	78053600	78053800	MEIS3	361514	chr5	135994800	135995000	PLK3	58936
chr16	79698600	79698800	KBTBD11	306617	chr2	196293400	196293600	TMOD4	295261	chr7	34714000	34714200	USP44	314746	chr16	81950200	81950400	MCF2L	117020	chr1	143277600	143277800	CPEB1	293056	chr13	26173800	26174000	PHLPP1	59265
chr3	95150400	95150600	WT1	24883	chr14	17275000	17275200	NAAA	497009	chr6	8960000	8960200	SIX2	366542	chr20	5114800	5115000	GPANK1	415064	chr14	35596200	35596400	PDGFRA	25267	chr3	111547400	111547600	ITPKA	81677
chr12	51249400	51249600	MN1	498194	chr6	132620800	132621000	DEGS2	314438	chr10	109786200	109786400	NPB	259222	chr20	7880200	7880400	FANCE	309643	chr1	165890200	165890400	RELT	361615	chr14	105997400	105997600	PELI1	305549
chr5	164942200	164942400	MAD2L2	313702	chr3	9806400	9806600	TOR1A	266606	chr8	98737400	98737600	ZIC1	64618	chr17	15043600	15043800	LOC689316	689316	chr10	89185600	89185800	WNK4	287715	chr1	212262000	212262200	UTF1	681901
chr4	114859000	114859200	LOC500227	500227	chr9	113590800	113591000	RALBP1	84014	chr6	89292800	89293000	MDGA2	314180	chr2	23754400	23754600	LHFPL2	294643	chr18	30896000	30896200	PCDHGA10	498849	chr5	79213400	79213600	AKNA	362530
chr12	22189200	22189400	TFR2	288562	chr11	31237800	31238000	RGD1562726	498060	chr19	58519800	58520000	MAP10	307948	chr5	64912000	64912200	RNF20	313216	chr10	103799600	103799800	GRIN2C	24411	chr4	153390600	153390800	BCL2L13	312682
chr19	55520800	55521000	CBFA2T3	361431	chr5	138155800	138156000	SLC2A1	24778	chr4	181477200	181477400	KLHL42	500367	chr15	28731800	28732000	METTL3	361035	chr10	86687000	86687200	NR1D1	252917	chr8	55270400	55270600	PPP2R1B	315648
chr10	86490800	86491000	IKZF3	303511	chr15	61687400	61687600	KBTBD7	100909827	chr10	91175000	91175200	PLCD3	287745	chr5	79213400	79213600	AKNA	362530	chr8	98737600	98737800	ZIC1	64618	chr6	111113400	111113600	NGB	85382
chr9	100135200	100135400	GPR35	367315	chr5	169526000	169526200	CHD5	691589	chr1	136061200	136061400	SLCO3A1	140915	chr4	78374600	78374800	GIMAP1	312312	chr17	88216000	88216200	GPR158	291352	chr20	11396200	11396400	PFKL	25741
chr20	4852600	4852800	LTA	25008	chr5	148257600	148257800	COL16A1	366474	chr5	60515200	60515400	GRHPR	680021	chr14	85748200	85748400	XBP1	289754	chr10	48569000	48569200	ADORA2B	29316	chr1	168911000	168911200	OLR127	405911
chr1	87256800	87257000	DPF1	50545	chr2	188523800	188524000	MTX1	295241	chr10	73337800	73338000	TBX4	303399	chr6	11000600	11000800	MIR3558	100526575	chr12	28381400	28381600	GALNT17	288611	chr3	159580600	159580800	TOX2	311615
chr10	12879600	12879800	ZFP213	287094	chr3	22838200	22838400	NEK6	360161	chr4	50312200	50312400	FEZF1	500048	chr2	225650400	225650600	ABCA4	310836	chr10	82419400	82419600	XYLT2	64134	chr8	127709600	127709800	MIR26A	100314290
chr13	102774000	102774200	RGD1310587	360894	chr1	185149600	185149800	NUCB2	59295	chr12	13364000	13364200	ZFP316	304293	chr1	198286800	198287000	DOC2A	65031	chr1	33917000	33917200	IRX1	306659	chr14	85397800	85398000	EMID1	685462
chr10	82419200	82419400	XYLT2	64134	chr13	50994000	50994200	CHIT1	289032	chr7	57661600	57661800	TRHDE	366894	chr13	51004600	51004800	CHI3L1	89824	chr2	210378800	210379000	ALX3	365900	chr8	128631800	128632000	GORASP1	56082
chr2	210365000	210365200	ALX3	365900	chr20	7771800	7772000	ZFP523	361809	chr1	87046600	87046800	LGALS7	29518	chr18	55907400	55907600	SYNPO	60324	chr6	46631000	46631200	SOX11	84046	chr13	35538000	35538200	RALB	116546
chr10	90154200	90154400	HDAC5	84580	chr10	106298000	106298200	2021-09-09	#N/A	chr8	98735600	98735800	ZIC1	64618	chr6	109047200	109047400	EIF2B2	84005	chr1	270473000	270473200	SORCS1	309533	chr1	79912400	79912600	IRF2BP1	308404
chr19	25899400	25899600	NF1X	81524	chr17	78911600	78911800	ACBD7	361277	chr4	94068200	94068400	GRID2	79220	chr5	151202600	151202800	AHDC1	362617	chr13	102631000	102631200	HLX	364069	chr12	24457200	24457400	FZD9	266608
chr4	182745400	182745600	RPS4Y2	690845	chr10	92652400	92652600	ITGB3	29302	chr6	46631400	46631600	SOX11	84046	chr1	170154000	170154200	OLR200	293340	chr19	52086800	52087000	NECAB2	170928	chr4	169992600	169992800	GRIN2B	24410
chr3	159322200	159322400	SRSF6	362264	chr8	122594600	122594800	TRIM71	301042	chr1	196866000	196866200	NSMCE1	361645	chr3	164422000	164422200	CEBPB	24253	chr20	1980800	1981000	GABBR1	81657	chr10	85761000	85761200	LASP1	29278
chr1	81365200	81365400	CADM4	365216	chr1	226245400	226245600	FEN1	84490	chr16	67047800	67048000	UNC5D	306534	chr11	33836000	33836200	CBR1	29224	chr5	144161400	144161600	EVA1B	362597	chr6	137668400	137668600	GPR132	314480
chr3	164275200	164275400	SNAI1	116490	chr3	111547400	111547600	ITPKA	81677	chr6	39363200	39363400	LRATD1	313969	chr16	10699000	10699200	FAM25A	684972	chr18	83470800	83471000	NETO1	307206	chr20	5153200	5153400	PRRC2A	294250
chr8	120446200	120446400	ARPP21	363153	chr2	220536400	220536600	PALMD	310811	chr7	61797000	61797200	DYRK2	314862	chr9	15622000	15622200	GUCA1B	316218	chr7	31876800	31877000	TMPO	25359	chr9	16539200	16539400	CNPY3	685174
chr5	62164800	62165000	TRIM14	313236	chr7	36647800	36648000	NUDT4	94267	chr20	4330000	4330200	NOTCH4	406162	chr4	157170400	157170600	LPCAT3	362434	chr20	14185800	14186000	UPB1	116593	chr6	124801400	124801600	DGLUCY	362769
chr7	130050200	130050400	PANX2	362979	chr9	113509600	113509800	RAB31	246324	chr18	30880400	30880600	PCDHGA9	252895	chr20	4539000	4539200	CFB	294257	chr9	17844800	17845000	TMEM151B	301253	chr10	73902400	73902600	MIR21	100314000
chr5	58394000	58394200	DNAJB5	313811	chr14	105997400	105997600	PELI1	305549	chr2	78825600	78825800	March11	499558	chr5	61385000	61385200	ALDH1B1	298079	chr8	15012800	15013000	FAT3	191571	chr1	91373600	91373800	CEBPA	24252
chr1	221684400	221684600	CDC42BPG	293693	chr3	165742800	165743000	ZFP64	311661	chr1	80378400	80378600	MARK4	680407	chr18	76749200	76749400	HSBP1L1	100192205	chr1	174411200	174411400	NRIP3	361625	chr10	103803200	103803400	GRIN2C	24411
chr1	169409800	169410000	TRIM6	293294	chr3	79909000	79909200	SPI1	366126	chr5	140889400	140889600	NT5C1A	313574	chr10	45927000	45927200	OLR1462	405993	chr1	216682800	216683000	SLC22A18	309131	chr17	13509200	13509400	SEMA4D	306790
chr4	127809000	127809200	SUCLG2	362404	chr15	35109600	35109800	CTSG	290257	chr7	120273000	120273200	GALR3	29235	chr5	153522000	153522200	RUNX3	156726	chr1	52908200	52908400	TBXT	292301	chr7	11646000	11646200	GADD45B	299626
chr9	98085000	98085200	MLPH	316620	chr12	48384800	48385000	DAO	114027	chr16	21274400	21274600	TSSK6	290670	chr8	119156600	119156800	TMIE	501061	chr5	60184600	60184800	PAX5	500453	chr8	129222400	129222600	RPL14	65043
chr1	15299600	15299800	SLC35D3	308717	chr1	225186000	225186200	AHNAK	191572	chr2	56892200	56892400	GDNF	25453	chr5	139615800	139616000	CITED4	114491	chr16	21295200	21295400	CILP2	306356	chr10	82400400	82400600	XYLT2	64134
chr2	140445600	140445800	MGARP	689931	chr7	107710400	107710600	CCN4	65154	chr12	9469200	9469400	CDX2	66019	chr20	5477000	5477200	TAPBP	25217	chr14	80731200	80731400	ADRA2C	24175	chr3	4022400	4022600	EGFL7	245963
chr7	140308400	140308600	CACNB3	25297	chr20	3549400	3549600	DDR1	25678	chr10	46568600	46568800	SREBF1	78968	chr11	36545800	36546000	LCA5L	498065	chr7	54248800	54249000	PHLDA1	29380	chr3	64528200	64528400	ZFP385B	311137
chr12	49339400	49339600	SGSM1	288743	chr20	11396200	11396400	PFKL	25741	chr6	42632600	42632800	ATP6V1C2	362802	chr10	107369400	107369600	CEP295NL	498028	chr3	145032200	145032400	SYNDIG1	362235	chr19	25311400	25311600	MIR23A	100314228
chr3	160853200	160853400	MATN4	296358	chr1	239072800	239073000	GDA	83585	chr12	13362200	13362400	ZFP316	304293	chr7	117262200	117262400	PLEC	64204	chr3	152912600	152912800	TGIF2	499929	chr20	10238800	10239000	WDR4	690032
chr10	106974800	106975000	SOCS3	89829	chr3	159580600	159580800	TOX2	311615	chr11	31391600	31391800	OLIG2	304103	chr16	69248400	69248600	ZFP703	680717	chr2	145173200	145173400	MAB21L1	688394	chr11	71216800	71217000	MUC20	303886
chr7	11181000	11181200	DOHH	314644	chr8	127709600	127709800	MIR26A	100314290	chr3	15430000	15430200	LHX6	311901	chr5	76188000	76188200	GNG10	114119	chr1	169418600	169418800	TRIM6	293294	chr20	7785400	7785600	DEF6	309642
chr10	106975600	106975800	SOCS3	89829	chr7	2901000	2901200	MYL6L	685867	chr8	30479600	30479800	NTM	50864	chr10	106191800	106192000	Sept9	83788	chr14	78312400	78312600	CRMP1	25415	chr20	5013400	5013600	VWA7	309611
chr10	91431400	91431600	ARHGAP27	303583	chr7	117262200	117262400	PLEC	64204	chr16	19223200	19223400	KLF2	306330	chr13	51969400	51969600	ARL8A	498234	chr1	221758800	221759000	PYGM	24701	chr10	106296800	106297000	Sept9	83788
chr5	140889400	140889600	NT5C1A	313574	chr14	85397800	85398000	EMID1	685462	chr3	43115800	43116000	NR4A2	54278	chr3	140090600	140090800	NAA20	362228	chr12	51249400	51249600	MN1	498194	chr1	100511000	100511200	EMC10	292878
chr8	119566400	119566600	TRANK1	316022	chr2	196310200	196310400	LYSMD1	499671	chr13	84012200	84012400	CD247	25300	chr1	7219600	7219800	PLAGL1	25157	chr1	209636400	209636600	EBF3	361668	chr16	14347000	14347200	CDHR1	93662
chr8	116058400	116058600	CISH	83681	chr13	35538000	35538200	RALB	116546	chr6	28235000	28235200	DNMT3A	444984	chr14	7108200	7108400	HSD17B13	305150	chr7	120401600	120401800	SOX10	29361	chr3	165742800	165743000	ZFP64	311661
chrX	156228200	156228400	OLR1768	293878	chr1	79912400	79912600	IRF2BP1	308404	chr18	30901400	30901600	PCDHGB7	364844	chr1	91374400	91374600	CEBPA	24252	chr12	14092400	14092600	RADIL	304299	chr7	121095600	121095800	APOBEC3	315137
chr10	86283800	86284000	NEUROD2	54276	chr19	10642600	10642800	CX3CL1	89808	chr13	88995400	88995600	OLFML2B	304960	chr19	25821600	25821800	LYL1	304663	chr18	30820400	30820600	PCDHGA3	498847	chr4	56714400	56714600	FLNC	362332
chr8	117250200	117250400	CCDC71	498678	chr3	11679600	11679800	ENG	497010	chr1	91673400	91673600	CEP89	292811	chr10	19669200	19669400	SPDL1	303037	chr20	10273600	10273800	NDUFV3	64539	chr12	45712800	45713000	SRRM4	498189
chr16	19914400	19914600	PLVAP	56765	chr4	100259400	100259600	VAMP8	83730	chr12	46974600	46974800	TRIAP1	691278	chr2	116168800	116169000	GPR160	499588	chrX	156228200	156228400	OLR1768	293878	chr7	11078800	11079000	S1PR4	314649
chr4	113752200	113752400	SEMA4F	29745	chr12	24457200	24457400	FZD9	266608	chr10	91045800	91046000	C1QL1	363686	chr11	31225200	31225400	RGD1562726	498060	chr6	8960000	8960200	SIX2	366542	chr12	47408400	47408600	HNF1A	24817
chr1	216648200	216648400	CDKN1C	246060	chr2	27355800	27356000	POLK	171525	chr7	57662600	57662800	TRHDE	366894	chr5	151907400	151907600	PIGV	366478	chr6	135874200	135874400	EXOC3L4	299338	chr12	40879600	40879800	RPL6	117042
chr16	21295000	21295200	CILP2	306356	chr10	29073400	29073600	C1QTNF2	497886	chr2	5592800	5593000	NR2F1	81808	chr5	169526000	169526200	CHD5	691589	chr10	109786200	109786400	NPB	259222	chr3	164664400	164664600	PTPN1	24697
chr10	88497800	88498000	CNP	25275	chr17	16223000	16223200	PHF2	306814	chr3	145031800	145032000	SYNDIG1	362235	chr3	162866200	162866400	SULF2	311642	chr20	8395600	8395800	CCDC167	689755	chr6	11000600	11000800	MIR3558	100526575
chr1	247476800	247477000	INSL6	50546	chr17	9836200	9836400	RAB24	361208	chr9	97064000	97064200	GBX2	114500	chr2	140303200	140303400	NOCT	310395	chr9	43337400	43337600	ZAP70	301348	chr1	100576000	100576200	NAPSA	60575
chr1	32639400	32639600	IRX4	306655	chr10	85761000	85761200	LASP1	29278	chr5	169465000	169465200	HES3	64628	chr1	78938400	78938600	CCDC8	494320	chr8	49738400	49738600	DSCAML1	315615	chr17	15043600	15043800	LOC689316	689316
chr5	164970600	164970800	FBXO44	500587	chr5	74942400	74942600	AKAP2	298024	chr1	84080400	84080600	NUMBL	292732						chr5	166514200	166514400	CLSTN1	313717	chr10	13870000	13870200	CASKIN1	140722
chr14	107607600	107607800	B3GNT2	305571	chr8	130019600	130019800	TRAK1	316085	chr1	33914400	33914600	IRX1	306659						chr19	58519800	58520000	MAP10	307948	chr20	5529200	5529400	PHF1	294287
chr12	28381000	28381200	GALNT17	288611	chr11	33836000	33836200	CBR1	29224	chr10	27366000	27366200	GABRA1	29705						chr17	8607400	8607600	RGD1562024	498699	chr2	23754400	23754600	LHFPL2	294643
chr18	30896000	30896200	PCDHGA10	498849	chr7	137157000	137157200	ANO6	315272	chr3	56768400	56768600	SP5	296510						chr5	14894200	14894400	SOX17	312936	chr7	129610800	129611000	ZDHHC25	300323
chr19	6032000	6032200	CDH8	84408	chr6	124436800	124437000	TTC7B	362768	chr8	127186600	127186800	GOLGA4	501069						chr10	91175000	91175200	PLCD3	287745	chr11	74309000	74309200	HES1	29577
chr11	32857200	32857400	RUNX1	50662	chr6	124801400	124801600	DGLUCY	362769	chr6	95817200	95817400	SIX6	314221						chr6	146786800	146787000	SP8	299499	chr1	261975600	261975800	PYROXD2	309381
chr3	165021400	165021600	KCNG1	296395	chr9	46192800	46193000	TBC1D8	680133	chr5	61382600	61382800	ALDH1B1	298079						chr6	71349000	71349200	PRKD1	85421	chr20	14627800	14628000	GNAZ	25740
chr1	177495600	177495800	TEAD1	361630	chr10	67863400	67863600	CDK5R1	116671	chr19	6032600	6032800	CDH8	84408						chr14	4372200	4372400	BARHL2	65050	chr13	51004600	51004800	CHI3L1	89824
chr10	90551000	90551200	FZD2	64512	chr13	50440000	50440200	SOX13	289026	chr15	62198200	62198400	PCDH8	64865						chr10	101289000	101289200	SOX9	140586	chr1	80028000	80028200	FBXO46	292686
chr9	43337400	43337600	ZAP70	301348	chr14	5102600	5102800	LRRC8D	305131	chr16	21295000	21295200	CILP2	306356						chr1	203971400	203971600	GPR26	192153	chr17	9228400	9228600	TIFAB	364674
chr5	166514200	166514400	CLSTN1	313717	chr19	55110000	55110200	ZFPM1	691504	chr20	7724600	7724800	SCUBE3	294297						chr3	142391800	142392000	FOXA2	25099	chr20	4610600	4610800	NEU1	24591
chr1	203971400	203971600	GPR26	192153	chr3	162866000	162866200	SULF2	311642	chr5	107825000	107825200	CDKN2A	25163						chr8	98735600	98735800	ZIC1	64618	chr3	43243400	43243600	GPD2	25062
chr20	14283200	14283400	ADORA2A	25369	chr13	26173600	26173800	PHLPP1	59265	chr5	63785600	63785800	NR4A3	58853						chr20	13971200	13971400	SUSD2	294335	chr7	120652800	120653000	TMEM184B	362959
chr14	104209200	104209400	SPRED2	305539	chr1	91373600	91373800	CEBPA	24252	chr5	169270800	169271000	TNFRSF25	500592						chr4	94068200	94068400	GRID2	79220	chr10	85992000	85992200	STAC2	363674
chr1	80378400	80378600	MARK4	680407	chr2	187228200	187228400	SH2D2A	310688	chr1	101526200	101526400	PLEKHA4	308584						chr1	56168200	56168400	DACT2	308212	chr16	10699000	10699200	FAM25A	684972
chr1	80253200	80253400	ERCC1	292673	chr20	10019200	10019400	RSPH1	361818	chr19	25143200	25143400	MISP3	304650						chr1	196866000	196866200	NSMCE1	361645	chr8	114941200	114941400	ALAS1	65155
chr16	21294400	21294600	CILP2	306356	chr17	13509200	13509400	SEMA4D	306790	chr19	31031200	31031400	FREM3	307767						chr20	55604000	55604200	SIM1	309888	chr8	45358200	45358400	UBASH3B	315579
chr6	132239800	132240000	CYP46A1	362782	chr12	15909600	15909800	GNA12	81663	chr1	85492600	85492800	SELENOV	499113						chr18	61639200	61639400	RAX	114213	chr5	158083000	158083200	ALDH4A1	641316
chr10	106221400	106221600	Sept9	83788	chr1	8897200	8897400	GJE1	681263	chr1	72546600	72546800	SHISA7	691429						chr16	67047800	67048000	UNC5D	306534	chr16	20525600	20525800	PGPEP1	290648
chr12	13362000	13362200	ZFP316	304293	chr5	141008000	141008200	OXCT2A	100361036	chr1	216648200	216648400	CDKN1C	246060						chr2	186875000	186875200	ETV3	295297	chr3	9035200	9035400	IER5L	499772
chr6	25620800	25621000	FOSL2	25446	chr8	45358200	45358400	UBASH3B	315579	chr2	181874000	181874200	RBM46	310548						chr9	99999400	99999600	GPC1	58920	chr16	19233000	19233200	KLF2	306330
chr1	247476600	247476800	INSL6	50546	chr4	80357600	80357800	LOC500124	500124	chr11	86521800	86522000	GP1BB	116727						chr20	4389600	4389800	PPT2	54398	chr14	87457000	87457200	IGFBP1	25685
chr3	9630600	9630800	RGD1311084	311852	chr19	58825400	58825600	KCNK1	59324	chr20	13971200	13971400	SUSD2	294335						chr5	48562200	48562400	RNGTT	313131	chr20	22468400	22468600	EGR2	114090
chr18	30881600	30881800	PCDHGA9	252895	chr7	11441000	11441200	ZBTB7A	117107	chr16	20683600	20683800	CRLF1	290655						chr11	32858200	32858400	RUNX1	50662	chr10	109104800	109105000	BAIAP2	117542
chr19	52105800	52106000	NECAB2	170928	chr11	68201000	68201200	SLC49A4	303902	chr12	47807800	47808000	FAM222A	498193						chr7	120273000	120273200	GALR3	29235	chr4	148805000	148805200	RASSF4	362423
chr4	99205800	99206000	CD8B	24931	chr4	153390600	153390800	BCL2L13	312682	chr20	9928600	9928800	TMPRSS3	309665						chr2	121165600	121165800	SOX2	499593	chr5	153522000	153522200	RUNX3	156726
chr7	117146600	117146800	NRBP2	680451	chr1	261975400	261975600	PYROXD2	309381	chr17	52568800	52569000	GLI3	140588						chr3	110500400	110500600	PLCB2	85240	chr8	119156600	119156800	TMIE	501061
chr6	78540000	78540200	FOXA1	25098	chr20	5153400	5153600	PRRC2A	294250	chr1	226435200	226435400	SYT7	59267						chr17	86199400	86199600	PTF1A	117034	chr7	141503800	141504000	LIMA1	300228
chr5	57899400	57899600	MYORG	366360	chr3	15542200	15542400	PTGS1	24693	chr7	141053000	141053200	TMBIM6	24822						chr5	58169000	58169200	CCL27	362505	chr10	105635600	105635800	CYGB	170520
chr7	12609800	12610000	KISS1R	78976	chr5	157206600	157206800	PLA2G2F	690388	chr5	98468800	98469000	LURAP1L	362535						chr11	31391600	31391800	OLIG2	304103	chr3	176475200	176475400	ARFGAP1	246310
chr6	69971800	69972000	FOXG1	24370	chr7	121095600	121095800	APOBEC3	315137	chr2	116526600	116526800	EGFEM1	310269						chr8	30479600	30479800	NTM	50864	chr5	166852600	166852800	LOC100125366	100125366
chr1	222191000	222191200	KCNK4	116489	chr7	143347600	143347800	KRT71	683613	chr7	57663000	57663200	TRHDE	366894						chr3	124144200	124144400	ADRA1D	29413	chr11	68201000	68201200	SLC49A4	303902
chr7	11302600	11302800	TJP3	314640	chr13	51004600	51004800	CHI3L1	89824	chr13	51136800	51137000	MYOG	29148						chr15	345200	345400	KCNMA1	83731	chr1	163386000	163386200	GUCY2D	113911
chr17	33957000	33957200	FOXC1	364706	chr12	50380400	50380600	TPST2	288719	chr10	43071200	43071400	GALNT10	170501						chr1	243477800	243478000	DMRT1	114498	chr3	140090600	140090800	NAA20	362228
chr1	84139600	84139800	LTBP4	292734	chr20	5114800	5115000	GPANK1	415064	chr19	55520800	55521000	CBFA2T3	361431						chr10	58833600	58833800	SLC13A5	266998	chr14	7108200	7108400	HSD17B13	305150
chr18	30914000	30914200	PCDHGA12	498850	chr19	25311600	25311800	MIR23A	100314228	chr3	61669000	61669200	HOXD3	288152						chr8	22993600	22993800	RGL3	300444	chr10	57179400	57179600	MINK1	303259
chr6	43021600	43021800	HPCAL1	50871	chr17	9167000	9167200	NEUROG1	29410	chr19	26026600	26026800	DNASE2	171575						chr18	28444400	28444600	MZB1	291675	chr12	38002200	38002400	VPS37B	288659
chr14	25590000	25590200	EPHA5	79208	chr3	164422000	164422200	CEBPB	24253	chr7	11559200	11559400	DIRAS1	366826						chr2	189855000	189855200	NPR1	24603	chr12	17310800	17311000	GPER1	171104
chr4	99178400	99178600	CD8B	24931	chr3	94042000	94042200	RGD1563222	362175	chr1	102416000	102416200	KCNC1	25327						chr12	42507000	42507200	TBX3	353305	chr1	78938400	78938600	CCDC8	494320
chr2	22018800	22019000	ANKRD34B	499506	chr19	10643400	10643600	CX3CL1	89808	chr3	145032000	145032200	SYNDIG1	362235						chr3	43115800	43116000	NR4A2	54278	chr7	11752600	11752800	OAZ1	25502
chr2	211222400	211222600	SARS	266975	chr1	1942400	1942600	ZC3H12D	308266	chr7	144274200	144274400	ATP5MC2	171082						chr1	78053400	78053600	MEIS3	361514	chr20	31987200	31987400	HK1	25058
chr13	91071000	91071200	CRP	25419	chr15	108977400	108977600	PCCA	687008	chr14	4350200	4350400	BARHL2	65050						chr10	84292200	84292400	SKAP1	286975	chr10	91507400	91507600	PLEKHM1	303584
chr5	61382600	61382800	ALDH1B1	298079	chr11	74309000	74309200	HES1	29577	chr7	2848200	2848400	RNF41	362814						chr18	30901400	30901600	PCDHGB7	364844	chr15	48465400	48465600	EXTL3	56819
chr16	21343000	21343200	PBX4	361131	chr13	48909000	48909200	CDK18	289019	chr8	48085000	48085200	NECTIN1	192183						chr13	88995400	88995600	OLFML2B	304960	chr3	3944200	3944400	NOTCH1	25496
chr8	119566200	119566400	TRANK1	316022	chr15	33356200	33356400	CEBPE	25410	chr5	107825200	107825400	CDKN2A	25163						chr8	59607000	59607200	CHRNA3	25101	chrX	155845200	155845400	DKC1	170944
chr10	88497600	88497800	CNP	25275	chr12	38002200	38002400	VPS37B	288659	chr15	52326000	52326200	DMTN	361069						chr12	24732600	24732800	ABHD11	360831	chr19	52668400	52668600	CRISPLD2	171547
chr13	102630000	102630200	HLX	364069	chr16	7316400	7316600	SEMA3G	290562	chr7	57661800	57662000	TRHDE	366894						chr7	11589600	11589800	GNG7	58979	chr12	22278800	22279000	EPO	24335
chr1	124989400	124989600	TRPM1	361586	chr10	106297800	106298000	2021-09-09	#N/A	chr19	53045000	53045200	FOXC2	171356						chr12	46974600	46974800	TRIAP1	691278	chr9	113585800	113586000	RALBP1	84014
chr20	54522600	54522800	GRIK2	54257	chr10	56965400	56965600	ALOX15	81639	chr18	61641800	61642000	RAX	114213						chr10	91045800	91046000	C1QL1	363686	chr15	4568400	4568600	KCNK5	364241
chr1	87046600	87046800	LGALS7	29518	chr11	35766800	35767000	ERG	170909	chr17	11684000	11684200	MSX2	25483						chr7	130050400	130050600	PANX2	362979	chr5	160002400	160002600	ZBTB17	313666
chr1	73249400	73249600	FCAR	365183	chr7	2902400	2902600	MYL6L	685867	chr15	110075600	110075800	NALCN	266760						chr5	172350600	172350800	HES5	79225	chr7	144066200	144066400	PRR13	363004
chr4	160334600	160334800	PRMT8	688502	chr13	26163000	26163200	PHLPP1	59265	chr9	94280400	94280600	CHRND	54240						chr20	7931800	7932000	TEAD3	294299	chr10	13542400	13542600	ATP6V0C	170667
chr11	32857400	32857600	RUNX1	50662	chr18	55907400	55907600	SYNPO	60324	chr1	64334400	64334600	MIR935	100314272						chr1	216661800	216662000	CDKN1C	246060	chr8	49748400	49748600	DSCAML1	315615
chr3	15771800	15772000	OLR397	296663	chr20	3549600	3549800	DDR1	25678											chr10	106307400	106307600	Sept9	83788	chr1	282145800	282146000	MIR3084A-2	104797224
chr20	3891200	3891400	RT1-DOA	24984	chr10	83642200	83642400	PHOSPHO1	287644											chr3	145031800	145032000	SYNDIG1	362235	chr12	18527600	18527800	ASMT	246281
chr12	13362200	13362400	ZFP316	304293	chr12	38003000	38003200	VPS37B	288659											chr3	170547400	170547600	TFAP2C	362280	chr10	18955200	18955400	KCNIP1	65023
chr1	140867000	140867200	MFGE8	25277	chr7	12281000	12281200	RPS15	29285											chr6	99434400	99434600	HSPA2	60460	chr6	43888600	43888800	RRM2	362720
chr20	3102200	3102400	RT1-T18	406194	chr16	10699000	10699200	FAM25A	684972											chr6	104070800	104071000	GALNT16	362760	chr11	67296400	67296600	STFA3	288075
chr1	81292400	81292600	IRGC	308428	chr16	20294600	20294800	RPL18A	290641											chr5	155398000	155398200	ZBTB40	362635	chr15	34452200	34452400	LTB4R	59264
chr20	7241800	7242000	PACSIN1	29704	chr15	2346400	2346600	LRMDA	681383											chr1	86938000	86938200	NFKBIB	81525	chr2	32811600	32811800	CD180	294706
chr16	19223200	19223400	KLF2	306330	chr20	45419600	45419800	AMD1	81640											chr9	82618000	82618200	GMPPA	501167	chr7	2902400	2902600	MYL6L	362816
chr4	181477000	181477200	KLHL42	500367	chr14	2894800	2895000	EVI5	100360066											chr10	27366000	27366200	GABRA1	29705	chr16	9075200	9075400	VSTM4	361112
chrX	156226600	156226800	OLR1768	293878	chr1	99611200	99611400	CTU1	292847											chr3	14482200	14482400	GSN	296654	chr1	56679400	56679600	THBS2	292406
chr16	69240000	69240200	ZFP703	680717	chr18	28669000	28669200	CXXC5	291670											chr4	50312000	50312200	FEZF1	500048	chr1	198286800	198287000	DOC2A	65031
chr1	100343200	100343400	RGD1309036	292874	chr10	103739000	103739200	TMEM104	303670											chr7	10991400	10991600	TLE2	299636	chr1	87064400	87064600	CAPN12	308476
chr13	84012200	84012400	CD247	25300	chr7	144939800	144940000	GPR84	688730											chr7	57662600	57662800	TRHDE	366894	chr1	199609000	199609200	ITGAD	64350
chr4	168685200	168685400	CDKN1B	83571	chr3	155151200	155151400	PPP1R16B	680616											chr15	62198200	62198400	PCDH8	64865	chr9	84418200	84418400	MOGAT1	363261
chr1	91673400	91673600	CEP89	292811	chr1	141672200	141672400	ARPIN	308765											chr18	14015000	14015200	NOL4	307553	chr9	16668000	16668200	PTK7	301242
chr1	84080400	84080600	NUMBL	292732	chr17	78546600	78546800	FAM107B	498796											chr4	58250000	58250200	KLF14	312203	chr18	55907400	55907600	SYNPO	60324
chr20	10273400	10273600	NDUFV3	64539	chr8	61594800	61595000	SNX33	315696											chr9	82618400	82618600	GMPPA	501167	chr3	11921000	11921200	NIBAN2	#N/A
chr4	157745400	157745600	TAPBPL	297602	chr2	23754400	23754600	LHFPL2	294643											chr10	86283800	86284000	NEUROD2	54276	chr5	157330800	157331000	PLA2G2E	298581
chr3	61578400	61578600	HOXD13	288154	chr8	119156600	119156800	TMIE	501061											chr16	21295000	21295200	CILP2	306356	chr20	5087400	5087600	ABHD16A	361796
chr5	171647800	171648000	ARHGEF16	687105	chr1	188151000	188151200	ITPRIPL2	499253											chr5	63785600	63785800	NR4A3	58853	chr1	83409000	83409200	CYP2B21	292728
chr4	51843200	51843400	GPR37	117549	chr7	141503800	141504000	LIMA1	300228											chr13	73929400	73929600	NPHS2	170672	chr19	58825400	58825600	KCNK1	59324
chr20	7724600	7724800	SCUBE3	294297	chr9	14721200	14721400	TREM3	367215											chr7	117059800	117060000	MAPK15	286997	chr16	69025400	69025600	GOT1L1	306540
chr4	157836800	157837000	SCNN1A	25122	chr11	36545800	36546000	LCA5L	498065											chr4	56981800	56982000	TSPAN33	500065	chr5	57410800	57411000	AQP3	65133
chr2	258935800	258936000	ADGRL2	171447	chr1	227117800	227118000	LOC100910973	100910973											chr19	15840200	15840400	IRX3	307721	chr9	81451400	81451600	CXCR1	54258
chr1	221108800	221109000	LTBP3	83838	chr10	93519400	93519600	MRC2	498011											chr13	74268800	74269000	TOR3A	304884	chr13	50440000	50440200	SOX13	289026
chr20	5445600	5445800	B3GALT4	171079	chr1	102895200	102895400	LDHA	24533											chr5	49308200	49308400	CNR1	25248	chr14	35140800	35141000	KIT	64030
chr11	32858600	32858800	RUNX1	50662	chr10	5295000	5295200	TVP23A	360467											chr12	9501400	9501600	PDX1	29535	chr1	86987600	86987800	HNRNPL	80846
chrX	156227600	156227800	OLR1768	293878	chr5	76188000	76188200	GNG10	114119											chr17	8883800	8884000	PITX1	113983	chr10	106815400	106815600	SYNGR2	89815
chr1	260267800	260268000	BLNK	499356	chr10	103738400	103738600	TMEM104	303670											chr11	86521800	86522000	GP1BB	116727	chr3	13961000	13961200	PHF19	296653
chr4	177177800	177178000	ST8SIA1	25280	chr7	11772400	11772600	JSRP1	690423											chr3	95133800	95134000	WT1	24883	chr1	252456200	252456400	ANKRD22	294093
chr10	84112000	84112200	MIR196C	100314204	chr3	2645600	2645800	FUT7	296564											chr13	93535600	93535800	RGS7	54296	chr1	221530600	221530800	ARL2	65142
chr18	402000	402200	FUNDC2	361288	chr1	91374400	91374600	CEBPA	24252											chr17	85382200	85382400	SPAG6L	291340	chr1	82185600	82185800	MEGF8	114029
chr20	37588200	37588400	MSL3L2	309790	chr2	116168800	116169000	GPR160	499588											chr12	21831400	21831600	CLDN3	65130	chr15	51500600	51500800	RHOBTB2	306004
chr7	2848200	2848400	RNF41	362814	chr5	151907400	151907600	PIGV	366478											chr6	124902800	124903000	GPR68	314386	chr19	10400400	10400600	DRC7	291853
chr19	26026600	26026800	DNASE2	171575	chr5	157206400	157206600	PLA2G2F	690388											chr6	75074400	75074600	EGLN3	54702	chr4	168131400	168131600	BCL2L14	500348
chr1	102416000	102416200	KCNC1	25327	chr7	3320000	3320200	GDF11	29454											chr3	100787800	100788000	BDNF	24225	chr10	40497800	40498000	SLC36A3	303148
chr5	61382400	61382600	ALDH1B1	298079	chr3	171294600	171294800	PMEPA1	311676											chr6	8959800	8960000	SIX2	366542	chr10	93519400	93519600	MRC2	498011
chr19	38671600	38671800	CDH3	116777	chr15	33356600	33356800	CEBPE	25410											chr2	185851200	185851400	MAB21L2	680102	chr13	82224200	82224400	SCYL3	360866
chr16	69239600	69239800	ZFP703	680717	chr12	40499800	40500000	MAPKAPK5	498183											chr7	34714000	34714200	USP44	314746	chr13	89830600	89830800	F11R	116479
chr19	53045000	53045200	FOXC2	171356	chr17	23922000	23922200	GFOD1	306842											chr3	176281800	176282000	BHLHE23	499952	chr7	13042000	13042200	MIER2	362841
chr7	10991800	10992000	TLE2	299636	chr5	48303400	48303600	GABRR2	29695											chr10	85555600	85555800	EPOP	691153	chr16	69248400	69248600	ZFP703	680717
chr2	156793200	156793400	LOC302022	302022	chr3	10684200	10684400	GPR107	311857											chr13	51136800	51137000	MYOG	29148	chr3	79909000	79909200	SPI1	366126
					chr5	152758800	152759000	MTFR1L	298549											chr3	100771400	100771600	BDNF	24225	chr20	6113400	6113600	PNPLA1	361812
					chr3	2881400	2881600	LCN5	29552											chr10	43071200	43071400	GALNT10	170501	chr18	28426000	28426200	SLC23A1	50621
					chr2	140303200	140303400	NOCT	310395											chr1	243601200	243601400	DMRT3	293976	chr10	82100800	82101000	ABCC3	140668
					chr11	31709600	31709800	IFNGR2	360697											chr19	55520800	55521000	CBFA2T3	361431	chr9	98205000	98205200	LRRFIP1	367314
					chr5	64912000	64912200	RNF20	313216											chr10	105775000	105775200	JMJD6	360665	chr5	146427200	146427400	HMGB4	685271
																				chr14	4350200	4350400	BARHL2	65050	chr13	88349200	88349400	DDR2	685781
																				chr5	171311600	171311800	SMIM1	500595	chr9	16667800	16668000	PTK7	301242
																				chr6	95927200	95927400	SIX1	114634	chr18	76865800	76866000	KCNG2	307234
																				chr15	52326000	52326200	DMTN	361069	chr2	200205400	200205600	NOTCH2	29492
																				chr5	149056600	149056800	LAPTM5	89783	chr15	46629600	46629800	FAM167A	498533
																				chr10	86305400	86305600	PPP1R1B	360616	chr7	141110400	141110600	NCKAP5L	315297
																				chr18	61641800	61642000	RAX	114213	chr10	94574200	94574400	ICAM2	360647
																				chr5	153502600	153502800	RUNX3	156726	chr10	69727200	69727400	TMEM132E	287564
																				chr13	31081800	31082000	CDH7	29162	chr1	267203800	267204000	SH3PXD2A	309460
																				chr3	58170800	58171000	DLX1	296500	chr13	50933600	50933800	CHIT1	289032
																				chr1	64334400	64334600	MIR935	100314272	chr1	81842600	81842800	RABAC1	83583
																				chr1	131464200	131464400	NR2F2	113984	chr7	11074400	11074600	S1PR4	314649
																				chr8	71167000	71167200	RBPMS2	503214	chr12	47195400	47195600	CABP1	171051
																				chr7	125796200	125796400	ARHGAP8	300115	chr10	103210800	103211000	RPL38	689284
																				chr1	112946800	112947000	GABRA5	29707	chr14	21602800	21603000	VCSA2	289526
																				chr3	59990800	59991000	SP9	366078	chr2	207441600	207441800	WNT2B	116466
																				chr4	157745400	157745600	TAPBPL	297602	chr10	12938000	12938200	ZSCAN10	302962
																				chr10	85955800	85956000	ARL5C	497990	chr10	89081600	89081800	PLEKHH3	360634
																				chr12	5822600	5822800	FRY	304244	chr13	110090800	110091000	PPP2R5A	312754
																				chr18	54108600	54108800	MINAR2	291580	chr5	155208600	155208800	EPHB2	313633
																				chr20	5742800	5743000	UQCC2	361805	chr1	31619600	31619800	AHRR	498999
																				chr4	34968000	34968200	NXPH1	25501	chr1	47163000	47163200	TMEM181	502228
																				chr4	113752000	113752200	SEMA4F	29745	chr10	35319000	35319200	MAPK9	50658
																				chr5	153773800	153774000	RCAN3	362627	chr5	161878200	161878400	PRDM2	313678
																				chr19	49171800	49172000	CDYL2	292044	chr2	140707200	140707400	MGST2	295037
																				chr11	38273600	38273800	RIPK4	304053	chr9	18652000	18652200	RUNX2	367218
																				chr11	64935800	64936000	POPDC2	360718	chr10	61994000	61994200	HIC1	303310
																				chr2	247045800	247046000	UNC5C	362049	chr14	23496800	23497000	UBA6	305268
																				chr4	175432000	175432200	PDE3A	50678	chr10	10640000	10640200	PPL	302934
																				chr9	15495000	15495200	TAF8	316216	chr3	13960800	13961000	PHF19	296653
																				chr7	117582400	117582600	SCRT1	366951	chr15	2346400	2346600	LRMDA	681383
																				chr15	52244800	52245000	HR	60563	chr7	140655400	140655600	TUBA1A	64158
																				chr8	119135200	119135400	PRSS46	408245	chr10	107369400	107369600	CEP295NL	498028
																				chr7	143959200	143959400	AAAS	300259	chr12	5841800	5842000	FRY	304244
																				chr1	235167200	235167400	GNA14	309242	chr8	71931000	71931200	DAPK2	300799
																				chr6	42632600	42632800	ATP6V1C2	362802	chr12	48303200	48303400	SVOP	171442
																				chr5	14411800	14412000	RGS20	362477	chr1	89269600	89269800	FFAR2	292794
																				chr14	106859200	106859400	OTX1	25646	chr1	215853600	215853800	INS2	24506
																				chr1	216648000	216648200	CDKN1C	246060	chr10	56425000	56425200	SPEM2	497938
																				chr11	31391400	31391600	OLIG2	304103	chr10	16968200	16968400	DUSP1	114856
																				chr12	49348600	49348800	SGSM1	288743	chr1	48441400	48441600	SLC22A3	29504
																				chr6	132950400	132950600	BEGAIN	79146	chr2	198136600	198136800	PLEKHO1	310674
																				chr18	30896600	30896800	PCDHGA10	498849	chr7	144926600	144926800	GPR84	688730
																				chr1	33910600	33910800	IRX1	306659	chr14	104469200	104469400	RAB1A	81754
																				chr1	80664800	80665000	NECTIN2	308417	chr9	92526200	92526400	SLC16A14	316578
																				chr13	49313800	49314000	CNTN2	25356	chr5	169515200	169515400	CHD5	691589
																				chr7	57662400	57662600	TRHDE	366894	chr8	22204000	22204200	PDE4A	25638
																				chr1	23907200	23907400	TCF21	252856	chr10	94464600	94464800	SMARCD2	83833
																				chr1	264496000	264496200	PAX2	293992	chr5	126166200	126166400	DHCR24	298298
																				chr10	56576200	56576400	CLDN7	65132	chr20	31980600	31980800	HK1	25058
																				chr4	157406400	157406600	CD4	24932	chr3	94034800	94035000	RGD1563222	362175
																				chr1	216661600	216661800	CDKN1C	246060	chr1	89365800	89366000	HAMP	84604
																				chr1	25173000	25173200	CLVS2	361459	chr8	65701200	65701400	UACA	315732
																				chr2	229718800	229719000	UGT8	50555	chr3	6227400	6227600	RXRA	25271
																				chr5	48223000	48223200	RRAGD	297960	chr4	157170400	157170600	LPCAT3	362434
																				chr3	14482400	14482600	GSN	296654	chr8	36299600	36299800	ST3GAL4	363040
																				chr1	80253000	80253200	ERCC1	292673	chr11	71218600	71218800	MUC20	303886
																				chr6	137383400	137383600	CLBA1	362793	chr10	109193000	109193200	MIR3065	100526580
																				chr10	85062800	85063000	TBX21	303496	chr1	100578400	100578600	NAPSA	60575
																				chr15	33216800	33217000	AJUBA	85265	chr3	9805000	9805200	TOR1A	266606
																				chr20	9928600	9928800	TMPRSS3	309665	chr2	23287400	23287600	BHMT2	365972
																				chr3	1924400	1924600	CACNA1B	257648	chr20	18498600	18498800	CISD1	294362
																				chr12	22189200	22189400	TFR2	288562	chr1	12827000	12827200	CITED2	114490
																				chr17	44595000	44595200	POM121L2	502128	chr2	112877200	112877400	NCEH1	294930
																				chr3	100770000	100770200	BDNF	24225	chr14	7167600	7167800	KLHL8	289457
																				chr20	3890200	3890400	RT1-DOA	24984	chr8	115071000	115071200	DUSP7	300980
																				chr17	9731600	9731800	F12	306761	chr15	18457000	18457200	ACOX2	252898
																				chr14	80731800	80732000	ADRA2C	24175	chr12	9858600	9858800	GTF3A	246299
																				chr13	102774000	102774200	RGD1310587	360894	chr9	98460200	98460400	ESPNL	301606
																				chr6	95817200	95817400	SIX6	314221	chr16	54319000	54319200	MTUS1	306487
																				chr5	57899400	57899600	MYORG	366360	chr7	41301800	41302000	GALNT4	500826
																				chr14	77710600	77710800	MSX1	81710	chr19	25952200	25952400	RAD23A	361381
																				chr10	13081200	13081400	KREMEN2	287102	chr7	123576400	123576600	PHETA2	688685
																				chr3	170951000	170951200	BMP7	85272	chr17	9166800	9167000	NEUROG1	29410
																				chr15	62199200	62199400	PCDH8	64865	chr12	45012400	45012600	VSIG10	304529
																				chr13	51137200	51137400	MYOG	29148	chr7	1176000	1176200	ARL13B	304037
																				chr14	35582800	35583000	PDGFRA	25267	chr15	28731600	28731800	METTL3	361035
																				chr7	130826000	130826200	SYT10	60567	chr7	122998000	122998200	ZC3H7B	315158
																				chr10	90154200	90154400	HDAC5	84580	chr13	89349600	89349800	FCGR2B	289211
																				chr10	105498600	105498800	SPHK1	170897	chr10	45521000	45521200	IBA57	363611
																				chr4	115412000	115412200	ATP6V1B1	312488	chr11	79722000	79722200	LPP	288010
																				chr9	98085000	98085200	MLPH	316620	chr12	31614800	31615000	PIWIL1	363912
																				chr18	14015200	14015400	NOL4	307553	chr5	57411000	57411200	AQP3	65133
																				chr19	25899400	25899600	NF1X	81524	chr11	44201600	44201800	ST3GAL6	304023
																				chr6	119520000	119520200	FLRT2	299236	chr1	252456400	252456600	ANKRD22	294093
																				chr4	182745400	182745600	RPS4Y2	690845	chr6	132620800	132621000	DEGS2	314438
																				chr4	133951000	133951200	PDZRN3	312607	chr13	52107000	52107200	RNPEP	81761
																				chr3	159322200	159322400	SRSF6	362264	chr18	27191400	27191600	PKD2L2	291683
																				chr20	9596200	9596400	GLP1R	25051	chr12	45714000	45714200	SRRM4	498189
																				chr1	81365200	81365400	CADM4	365216	chr6	51270800	51271000	HBP1	27080
																				chr12	13363600	13363800	ZFP316	304293	chr7	60759800	60760000	MDM2	314856
																				chr1	56242400	56242600	SMOC2	292401	chr3	7119200	7119400	RALGDS	29622
																				chr12	13225600	13225800	KDELR2	304290	chr5	152349000	152349200	SH3BGRL3	298544
																				chr10	91046000	91046200	C1QL1	363686	chr12	51248000	51248200	MN1	498194
																				chr14	25590000	25590200	EPHA5	79208	chr1	105352800	105353000	NELL1	81733
																				chr18	30173000	30173200	PCDHAC2	393092	chr1	85316600	85316800	GMFG	113940
																				chr4	171250000	171250200	PTPRO	50677	chr11	31237800	31238000	RGD1562726	498060
																				chr1	33911000	33911200	IRX1	306659	chr13	90101400	90101600	CD48	245962
																				chr11	65845400	65845600	FSTL1	79210	chr19	19404000	19404200	SNX20	307742
																				chr3	98293200	98293400	KCNA4	25469	chr1	91283800	91284000	CEBPG	25301
																				chr3	22641400	22641600	LHX2	296706	chr3	11114800	11115000	PLPP7	296635
																				chr4	127809000	127809200	SUCLG2	362404	chr3	160838000	160838200	RBPJL	362268
																				chr3	58170600	58170800	DLX1	296500	chr19	17285000	17285200	AKTIP	291906
																				chr6	69972600	69972800	FOXG1	24370	chr8	128428400	128428600	SCN10A	29571
																				chr5	169494400	169494600	RPL22	81768	chr1	221754000	221754200	PYGM	24701
																				chr1	163443000	163443200	LRRC32	293135	chr2	188523800	188524000	MTX1	295241
																				chr16	71323600	71323800	FGFR1	79114	chr6	136536600	136536800	RD3L	314467
																				chr1	256383800	256384000	CYP26A1	154985	chr13	50994000	50994200	CHIT1	289032
																				chr14	45175000	45175200	KLF3	114845	chr20	7771800	7772000	ZFP523	361809
																				chr20	4330000	4330200	NOTCH4	406162	chr5	143109000	143109200	ZC3H12A	313587
																				chr2	220101000	220101200	PLPPR5	310812	chr17	78911600	78911800	ACBD7	361277
																				chr16	77152800	77153000	CSMD1	364634	chr4	10326400	10326600	FGL2	84586
																				chr3	160853200	160853400	MATN4	296358	chr4	83970000	83970200	TRIL	362364
																				chr5	82167800	82168000	ASTN2	100361323	chr2	141268200	141268400	MAML3	310405
																				chr10	106974800	106975000	SOCS3	89829	chr1	21853400	21853600	CCN2	64032
																				chr2	115678400	115678600	SLC7A14	499587	chr5	148257600	148257800	COL16A1	366474
																				chr20	19318200	19318400	PHYHIPL	309901	chr1	226245400	226245600	FEN1	84490
																				chr10	106975600	106975800	SOCS3	89829	chr2	220536400	220536600	PALMD	310811
																				chr5	140889400	140889600	NT5C1A	313574	chr4	157818600	157818800	LTBR	297604
																				chr8	119566400	119566600	TRANK1	316022	chr6	137375200	137375400	CLBA1	362793
																				chr6	99434800	99435000	HSPA2	60460	chr12	48384800	48385000	DAO	114027
																				chr1	100360800	100361000	RGD1309036	292874	chr20	3549400	3549600	DDR1	25678
																				chr16	20032000	20032200	NIBAN3	498604	chr5	151792600	151792800	GPN2	362614
																				chr9	94280400	94280600	CHRND	54240	chr7	2901000	2901200	MYL6L	362816
																				chr8	117250200	117250400	CCDC71	498678	chr4	153873000	153873200	SLC6A13	171163
																				chr5	144761800	144762000	TFAP2E	313596	chr4	168903800	168904000	GPRC5D	500349
																				chr16	19914400	19914600	PLVAP	56765	chr19	26100600	26100800	JUNB	24517
																				chr1	216648200	216648400	CDKN1C	246060	chr5	152758800	152759000	MTFR1L	298549
																				chr3	123176800	123177000	LZTS3	280670	chr2	196310200	196310400	LYSMD1	499671
																				chr7	140308400	140308600	CACNB3	25297	chr2	27355800	27356000	POLK	171525
																				chr2	233600000	233600200	PITX2	54284	chr10	106298000	106298200	Sept9	83788
																				chr5	133712200	133712400	FOXE3	171302	chr19	52485600	52485800	COTL1	361422
																				chr1	247476800	247477000	INSL6	50546	chr7	121227800	121228000	PDGFB	24628
																				chr12	42489600	42489800	TBX3	353305	chr17	16223000	16223200	PHF2	306814
																				chr17	72426600	72426800	GATA3	85471	chr17	9836200	9836400	RAB24	361208
																				chr15	12826200	12826400	FEZF2	305719	chr8	32013400	32013600	ADAMTS15	300474
																				chr12	23548600	23548800	ORAI2	304592	chr5	152233000	152233200	DHDDS	298541
																				chr11	28212800	28213000	GRIK1	29559	chr19	32198800	32199000	SMAD1	25671
																				chr1	32639400	32639600	IRX4	306655	chr4	157236200	157236400	MIR141	100314215
																				chr12	46915200	46915400	MSI1	259272	chr2	57193800	57194000	WDR70	294783
																				chr3	61597200	61597400	HOXD12	366082	chr16	81677200	81677400	GRTP1	361180
																				chr16	21058800	21059000	NCAN	58982	chr11	33836000	33836200	CBR1	29224
																				chr14	107607600	107607800	B3GNT2	305571	chr9	41069800	41070000	PRSS40	316318
																				chr11	86553800	86554000	TBX1	360737	chr20	12361000	12361200	SLC19A1	29723
																				chr16	75968200	75968400	ANGPT2	89805	chr10	67863400	67863600	CDK5R1	116671
																				chr19	38670600	38670800	CDH3	116777	chr10	5295000	5295200	TVP23A	360467
																				chr5	43604400	43604600	EPHA7	171287	chr15	51212000	51212200	ENTPD4	361063
																				chr18	30880600	30880800	PCDHGA9	252895	chr4	148848600	148848800	TMEM72	362424
																				chr18	56180200	56180400	ARSI	307404	chr3	162866000	162866200	SULF2	311642
																				chr14	80544000	80544200	HMX1	360960	chr8	128734800	128735000	CX3CR1	171056
																				chr3	176548600	176548800	CHRNA4	25590	chr13	26173600	26173800	PHLPP1	59265
																				chr17	18339800	18340000	NUP153	25281	chr2	187228200	187228400	SH2D2A	310688
																				chr10	103937800	103938000	HID1	287822	chr20	10019200	10019400	RSPH1	361818
																				chr8	61532400	61532600	CSPG4	81651	chr20	4803600	4803800	RT1-CE12	309600
																				chr5	82168000	82168200	ASTN2	100361323	chr10	106816200	106816400	SYNGR2	89815
																				chr1	85492600	85492800	SELENOV	499113	chr12	15909600	15909800	GNA12	81663
																				chr5	164977000	164977200	FBXO2	85273	chr6	132223600	132223800	CYP46A1	362782
																				chr16	19223000	19223200	KLF2	306330	chr1	199163000	199163200	CTF1	29201
																				chr3	3696200	3696400	QSOX2	681023	chr3	2688600	2688800	PTGDS	25526
																				chr12	47674200	47674400	GLTP	288707	chr16	20675600	20675800	REX1BD	306348
																				chr11	32656200	32656400	CLIC6	304081	chr5	141008000	141008200	OXCT2A	366463
																				chr10	90551000	90551200	FZD2	64512	chr1	221300800	221301000	CDC42EP2	309175
																				chr17	75992600	75992800	ECHDC3	684538	chr4	80357600	80357800	LOC500124	500124
																				chr2	228544400	228544600	TRAM1L1	310846	chr7	11441000	11441200	ZBTB7A	117107
																				chr7	144602400	144602600	HOXC8	24460	chr19	53737600	53737800	RGD1304884	307907
																				chr10	71158800	71159000	HNF1B	25640	chr1	1942400	1942600	ZC3H12D	308266
																				chr11	86556200	86556400	TBX1	360737	chr1	101095200	101095400	FCGRT	29558
																				chr7	117074200	117074400	FAM83H	362937	chr20	5153400	5153600	PRRC2A	294250
																				chr20	14283200	14283400	ADORA2A	25369	chr6	129596600	129596800	PAPOLA	314417
																				chr1	80378400	80378600	MARK4	680407	chr2	240684800	240685000	MANBA	310864
																				chr13	74268600	74268800	TOR3A	304884	chr3	15542200	15542400	PTGS1	24693
																				chr1	80253200	80253400	ERCC1	292673	chr6	132228400	132228600	CYP46A1	362782
																				chr11	86521200	86521400	GP1BB	116727	chr8	122596600	122596800	TRIM71	301042
																				chr6	109469400	109469600	JDP2	116674	chr12	38978600	38978800	ORAI1	304496
																				chr6	132239800	132240000	CYP46A1	362782	chr16	2683400	2683600	IL17RD	498576
																				chr3	1924600	1924800	CACNA1B	257648	chr12	50380400	50380600	TPST2	288719
																				chr15	62200000	62200200	PCDH8	64865	chr20	5114800	5115000	GPANK1	415064
																				chr15	52325800	52326000	DMTN	361069	chr20	50191600	50191800	PREP	83471
																				chr3	141577800	141578000	PAX1	311505	chr3	9035000	9035200	IER5L	499772
																				chr20	29523800	29524000	DDIT4	140942	chr19	25311600	25311800	MIR23A	100314228
																				chr12	13362000	13362200	ZFP316	304293	chr17	9167000	9167200	NEUROG1	29410
																				chr6	25620800	25621000	FOSL2	25446	chr3	164422000	164422200	CEBPB	24253
																				chr6	48452200	48452400	MYT1L	116668	chr3	94042000	94042200	RGD1563222	362175
																				chr20	8319200	8319400	CMTR1	309656	chr19	10643400	10643600	CX3CL1	89808
																				chr3	10351400	10351600	ASS1	25698	chr5	126347400	126347600	FAM151A	313430
																				chr12	47807800	47808000	FAM222A	498193	chr1	222363600	222363800	FLRT1	499308
																				chr1	131452000	131452200	NR2F2	113984	chr3	162866200	162866400	SULF2	311642
																				chr5	147306000	147306200	HPCA	29177	chr3	102980200	102980400	OLR774	405233
																				chr17	13670600	13670800	SHC3	114858	chr10	75096000	75096200	MPO	303413
																				chr1	90684200	90684400	CHST8	308511	chr11	35766800	35767000	ERG	170909
																				chr3	160558600	160558800	KCNS1	117023	chr7	142355000	142355200	GALNT6	100361647
																				chr7	57662200	57662400	TRHDE	366894	chr20	3549600	3549800	DDR1	25678
																				chr15	71778800	71779000	PCDH20	306081	chr7	12281000	12281200	RPS15	29285
																				chr1	220847000	220847200	CTSW	293676	chr12	24655400	24655600	VPS37D	687208
																				chr6	71349200	71349400	PRKD1	85421	chr5	59507400	59507600	CLTA	83800
																				chr16	21290400	21290600	CILP2	306356	chr10	19669200	19669400	SPDL1	303037
																				chr10	85555800	85556000	EPOP	691153	chr20	3889800	3890000	RT1-DOA	24984
																				chr5	159333400	159333600	PADI3	29520	chr2	188671400	188671600	ADAM15	57025
																				chr14	3872200	3872400	HFM1	690161	chr13	24846800	24847000	CDH20	363948
																				chr7	140453000	140453200	WNT10B	315294	chr7	11581600	11581800	GNG7	58979
																				chr1	33915000	33915200	IRX1	306659	chr5	154392800	154393000	RPL11	362631
																				chr7	12609800	12610000	KISS1R	78976	chr9	15622000	15622200	GUCA1B	316218
																				chr9	82062600	82062800	WNT10A	316527	chr16	20294600	20294800	RPL18A	290641
																				chr20	9596000	9596200	GLP1R	25051	chr7	10935800	10936000	ANKRD24	299639
																				chr7	11302600	11302800	TJP3	314640	chr1	166433400	166433600	STARD10	293150
																				chr3	123107000	123107200	OXT	25504	chr3	164041600	164041800	B4GALT5	362275
																				chr4	117294000	117294200	EGR4	25129	chr1	99611200	99611400	CTU1	292847
																				chr1	84139600	84139800	LTBP4	292734	chr18	76749200	76749400	HSBP1L1	100192205
																				chr5	153756200	153756400	NCMAP	689826	chr9	43120000	43120200	ANKRD23	316330
																				chr1	280635200	280635400	EMX2	499380	chr10	45927000	45927200	OLR1462	405993
																				chr18	30914000	30914200	PCDHGA12	498850	chr3	155151200	155151400	PPP1R16B	680616
																				chr18	59748600	59748800	ST8SIA3	25547	chr1	168470600	168470800	OLR94	405908
																				chr1	47630000	47630200	FNDC1	308099	chr16	62484400	62484600	PURG	361162
																				chr11	31422200	31422400	OLIG1	60394	chr2	189854600	189854800	NPR1	24603
																				chr13	51954600	51954800	PTPRV	64576	chr10	105635800	105636000	CYGB	170520
																				chr1	88896600	88896800	APLP1	502317	chr19	57665400	57665600	SPRTN	292101
																				chr8	108104200	108104400	SOX14	300954	chr1	212607400	212607600	SPRN	541462
																				chr4	83971200	83971400	TRIL	362364	chr20	12364000	12364200	SLC19A1	29723
																				chr4	177177800	177178000	ST8SIA1	25280	chr1	239072800	239073000	GDA	83585
																				chr1	101776000	101776200	SULT2B1	292915	chr8	21813600	21813800	COL5A3	60379
																				chr1	78592400	78592600	ARHGAP35	306400	chr9	14721200	14721400	TREM3	367215
																				chr1	226435200	226435400	SYT7	59267	chr4	57932400	57932600	CPA5	408212
																				chr4	124856800	124857000	ADAMTS9	312566	chr5	48303400	48303600	GABRR2	29695
																				chr8	15011000	15011200	FAT3	191571	chr11	36545800	36546000	LCA5L	498065
																				chr2	211222400	211222600	SARS	266975	chr19	10635200	10635400	CCL17	117518
																				chr6	134626800	134627000	DIO3	29475	chr20	4406800	4407000	FKBPL	406168
																				chr3	43116400	43116600	NR4A2	54278	chr5	76188000	76188200	GNG10	114119
																				chr9	82584600	82584800	SPEG	363256	chr8	130019600	130019800	TRAK1	316085
																				chr4	430200	430400	EN2	499964	chr1	91374400	91374600	CEBPA	24252
																				chr7	119352400	119352600	CACNG2	84347	chr1	217357400	217357600	SHANK2	171093
																				chr10	56576000	56576200	CLDN7	65132	chr2	116168800	116169000	GPR160	499588
																				chr17	85372200	85372400	BMI1	307151	chr11	31225200	31225400	RGD1562726	498060
																				chr9	15502000	15502200	TAF8	316216	chr5	151907400	151907600	PIGV	366478
																				chr10	56861000	56861200	ALOX12	287454	chr5	157206400	157206600	PLA2G2F	690388
																				chr10	84112000	84112200	MIR196C	100314204	chr3	171294600	171294800	PMEPA1	311676
																				chr5	62164800	62165000	TRIM14	313236	chr17	23922000	23922200	GFOD1	306842
																				chr12	12385600	12385800	TECPR1	304285	chr3	10684200	10684400	GPR107	311857
																				chr11	31391200	31391400	OLIG2	304103	chr3	2881400	2881600	LCN5	29552
																				chr20	9233200	9233400	BTBD9	294318	chr2	140303200	140303400	NOCT	310395
																				chr1	80665000	80665200	NECTIN2	308417	chr7	139212000	139212200	ENDOU	680317
																				chr10	73279400	73279600	TBX2	303398	chr5	64912000	64912200	RNF20	313216
																				chr11	31833000	31833200	DONSON	288257
																				chr19	23386800	23387000	SALL1	307740
																				chr6	8947800	8948000	SIX2	366542
																				chr20	37588200	37588400	MSL3L2	309790
																				chr19	15840400	15840600	IRX3	307721
																				chr10	56576400	56576600	CLDN7	65132
																				chr1	87046600	87046800	LGALS7	29518
																				chr15	56958000	56958200	LRCH1	502020
																				chr8	98737400	98737600	ZIC1	64618
																				chr20	47307800	47308000	NR2E1	684085
																				chr6	46631200	46631400	SOX11	84046
																				chr4	181477200	181477400	KLHL42	500367
																				chr7	134603200	134603400	PPHLN1	366975
																				chr3	82553800	82554000	ALX4	296511
																				chr4	50312200	50312400	FEZF1	500048
																				chr3	160854200	160854400	MATN4	296358
																				chr11	34317800	34318000	SIM2	304071
																				chr11	28213000	28213200	GRIK1	29559
																				chr5	133708400	133708600	FOXE3	171302
																				chr7	24850200	24850400	POLR3B	362858
																				chr6	46631400	46631600	SOX11	84046
																				chr18	30896200	30896400	PCDHGA10	498849
																				chr7	2848200	2848400	RNF41	362814
																				chr6	49324600	49324800	SNTG2	298936
																				chr12	47665000	47665200	GLTP	288707
																				chr4	160334600	160334800	PRMT8	688502
																				chr17	53230000	53230200	HECW1	291209
																				chr16	79708000	79708200	KBTBD11	306617
																				chr6	39363200	39363400	LRATD1	313969
																				chr1	15299600	15299800	SLC35D3	308717
																				chr9	17224800	17225000	RSPH9	316238
																				chr16	20305200	20305400	SLC5A5	114613
																				chr5	148033200	148033400	PTP4A2	85237
																				chr2	229719000	229719200	UGT8	50555
																				chr2	28471000	28471200	FOXD1	171299
																				chr1	90685800	90686000	CHST8	308511
																				chr16	21294800	21295000	CILP2	306356
																				chr19	11043400	11043600	HERPUD1	85430
																				chr16	21274400	21274600	TSSK6	290670
																				chr2	56892200	56892400	GDNF	25453
																				chr6	104340200	104340400	PLEKHD1	500685
																				chr9	97060600	97060800	GBX2	114500
																				chr7	144274200	144274400	ATP5MC2	171082
																				chr12	13362200	13362400	ZFP316	304293
																				chr17	44594800	44595000	POM121L2	502128
																				chr4	56337400	56337600	LEP	25608
																				chr17	14825200	14825400	BARX1	364680
																				chr4	153816000	153816200	USP18	312688
																				chr5	144762000	144762200	TFAP2E	313596
																				chr15	62199400	62199600	PCDH8	64865
																				chr16	19223200	19223400	KLF2	306330
																				chr4	181477000	181477200	KLHL42	500367
																				chr3	56768800	56769000	SP5	296510
																				chr2	5576200	5576400	NR2F1	81808
																				chr14	60764200	60764400	LGI2	305417
																				chr5	109625600	109625800	ELAVL2	286973
																				chr13	84012200	84012400	CD247	25300
																				chr7	25040000	25040200	NUAK1	299694
																				chr10	23663400	23663600	EBF1	116543
																				chr9	97057400	97057600	GBX2	114500
																				chr5	107825200	107825400	CDKN2A	25163
																				chr6	28235000	28235200	DNMT3A	444984
																				chr1	91673400	91673600	CEP89	292811
																				chr3	100771600	100771800	BDNF	24225
																				chr5	133712400	133712600	FOXE3	171302
																				chr18	14016600	14016800	NOL4	307553
																				chr12	14092600	14092800	RADIL	304299
																				chr4	115701400	115701600	DYSF	312492
																				chr13	89765800	89766000	ARHGAP30	498282
																				chr4	7185800	7186000	GBX1	246149
																				chr1	11907400	11907600	RN5-8S	100861534
																				chr2	5592800	5593000	NR2F1	81808
																				chr12	17193200	17193400	UNCX	29375
																				chr3	145032000	145032200	SYNDIG1	362235
																				chr2	36246200	36246400	HTR1A	24473
																				chr1	84080400	84080600	NUMBL	292732
																				chr5	158304600	158304800	PAX7	500574
																				chr10	13081400	13081600	KREMEN2	287102
																				chr6	109110800	109111000	ZC2HC1C	314321
																				chr1	33914400	33914600	IRX1	306659
																				chr4	114859000	114859200	LOC500227	500227
																				chr7	11180800	11181000	DOHH	314644
																				chr7	44770400	44770600	ALX1	25401
																				chr5	169464200	169464400	HES3	64628
																				chr1	25173200	25173400	CLVS2	361459
																				chr3	61578400	61578600	HOXD13	288154
																				chr4	51843200	51843400	GPR37	117549
																				chr14	39963800	39964000	GABRG1	140674
																				chr20	7724600	7724800	SCUBE3	294297
																				chr1	144833800	144834000	MEX3B	308790
																				chr1	173682200	173682400	RIC3	687147
																				chr1	221108800	221109000	LTBP3	83838
																				chr17	43903400	43903600	BTN1A1	306956
																				chr20	5445600	5445800	B3GALT4	171079
																				chrX	156227600	156227800	OLR1768	293878
																				chr3	100770200	100770400	BDNF	24225
																				chr3	15430000	15430200	LHX6	311901
																				chr10	73336800	73337000	TBX4	303399
																				chr5	63784800	63785000	NR4A3	58853
																				chr19	31031200	31031400	FREM3	307767
																				chr1	33273200	33273400	IRX2	306657
																				chr1	52896600	52896800	TBXT	292301
																				chr1	197001200	197001400	IL21R	308977
																				chr1	260267800	260268000	BLNK	499356
																				chr1	247476600	247476800	INSL6	50546
																				chr20	9567800	9568000	GLP1R	25051
																				chr9	82419800	82420000	TUBA4A	316531
																				chr17	52568800	52569000	GLI3	140588
																				chr4	137785200	137785400	CNTN4	116658
																				chr6	99434600	99434800	HSPA2	60460
																				chr12	12025000	12025200	NPTX2	288475
																				chr14	106859000	106859200	OTX1	25646
																				chr9	66703600	66703800	FAM117B	363236
																				chr5	98468800	98469000	LURAP1L	362535
																				chr18	402000	402200	FUNDC2	361288
																				chr2	116526600	116526800	EGFEM1	310269
																				chr3	61669000	61669200	HOXD3	288152
																				chr19	26026600	26026800	DNASE2	171575
																				chr1	81946400	81946600	GRIK5	24407
																				chr1	102416000	102416200	KCNC1	25327
																				chr3	22626600	22626800	LHX2	296706
																				chr7	117354000	117354200	SMPD5	100359829
																				chr14	4372400	4372600	BARHL2	65050
																				chr13	98843800	98844000	PARP1	25591
																				chr15	46428600	46428800	GATA4	54254
																				chr15	62199800	62200000	PCDH8	64865
																				chr16	69239600	69239800	ZFP703	680717
																				chr1	100314200	100314400	SHANK1	78957
																				chr19	53045000	53045200	FOXC2	171356
																				chr10	56576600	56576800	CLDN7	65132
																				chr2	45104600	45104800	ESM1	64536
																				chr17	11684000	11684200	MSX2	25483
																				chr7	10991800	10992000	TLE2	299636
																				chr18	30905000	30905200	PCDHGA11	252897
																				chr18	8359200	8359400	CDH2	83501

## Sheet: Sheet2
From	To	Species	Gene	Name
SPI1	366126	Rattus	norvegicus	Spi-1	proto-oncogene(Spi1)
LOC500124	500124	Rattus	norvegicus	similar	to	RIKEN	cDNA	4921507P07(LOC500124)
GMFG	113940	Rattus	norvegicus	glia	maturation	factor,	gamma(Gmfg)
TRIL	362364	Rattus	norvegicus	TLR4	interactor	with	leucine-rich	repeats(Tril)
XYLT2	64134	Rattus	norvegicus	xylosyltransferase	2(Xylt2)
EMC10	292878	Rattus	norvegicus	ER	membrane	protein	complex	subunit	10(Emc10)
DEFB22	171412	Rattus	norvegicus	defensin	beta	22(Defb22)
F11R	116479	Rattus	norvegicus	F11	receptor(F11r)
RD3L	314467	Rattus	norvegicus	retinal	degeneration	3-like(Rd3l)
RPL6	117042	Rattus	norvegicus	ribosomal	protein	L6(Rpl6)
ZC3H12D	308266	Rattus	norvegicus	zinc	finger	CCCH	type	containing	12D(Zc3h12d)
ENDOU	680317	Rattus	norvegicus	endonuclease,	poly(U)-specific(Endou)
UBASH3B	315579	Rattus	norvegicus	ubiquitin	associated	and	SH3	domain	containing,	B(Ubash3b)
SCN11A	29701	Rattus	norvegicus	sodium	voltage-gated	channel	alpha	subunit	11(Scn11a)
ZC3H12A	313587	Rattus	norvegicus	zinc	finger	CCCH	type	containing	12A(Zc3h12a)
RGD1304884	307907	Rattus	norvegicus	similar	to	RIKEN	cDNA	6430548M08(RGD1304884)
RPL38	689284	Rattus	norvegicus	ribosomal	protein	L38(Rpl38)
MLYCD	85239	Rattus	norvegicus	malonyl-CoA	decarboxylase(Mlycd)
VSTM4	361112	Rattus	norvegicus	V-set	and	transmembrane	domain	containing	4(Vstm4)
JUNB	24517	Rattus	norvegicus	JunB	proto-oncogene,	AP-1	transcription	factor	subunit(Junb)
DAPK2	300799	Rattus	norvegicus	death-associated	protein	kinase	2(Dapk2)
SOX13	289026	Rattus	norvegicus	SRY	box	13(Sox13)
OXCT2A	366463	Rattus	norvegicus	3-oxoacid	CoA	transferase	2A(Oxct2a)
SCN10A	29571	Rattus	norvegicus	sodium	voltage-gated	channel	alpha	subunit	10(Scn10a)
GPR160	499588	Rattus	norvegicus	G	protein-coupled	receptor	160(Gpr160)
ORAI1	304496	Rattus	norvegicus	ORAI	calcium	release-activated	calcium	modulator	1(Orai1)
MAML3	310405	Rattus	norvegicus	mastermind-like	transcriptional	coactivator	3(Maml3)
OLR774	405233	Rattus	norvegicus	olfactory	receptor	774(Olr774)
HOXB5	497987	Rattus	norvegicus	homeo	box	B5(Hoxb5)
PRR13	363004	Rattus	norvegicus	proline	rich	13(Prr13)
HPN	29135	Rattus	norvegicus	hepsin(Hpn)
PDGFB	24628	Rattus	norvegicus	platelet	derived	growth	factor	subunit	B(Pdgfb)
FPR1	292409	Rattus	norvegicus	formyl	peptide	receptor	1(Fpr1)
OAZ1	25502	Rattus	norvegicus	ornithine	decarboxylase	antizyme	1(Oaz1)
C2	24231	Rattus	norvegicus	complement	C2(C2)
ADAMTS15	300474	Rattus	norvegicus	ADAM	metallopeptidase	with	thrombospondin	type	1	motif,	15(Adamts15)
WDR70	294783	Rattus	norvegicus	WD	repeat	domain	70(Wdr70)
FLRT1	499308	Rattus	norvegicus	fibronectin	leucine	rich	transmembrane	protein	1(Flrt1)
ZSCAN10	302962	Rattus	norvegicus	zinc	finger	and	SCAN	domain	containing	10(Zscan10)
ST3GAL4	363040	Rattus	norvegicus	ST3	beta-galactoside	alpha-2,3-sialyltransferase	4(St3gal4)
ST3GAL6	304023	Rattus	norvegicus	ST3	beta-galactoside	alpha-2,3-sialyltransferase	6(St3gal6)
ZBTB7A	117107	Rattus	norvegicus	zinc	finger	and	BTB	domain	containing	7a(Zbtb7a)
SLC19A1	29723	Rattus	norvegicus	solute	carrier	family	19	member	1(Slc19a1)
PLK3	58936	Rattus	norvegicus	polo-like	kinase	3(Plk3)
NAPSA	60575	Rattus	norvegicus	napsin	A	aspartic	peptidase(Napsa)
SNAPIN	295217	Rattus	norvegicus	SNAP-associated	protein(Snapin)
RNASE10	305840	Rattus	norvegicus	ribonuclease	A	family	member	10(Rnase10)
GRTP1	361180	Rattus	norvegicus	growth	hormone	regulated	TBC	protein	1(Grtp1)
STARD10	293150	Rattus	norvegicus	StAR-related	lipid	transfer	domain	containing	10(Stard10)
IRF2BP1	308404	Rattus	norvegicus	interferon	regulatory	factor	2	binding	protein	1(Irf2bp1)
FZD9	266608	Rattus	norvegicus	frizzled	class	receptor	9(Fzd9)
NFATC1	100361818	Rattus	norvegicus	nuclear	factor	of	activated	T-cells	1(Nfatc1)
GPN2	362614	Rattus	norvegicus	GPN-loop	GTPase	2(Gpn2)
GRIN2C	24411	Rattus	norvegicus	glutamate	ionotropic	receptor	NMDA	type	subunit	2C(Grin2c)
GRIN2B	24410	Rattus	norvegicus	glutamate	ionotropic	receptor	NMDA	type	subunit	2B(Grin2b)
SLC16A14	316578	Rattus	norvegicus	solute	carrier	family	16,	member	14(Slc16a14)
STFA3	288075	Rattus	norvegicus	stefin	A3(Stfa3)
PRRC2A	294250	Rattus	norvegicus	proline-rich	coiled-coil	2A(Prrc2a)
HNRNPL	80846	Rattus	norvegicus	heterogeneous	nuclear	ribonucleoprotein	L(Hnrnpl)
FA2H	307855	Rattus	norvegicus	fatty	acid	2-hydroxylase(Fa2h)
GJB3	29585	Rattus	norvegicus	gap	junction	protein,	beta	3(Gjb3)
HBP1	27080	Rattus	norvegicus	HMG-box	transcription	factor	1(Hbp1)
HAMP	84604	Rattus	norvegicus	hepcidin	antimicrobial	peptide(Hamp)
ARHGAP9	362893	Rattus	norvegicus	Rho	GTPase	activating	protein	9(Arhgap9)
PHF2	306814	Rattus	norvegicus	PHD	finger	protein	2(Phf2)
PIGT	296360	Rattus	norvegicus	phosphatidylinositol	glycan	anchor	biosynthesis,	class	T(Pigt)
TINAGL1	94174	Rattus	norvegicus	tubulointerstitial	nephritis	antigen-like	1(Tinagl1)
PHF1	294287	Rattus	norvegicus	PHD	finger	protein	1(Phf1)
LRRC39	691307	Rattus	norvegicus	leucine	rich	repeat	containing	39(Lrrc39)
TMEM181	502228	Rattus	norvegicus	transmembrane	protein	181(Tmem181)
CLTA	83800	Rattus	norvegicus	clathrin,	light	chain	A(Clta)
PYGM	24701	Rattus	norvegicus	phosphorylase,	glycogen,	muscle(Pygm)
PIGV	366478	Rattus	norvegicus	phosphatidylinositol	glycan	anchor	biosynthesis,	class	V(Pigv)
VSIG10	304529	Rattus	norvegicus	V-set	and	immunoglobulin	domain	containing	10(Vsig10)
MYPN	309760	Rattus	norvegicus	myopalladin(Mypn)
MRC2	498011	Rattus	norvegicus	mannose	receptor,	C	type	2(Mrc2)
LFNG	170905	Rattus	norvegicus	LFNG	O-fucosylpeptide	3-beta-N-acetylglucosaminyltransferase(Lfng)
GPR132	314480	Rattus	norvegicus	G	protein-coupled	receptor	132(Gpr132)
TIFAB	364674	Rattus	norvegicus	TIFA	inhibitor(Tifab)
TUBA1A	64158	Rattus	norvegicus	tubulin,	alpha	1A(Tuba1a)
AIFM2	361843	Rattus	norvegicus	apoptosis	inducing	factor,	mitochondria	associated	2(Aifm2)
ZFP385B	311137	Rattus	norvegicus	zinc	finger	protein	385B(Zfp385b)
ZFP385A	685474	Rattus	norvegicus	zinc	finger	protein	385A(Zfp385a)
CTLA4	63835	Rattus	norvegicus	cytotoxic	T-lymphocyte-associated	protein	4(Ctla4)
ANXA8	306283	Rattus	norvegicus	annexin	A8(Anxa8)
SH3BGRL3	298544	Rattus	norvegicus	SH3	domain	binding	glutamate-rich	protein	like	3(Sh3bgrl3)
DUSP1	114856	Rattus	norvegicus	dual	specificity	phosphatase	1(Dusp1)
ELOVL2	498728	Rattus	norvegicus	ELOVL	fatty	acid	elongase	2(Elovl2)
F5	304929	Rattus	norvegicus	coagulation	factor	V(F5)
DUSP7	300980	Rattus	norvegicus	dual	specificity	phosphatase	7(Dusp7)
F7	260320	Rattus	norvegicus	coagulation	factor	VII(F7)
SLCO4A1	171144	Rattus	norvegicus	solute	carrier	organic	anion	transporter	family,	member	4a1(Slco4a1)
OAF	315594	Rattus	norvegicus	out	at	first	homolog(Oaf)
ITPKA	81677	Rattus	norvegicus	inositol-trisphosphate	3-kinase	A(Itpka)
PELI1	305549	Rattus	norvegicus	pellino	E3	ubiquitin	protein	ligase	1(Peli1)
CDC42EP2	309175	Rattus	norvegicus	CDC42	effector	protein	2(Cdc42ep2)
AHRR	498999	Rattus	norvegicus	aryl-hydrocarbon	receptor	repressor(Ahrr)
PLEKHO1	310674	Rattus	norvegicus	pleckstrin	homology	domain	containing	O1(Plekho1)
KIFC3	307644	Rattus	norvegicus	kinesin	family	member	C3(Kifc3)
GPRC5D	500349	Rattus	norvegicus	G	protein-coupled	receptor,	class	C,	group	5,	member	D(Gprc5d)
DSCAML1	315615	Rattus	norvegicus	DS	cell	adhesion	molecule-like	1(Dscaml1)
MGLL	29254	Rattus	norvegicus	monoglyceride	lipase(Mgll)
GOT1L1	306540	Rattus	norvegicus	glutamic-oxaloacetic	transaminase	1-like	1(Got1l1)
ERVFRD-1	288602	Rattus	norvegicus	endogenous	retrovirus	group	FRD	member	1(Ervfrd-1)
CTF1	29201	Rattus	norvegicus	cardiotrophin	1(Ctf1)
PHLPP1	59265	Rattus	norvegicus	PH	domain	and	leucine	rich	repeat	protein	phosphatase	1(Phlpp1)
CEP295NL	498028	Rattus	norvegicus	CEP295	N-terminal	like(Cep295nl)
RPL11	362631	Rattus	norvegicus	ribosomal	protein	L11(Rpl11)
TMEM72	362424	Rattus	norvegicus	transmembrane	protein	72(Tmem72)
KCNA7	365241	Rattus	norvegicus	potassium	voltage-gated	channel	subfamily	A	member	7(Kcna7)
PTGS1	24693	Rattus	norvegicus	prostaglandin-endoperoxide	synthase	1(Ptgs1)
TAS2R138	500091	Rattus	norvegicus	taste	receptor,	type	2,	member	138(Tas2r138)
FGD3	361223	Rattus	norvegicus	FYVE,	RhoGEF	and	PH	domain	containing	3(Fgd3)
GAPDH-PS1	366057	Rattus	norvegicus	glyceraldehyde-3-phosphate	dehydrogenase,	pseudogene	1(Gapdh-ps1)
RPL14	65043	Rattus	norvegicus	ribosomal	protein	L14(Rpl14)
RPL13	81765	Rattus	norvegicus	ribosomal	protein	L13(Rpl13)
FLNC	362332	Rattus	norvegicus	filamin	C(Flnc)
RABAC1	83583	Rattus	norvegicus	Rab	acceptor	1(Rabac1)
LDLR	300438	Rattus	norvegicus	low	density	lipoprotein	receptor(Ldlr)
EXTL3	56819	Rattus	norvegicus	exostosin-like	glycosyltransferase	3(Extl3)
CCL17	117518	Rattus	norvegicus	C-C	motif	chemokine	ligand	17(Ccl17)
GPR157	313725	Rattus	norvegicus	G	protein-coupled	receptor	157(Gpr157)
MBD3	362834	Rattus	norvegicus	methyl-CpG	binding	domain	protein	3(Mbd3)
WDR18	314617	Rattus	norvegicus	WD	repeat	domain	18(Wdr18)
SLC8B1	498185	Rattus	norvegicus	solute	carrier	family	8	member	B1(Slc8b1)
SNX20	307742	Rattus	norvegicus	sorting	nexin	20(Snx20)
TUBB4A	29213	Rattus	norvegicus	tubulin,	beta	4A	class	IVa(Tubb4a)
DEF6	309642	Rattus	norvegicus	DEF6	guanine	nucleotide	exchange	factor(Def6)
SULF2	311642	Rattus	norvegicus	sulfatase	2(Sulf2)
PRSS40	316318	Rattus	norvegicus	protease,	serine,	40(Prss40)
LRG1	367455	Rattus	norvegicus	leucine-rich	alpha-2-glycoprotein	1(Lrg1)
ADM2	399475	Rattus	norvegicus	adrenomedullin	2(Adm2)
APEX1	79116	Rattus	norvegicus	apurinic/apyrimidinic	endodeoxyribonuclease	1(Apex1)
CCDC8	494320	Rattus	norvegicus	coiled-coil	domain	containing	8(Ccdc8)
LPCAT3	362434	Rattus	norvegicus	lysophosphatidylcholine	acyltransferase	3(Lpcat3)
NUCB2	59295	Rattus	norvegicus	nucleobindin	2(Nucb2)
KCNG2	307234	Rattus	norvegicus	potassium	voltage-gated	channel	modifier	subfamily	G	member	2(Kcng2)
RT1-CE12	309600	Rattus	norvegicus	RT1	class	I,	locus	CE12(RT1-CE12)
COL16A1	366474	Rattus	norvegicus	collagen	type	XVI	alpha	1	chain(Col16a1)
EPO	24335	Rattus	norvegicus	erythropoietin(Epo)
RGD1563222	362175	Rattus	norvegicus	similar	to	RIKEN	cDNA	A930018P22(RGD1563222)
FAM25A	684972	Rattus	norvegicus	family	with	sequence	similarity	25,	member	A(Fam25a)
GUCA1B	316218	Rattus	norvegicus	guanylate	cyclase	activator	1B(Guca1b)
FRY	304244	Rattus	norvegicus	FRY	microtubule	binding	protein(Fry)
VCSA2	289526	Rattus	norvegicus	variable	coding	sequence	A2(Vcsa2)
LAPTM4B	315047	Rattus	norvegicus	lysosomal	protein	transmembrane	4	beta(Laptm4b)
FCGRT	29558	Rattus	norvegicus	Fc	fragment	of	IgG	receptor	and	transporter(Fcgrt)
PAPOLA	314417	Rattus	norvegicus	poly	(A)	polymerase	alpha(Papola)
SLC26A10	366909	Rattus	norvegicus	solute	carrier	family	26,	member	10(Slc26a10)
IGFBP1	25685	Rattus	norvegicus	insulin-like	growth	factor	binding	protein	1(Igfbp1)
MAGI1	500261	Rattus	norvegicus	membrane	associated	guanylate	kinase,	WW	and	PDZ	domain	containing	1(Magi1)
PPP1R16B	680616	Rattus	norvegicus	protein	phosphatase	1,	regulatory	subunit	16B(Ppp1r16b)
FKBPL	406168	Rattus	norvegicus	FK506	binding	protein-like(Fkbpl)
ZFP219	305848	Rattus	norvegicus	zinc	finger	protein	219(Zfp219)
CD180	294706	Rattus	norvegicus	CD180	molecule(Cd180)
GTF3A	246299	Rattus	norvegicus	general	transcription	factor	III	A(Gtf3a)
LOC498368	498368	Rattus	norvegicus	similar	to	RIKEN	cDNA	0610040J01(LOC498368)
CNPY3	685174	Rattus	norvegicus	canopy	FGF	signaling	regulator	3(Cnpy3)
HIC1	303310	Rattus	norvegicus	hypermethylated	in	cancer	1(Hic1)
TPST2	288719	Rattus	norvegicus	tyrosylprotein	sulfotransferase	2(Tpst2)
MAPKAPK5	498183	Rattus	norvegicus	mitogen-activated	protein	kinase-activated	protein	kinase	5(Mapkapk5)
ERG	170909	Rattus	norvegicus	ERG,	ETS	transcription	factor(Erg)
NOTCH2	29492	Rattus	norvegicus	notch	2(Notch2)
DRC7	291853	Rattus	norvegicus	dynein	regulatory	complex	subunit	7(Drc7)
NOTCH1	25496	Rattus	norvegicus	notch	1(Notch1)
ASMT	246281	Rattus	norvegicus	acetylserotonin	O-methyltransferase(Asmt)
SPATA2	114210	Rattus	norvegicus	spermatogenesis	associated	2(Spata2)
ARL2	65142	Rattus	norvegicus	ADP-ribosylation	factor	like	GTPase	2(Arl2)
ZFP61	499094	Rattus	norvegicus	zinc	finger	protein	61(Zfp61)
GPR84	688730	Rattus	norvegicus	G	protein-coupled	receptor	84(Gpr84)
FBXO46	292686	Rattus	norvegicus	F-box	protein	46(Fbxo46)
KLC1	171041	Rattus	norvegicus	kinesin	light	chain	1(Klc1)
RHOBTB2	306004	Rattus	norvegicus	Rho-related	BTB	domain	containing	2(Rhobtb2)
BCL2L13	312682	Rattus	norvegicus	BCL2	like	13(Bcl2l13)
ESPNL	301606	Rattus	norvegicus	espin-like(Espnl)
MUSTN1	290553	Rattus	norvegicus	musculoskeletal,	embryonic	nuclear	protein	1(Mustn1)
CD300LB	501738	Rattus	norvegicus	CD300	molecule-like	family	member	b(Cd300lb)
BCL2L14	500348	Rattus	norvegicus	BCL2	like	14(Bcl2l14)
CPA5	408212	Rattus	norvegicus	carboxypeptidase	A5(Cpa5)
ZBTB17	313666	Rattus	norvegicus	zinc	finger	and	BTB	domain	containing	17(Zbtb17)
TOR1A	266606	Rattus	norvegicus	torsin	family	1,	member	A(Tor1a)
SLC37A1	294321	Rattus	norvegicus	solute	carrier	family	37	member	1(Slc37a1)
TMEM132E	287564	Rattus	norvegicus	transmembrane	protein	132E(Tmem132e)
ANKRD24	299639	Rattus	norvegicus	ankyrin	repeat	domain	24(Ankrd24)
ANKRD22	294093	Rattus	norvegicus	ankyrin	repeat	domain	22(Ankrd22)
NEK6	360161	Rattus	norvegicus	NIMA-related	kinase	6(Nek6)
ANKRD23	316330	Rattus	norvegicus	ankyrin	repeat	domain	23(Ankrd23)
TVP23A	360467	Rattus	norvegicus	trans-golgi	network	vesicle	protein	23A(Tvp23a)
DHCR24	298298	Rattus	norvegicus	24-dehydrocholesterol	reductase(Dhcr24)
HPS5	308598	Rattus	norvegicus	Hermansky-Pudlak	syndrome	5(Hps5)
PLET1	363060	Rattus	norvegicus	placenta	expressed	transcript	1(Plet1)
GGCT	362368	Rattus	norvegicus	gamma-glutamyl	cyclotransferase(Ggct)
TMIE	501061	Rattus	norvegicus	transmembrane	inner	ear(Tmie)
ZFP64	311661	Rattus	norvegicus	zinc	finger	protein	64(Zfp64)
PLEKHM1	303584	Rattus	norvegicus	pleckstrin	homology	and	RUN	domain	containing	M1(Plekhm1)
MDM2	314856	Rattus	norvegicus	MDM2	proto-oncogene(Mdm2)
GPR107	311857	Rattus	norvegicus	G	protein-coupled	receptor	107(Gpr107)
LCN5	29552	Rattus	norvegicus	lipocalin	5(Lcn5)
SPRN	541462	Rattus	norvegicus	shadow	of	prion	protein	homolog	(zebrafish)(Sprn)
KCNK5	364241	Rattus	norvegicus	potassium	two	pore	domain	channel	subfamily	K	member	5(Kcnk5)
TRIM71	301042	Rattus	norvegicus	tripartite	motif	containing	71(Trim71)
ZFP523	361809	Rattus	norvegicus	zinc	finger	protein	523(Zfp523)
PIWIL1	363912	Rattus	norvegicus	piwi-like	RNA-mediated	gene	silencing	1(Piwil1)
PIWIL4	689972	Rattus	norvegicus	piwi-like	RNA-mediated	gene	silencing	4(Piwil4)
PLEKHF1	308543	Rattus	norvegicus	pleckstrin	homology	and	FYVE	domain	containing	1(Plekhf1)
ALAS1	65155	Rattus	norvegicus	5'-aminolevulinate	synthase	1(Alas1)
ITGB3	29302	Rattus	norvegicus	integrin	subunit	beta	3(Itgb3)
FHL1	25177	Rattus	norvegicus	four	and	a	half	LIM	domains	1(Fhl1)
WDR4	690032	Rattus	norvegicus	WD	repeat	domain	4(Wdr4)
TREM3	367215	Rattus	norvegicus	triggering	receptor	expressed	on	myeloid	cells	3(Trem3)
TCIRG1	293650	Rattus	norvegicus	T-cell	immune	regulator	1,	ATPase	H+	transporting	V0	subunit	A3(Tcirg1)
ITGAL	308995	Rattus	norvegicus	integrin	subunit	alpha	L(Itgal)
MDK	81517	Rattus	norvegicus	midkine(Mdk)
RNPEP	81761	Rattus	norvegicus	arginyl	aminopeptidase(Rnpep)
PMEPA1	311676	Rattus	norvegicus	prostate	transmembrane	protein,	androgen	induced	1(Pmepa1)
SPDL1	303037	Rattus	norvegicus	spindle	apparatus	coiled-coil	protein	1(Spdl1)
PGPEP1	290648	Rattus	norvegicus	pyroglutamyl-peptidase	I(Pgpep1)
LOC361016	361016	Rattus	norvegicus	similar	to	RIKEN	cDNA	4933406L09(LOC361016)
SLC36A3	303148	Rattus	norvegicus	solute	carrier	family	36,	member	3(Slc36a3)
LOC502176	502176	Rattus	norvegicus	hypothetical	protein	LOC502176(LOC502176)
NGB	85382	Rattus	norvegicus	neuroglobin(Ngb)
VPS37D	687208	Rattus	norvegicus	VPS37D,	ESCRT-I	subunit(Vps37d)
RAD23A	361381	Rattus	norvegicus	RAD23	homolog	A,	nucleotide	excision	repair	protein(Rad23a)
VPS37B	288659	Rattus	norvegicus	VPS37B,	ESCRT-I	subunit(Vps37b)
ARFGAP1	246310	Rattus	norvegicus	ADP-ribosylation	factor	GTPase	activating	protein	1(Arfgap1)
LCA5L	498065	Rattus	norvegicus	LCA5L,	lebercilin	like(Lca5l)
ITGAD	64350	Rattus	norvegicus	integrin	subunit	alpha	D(Itgad)
TMBIM6	24822	Rattus	norvegicus	transmembrane	BAX	inhibitor	motif	containing	6(Tmbim6)
ITGA6	114517	Rattus	norvegicus	integrin	subunit	alpha	6(Itga6)
SLC25A11	64201	Rattus	norvegicus	solute	carrier	family	25	member	11(Slc25a11)
ST6GALNAC6	407765	Rattus	norvegicus	ST6	N-acetylgalactosaminide	alpha-2,6-sialyltransferase	6(St6galnac6)
CX3CR1	171056	Rattus	norvegicus	C-X3-C	motif	chemokine	receptor	1(Cx3cr1)
RBPJL	362268	Rattus	norvegicus	recombination	signal	binding	protein	for	immunoglobulin	kappa	J	region-like(Rbpjl)
CEBPA	24252	Rattus	norvegicus	CCAAT/enhancer	binding	protein	alpha(Cebpa)
RAB1A	81754	Rattus	norvegicus	RAB1A,	member	RAS	oncogene	family(Rab1a)
CEBPB	24253	Rattus	norvegicus	CCAAT/enhancer	binding	protein	beta(Cebpb)
SMARCD2	83833	Rattus	norvegicus	SWI/SNF	related,	matrix	associated,	actin	dependent	regulator	of	chromatin,	subfamily	d,	member	2(Smarcd2)
PLEKHH3	360634	Rattus	norvegicus	pleckstrin	homology,	MyTH4	and	FERM	domain	containing	H3(Plekhh3)
SMARCD3	296732	Rattus	norvegicus	SWI/SNF	related,	matrix	associated,	actin	dependent	regulator	of	chromatin,	subfamily	d,	member	3(Smarcd3)
LOC689316	689316	Rattus	norvegicus	hypothetical	protein	LOC689316(LOC689316)
CEBPE	25410	Rattus	norvegicus	CCAAT/enhancer	binding	protein	epsilon(Cebpe)
FGL2	84586	Rattus	norvegicus	fibrinogen-like	2(Fgl2)
SEMA3B	363142	Rattus	norvegicus	semaphorin	3B(Sema3b)
CEBPG	25301	Rattus	norvegicus	CCAAT/enhancer	binding	protein	gamma(Cebpg)
FOXK1	304298	Rattus	norvegicus	forkhead	box	K1(Foxk1)
HSD17B13	305150	Rattus	norvegicus	hydroxysteroid	(17-beta)	dehydrogenase	13(Hsd17b13)
TULP1	309900	Rattus	norvegicus	tubby	like	protein	1(Tulp1)
ARL13B	304037	Rattus	norvegicus	ADP-ribosylation	factor	like	GTPase	13B(Arl13b)
MIR3558	100526575	Rattus	norvegicus	microRNA	3558(Mir3558)
NOCT	310395	Rattus	norvegicus	nocturnin(Noct)
RAB24	361208	Rattus	norvegicus	RAB24,	member	RAS	oncogene	family(Rab24)
GADD45GIP1	288916	Rattus	norvegicus	GADD45G	interacting	protein	1(Gadd45gip1)
RNF20	313216	Rattus	norvegicus	ring	finger	protein	20(Rnf20)
PTPN1	24697	Rattus	norvegicus	protein	tyrosine	phosphatase,	non-receptor	type	1(Ptpn1)
PTPN18	301333	Rattus	norvegicus	protein	tyrosine	phosphatase,	non-receptor	type	18(Ptpn18)
KCNIP1	65023	Rattus	norvegicus	potassium	voltage-gated	channel	interacting	protein	1(Kcnip1)
SEMA4D	306790	Rattus	norvegicus	semaphorin	4D(Sema4d)
NCKAP5L	315297	Rattus	norvegicus	NCK-associated	protein	5-like(Nckap5l)
LYSMD1	499671	Rattus	norvegicus	LysM	domain	containing	1(Lysmd1)
BAIAP2	117542	Rattus	norvegicus	BAI1-associated	protein	2(Baiap2)
KLF2	306330	Rattus	norvegicus	Kruppel-like	factor	2(Klf2)
TPCN1	246215	Rattus	norvegicus	two	pore	segment	channel	1(Tpcn1)
NELL1	81733	Rattus	norvegicus	neural	EGFL	like	1(Nell1)
PFKL	25741	Rattus	norvegicus	phosphofructokinase,	liver	type(Pfkl)
P2RX1	25505	Rattus	norvegicus	purinergic	receptor	P2X	1(P2rx1)
POLR3H	300088	Rattus	norvegicus	RNA	polymerase	III	subunit	H(Polr3h)
CLCA4L	499721	Rattus	norvegicus	chloride	channel	calcium	activated	4-like(Clca4l)
FCGR2B	289211	Rattus	norvegicus	Fc	fragment	of	IgG,	low	affinity	IIb,	receptor(Fcgr2b)
KCNK1	59324	Rattus	norvegicus	potassium	two	pore	domain	channel	subfamily	K	member	1(Kcnk1)
PFKP	60416	Rattus	norvegicus	phosphofructokinase,	platelet(Pfkp)
IFITM3	361673	Rattus	norvegicus	interferon	induced	transmembrane	protein	3(Ifitm3)
SLC23A1	50621	Rattus	norvegicus	solute	carrier	family	23	member	1(Slc23a1)
INS2	24506	Rattus	norvegicus	insulin	2(Ins2)
ICAM2	360647	Rattus	norvegicus	intercellular	adhesion	molecule	2(Icam2)
CISD1	294362	Rattus	norvegicus	CDGSH	iron	sulfur	domain	1(Cisd1)
PREP	83471	Rattus	norvegicus	prolyl	endopeptidase(Prep)
ZDHHC7	170906	Rattus	norvegicus	zinc	finger,	DHHC-type	containing	7(Zdhhc7)
MTFR1L	298549	Rattus	norvegicus	mitochondrial	fission	regulator	1-like(Mtfr1l)
PKD2L2	291683	Rattus	norvegicus	polycystin	2	like	2,	transient	receptor	potential	cation	channel(Pkd2l2)
AQP3	65133	Rattus	norvegicus	aquaporin	3(Aqp3)
NUDT3	294292	Rattus	norvegicus	nudix	hydrolase	3(Nudt3)
RPS15	29285	Rattus	norvegicus	ribosomal	protein	S15(Rps15)
PPP2R1B	315648	Rattus	norvegicus	protein	phosphatase	2	scaffold	subunit	A	beta(Ppp2r1b)
RPL18A	290641	Rattus	norvegicus	ribosomal	protein	L18A(Rpl18a)
RASSF4	362423	Rattus	norvegicus	Ras	association	domain	family	member	4(Rassf4)
CCDC97	292724	Rattus	norvegicus	coiled-coil	domain	containing	97(Ccdc97)
PIEZO1	361430	Rattus	norvegicus	piezo-type	mechanosensitive	ion	channel	component	1(Piezo1)
SOX9	140586	Rattus	norvegicus	SRY	box	9(Sox9)
EPHB2	313633	Rattus	norvegicus	Eph	receptor	B2(Ephb2)
SYNPO	60324	Rattus	norvegicus	synaptopodin(Synpo)
PTGDS	25526	Rattus	norvegicus	prostaglandin	D2	synthase(Ptgds)
ARRDC5	680452	Rattus	norvegicus	arrestin	domain	containing	5(Arrdc5)
SRRM4	498189	Rattus	norvegicus	serine/arginine	repetitive	matrix	4(Srrm4)
PAQR7	313615	Rattus	norvegicus	progestin	and	adipoQ	receptor	family	member	7(Paqr7)
ENTPD4	361063	Rattus	norvegicus	ectonucleoside	triphosphate	diphosphohydrolase	4(Entpd4)
METTL3	361035	Rattus	norvegicus	methyltransferase-like	3(Mettl3)
SLC6A13	171163	Rattus	norvegicus	solute	carrier	family	6	member	13(Slc6a13)
MTUS1	306487	Rattus	norvegicus	microtubule	associated	tumor	suppressor	1(Mtus1)
SLC6A12	50676	Rattus	norvegicus	solute	carrier	family	6	member	12(Slc6a12)
KCNK16	688996	Rattus	norvegicus	potassium	two	pore	domain	channel	subfamily	K	member	16(Kcnk16)
HNF1A	24817	Rattus	norvegicus	HNF1	homeobox	A(Hnf1a)
RUNX3	156726	Rattus	norvegicus	runt-related	transcription	factor	3(Runx3)
RUNX2	367218	Rattus	norvegicus	runt-related	transcription	factor	2(Runx2)
CHIT1	289032	Rattus	norvegicus	chitinase	1(Chit1)
PLPP7	296635	Rattus	norvegicus	phospholipid	phosphatase	7(Plpp7)
CRISPLD2	171547	Rattus	norvegicus	cysteine-rich	secretory	protein	LCCL	domain	containing	2(Crispld2)
HSBP1L1	100192205	Rattus	norvegicus	heat	shock	factor	binding	protein	1-like	1(Hsbp1l1)
SLC22A3	29504	Rattus	norvegicus	solute	carrier	family	22	member	3(Slc22a3)
SH2D2A	310688	Rattus	norvegicus	SH2	domain	containing	2A(Sh2d2a)
ZBTB1	314246	Rattus	norvegicus	zinc	finger	and	BTB	domain	containing	1(Zbtb1)
MGST2	295037	Rattus	norvegicus	microsomal	glutathione	S-transferase	2(Mgst2)
PPL	302934	Rattus	norvegicus	periplakin(Ppl)
PIK3R5	497931	Rattus	norvegicus	phosphoinositide-3-kinase,	regulatory	subunit	5(Pik3r5)
GNG10	114119	Rattus	norvegicus	G	protein	subunit	gamma	10(Gng10)
SYNGR2	89815	Rattus	norvegicus	synaptogyrin	2(Syngr2)
MIER2	362841	Rattus	norvegicus	mesoderm	induction	early	response	1,	family	member	2(Mier2)
NEU1	24591	Rattus	norvegicus	neuraminidase	1(Neu1)
SLAMF8	289237	Rattus	norvegicus	SLAM	family	member	8(Slamf8)
RALGDS	29622	Rattus	norvegicus	ral	guanine	nucleotide	dissociation	stimulator(Ralgds)
EGR2	114090	Rattus	norvegicus	early	growth	response	2(Egr2)
TMEM184B	362959	Rattus	norvegicus	transmembrane	protein	184B(Tmem184b)
GADD45B	299626	Rattus	norvegicus	growth	arrest	and	DNA-damage-inducible,	beta(Gadd45b)
SRPK1	361811	Rattus	norvegicus	SRSF	protein	kinase	1(Srpk1)
HAL	29301	Rattus	norvegicus	histidine	ammonia	lyase(Hal)
NCEH1	294930	Rattus	norvegicus	neutral	cholesterol	ester	hydrolase	1(Nceh1)
PTK7	301242	Rattus	norvegicus	protein	tyrosine	kinase	7(Ptk7)
SPRTN	292101	Rattus	norvegicus	SprT-like	N-terminal	domain(Sprtn)
DDR1	25678	Rattus	norvegicus	discoidin	domain	receptor	tyrosine	kinase	1(Ddr1)
MRS2	79032	Rattus	norvegicus	MRS2	magnesium	transporter(Mrs2)
FEN1	84490	Rattus	norvegicus	flap	structure-specific	endonuclease	1(Fen1)
DOC2A	65031	Rattus	norvegicus	double	C2	domain	alpha(Doc2a)
CITED2	114490	Rattus	norvegicus	Cbp/p300-interacting	transactivator,	with	Glu/Asp-rich	carboxy-terminal	domain,	2(Cited2)
MOGAT1	363261	Rattus	norvegicus	monoacylglycerol	O-acyltransferase	1(Mogat1)
CX3CL1	89808	Rattus	norvegicus	C-X3-C	motif	chemokine	ligand	1(Cx3cl1)
MLN	100126231	Rattus	norvegicus	motilin(Mln)
MYL6L	362816	Rattus	norvegicus	myosin,	light	polypeptide	6,	alkali,	smooth	muscle	and	non-muscle-like(Myl6l)
GABRR2	29695	Rattus	norvegicus	gamma-aminobutyric	acid	type	A	receptor	rho	2	subunit(Gabrr2)
SH3PXD2A	309460	Rattus	norvegicus	SH3	and	PX	domains	2A(Sh3pxd2a)
FFAR2	292794	Rattus	norvegicus	free	fatty	acid	receptor	2(Ffar2)
CBR1	29224	Rattus	norvegicus	carbonyl	reductase	1(Cbr1)
MANBA	310864	Rattus	norvegicus	mannosidase	beta(Manba)
BHMT2	365972	Rattus	norvegicus	betaine-homocysteine	S-methyltransferase	2(Bhmt2)
MINK1	303259	Rattus	norvegicus	misshapen-like	kinase	1(Mink1)
MIR21	100314000	Rattus	norvegicus	microRNA	21(Mir21)
ANO6	315272	Rattus	norvegicus	anoctamin	6(Ano6)
IL17RD	498576	Rattus	norvegicus	interleukin	17	receptor	D(Il17rd)
APRT	292072	Rattus	norvegicus	adenine	phosphoribosyl	transferase(Aprt)
RGD1562726	498060	Rattus	norvegicus	similar	to	Putative	protein	C21orf62	homolog(RGD1562726)
MN1	498194	Rattus	norvegicus	meningioma	1(Mn1)
MC3R	29310	Rattus	norvegicus	melanocortin	3	receptor(Mc3r)
TOX2	311615	Rattus	norvegicus	TOX	high	mobility	group	box	family	member	2(Tox2)
CTU1	292847	Rattus	norvegicus	cytosolic	thiouridylase	subunit	1(Ctu1)
CYP2B21	292728	Rattus	norvegicus	cytochrome	P450,	family	2,	subfamily	b,	polypeptide	21(Cyp2b21)
KIT	64030	Rattus	norvegicus	KIT	proto-oncogene	receptor	tyrosine	kinase(Kit)
CD48	245962	Rattus	norvegicus	Cd48	molecule(Cd48)
TLR5	289337	Rattus	norvegicus	toll-like	receptor	5(Tlr5)
ATP6V0C	170667	Rattus	norvegicus	ATPase	H+	transporting	V0	subunit	C(Atp6v0c)
VWA7	309611	Rattus	norvegicus	von	Willebrand	factor	A	domain	containing	7(Vwa7)
DDR2	685781	Rattus	norvegicus	discoidin	domain	receptor	tyrosine	kinase	2(Ddr2)
POPDC2	360718	Rattus	norvegicus	popeye	domain	containing	2(Popdc2)
GUCY2D	113911	Rattus	norvegicus	guanylate	cyclase	2d(Gucy2d)
ZFP703	680717	Rattus	norvegicus	zinc	finger	protein	703(Zfp703)
IBA57	363611	Rattus	norvegicus	IBA57	homolog,	iron-sulfur	cluster	assembly(Iba57)
TRAK1	316085	Rattus	norvegicus	trafficking	kinesin	protein	1(Trak1)
FAAP20	362678	Rattus	norvegicus	Fanconi	anemia	core	complex	associated	protein	20(Faap20)
LYZL4	363168	Rattus	norvegicus	lysozyme-like	4(Lyzl4)
AKAP2	298024	Rattus	norvegicus	A-kinase	anchoring	protein	2(Akap2)
ZDHHC25	300323	Rattus	norvegicus	zinc	finger,	DHHC-type	containing	25(Zdhhc25)
ARNTL2	362464	Rattus	norvegicus	aryl	hydrocarbon	receptor	nuclear	translocator-like	2(Arntl2)
BEGAIN	79146	Rattus	norvegicus	brain-enriched	guanylate	kinase-associated(Begain)
CYP17A1	25146	Rattus	norvegicus	cytochrome	P450,	family	17,	subfamily	a,	polypeptide	1(Cyp17a1)
LIMA1	300228	Rattus	norvegicus	LIM	domain	and	actin	binding	1(Lima1)
RXRA	25271	Rattus	norvegicus	retinoid	X	receptor	alpha(Rxra)
CXCR1	54258	Rattus	norvegicus	C-X-C	motif	chemokine	receptor	1(Cxcr1)
LMNA	60374	Rattus	norvegicus	lamin	A/C(Lmna)
LY6G6D	415062	Rattus	norvegicus	lymphocyte	antigen	6	complex,	locus	G6D(Ly6g6d)
MPZL1	360871	Rattus	norvegicus	myelin	protein	zero-like	1(Mpzl1)
PURG	361162	Rattus	norvegicus	purine-rich	element	binding	protein	G(Purg)
GDF11	29454	Rattus	norvegicus	growth	differentiation	factor	11(Gdf11)
OLR1462	405993	Rattus	norvegicus	olfactory	receptor	1462(Olr1462)
MTX1	295241	Rattus	norvegicus	Metaxin	1(Mtx1)
LHFPL2	294643	Rattus	norvegicus	lipoma	HMGIC	fusion	partner-like	2(Lhfpl2)
LOC100125366	100125366	Rattus	norvegicus	40S	ribosomal	protein	S2(LOC100125366)
COLQ	29755	Rattus	norvegicus	collagen	like	tail	subunit	of	asymmetric	acetylcholinesterase(Colq)
ALDH4A1	641316	Rattus	norvegicus	aldehyde	dehydrogenase	4	family,	member	A1(Aldh4a1)
TFAP4	360482	Rattus	norvegicus	transcription	factor	AP-4(Tfap4)
AXL	308444	Rattus	norvegicus	Axl	receptor	tyrosine	kinase(Axl)
STAC2	363674	Rattus	norvegicus	SH3	and	cysteine	rich	domain	2(Stac2)
KLHL8	289457	Rattus	norvegicus	kelch-like	family	member	8(Klhl8)
KBTBD7	100909827	Rattus	norvegicus	kelch	repeat	and	BTB	domain	containing	7(Kbtbd7)
MEGF8	114029	Rattus	norvegicus	multiple	EGF-like-domains	8(Megf8)
NEUROG1	29410	Rattus	norvegicus	neurogenin	1(Neurog1)
PNPLA1	361812	Rattus	norvegicus	patatin-like	phospholipase	domain	containing	1(Pnpla1)
CDK5R1	116671	Rattus	norvegicus	cyclin-dependent	kinase	5	regulatory	subunit	1(Cdk5r1)
GDA	83585	Rattus	norvegicus	guanine	deaminase(Gda)
MIR26A	100314290	Rattus	norvegicus	microRNA	26a(Mir26a)
PRDM2	313678	Rattus	norvegicus	PR/SET	domain	2(Prdm2)
CYP46A1	362782	Rattus	norvegicus	cytochrome	P450,	family	46,	subfamily	a,	polypeptide	1(Cyp46a1)
MPO	303413	Rattus	norvegicus	myeloperoxidase(Mpo)
COTL1	361422	Rattus	norvegicus	coactosin-like	F-actin	binding	protein	1(Cotl1)
KRT71	683613	Rattus	norvegicus	keratin	71(Krt71)
RALBP1	84014	Rattus	norvegicus	ralA	binding	protein	1(Ralbp1)
OLR127	405911	Rattus	norvegicus	olfactory	receptor	127(Olr127)
KDM2B	304495	Rattus	norvegicus	lysine	demethylase	2B(Kdm2b)
MSX2	25483	Rattus	norvegicus	msh	homeobox	2(Msx2)
TMOD4	295261	Rattus	norvegicus	tropomodulin	4(Tmod4)
HGF	24446	Rattus	norvegicus	hepatocyte	growth	factor(Hgf)
PRM3	442921	Rattus	norvegicus	protamine	3(Prm3)
DHDDS	298541	Rattus	norvegicus	dehydrodolichyl	diphosphate	synthase	subunit(Dhdds)
GPANK1	415064	Rattus	norvegicus	G	patch	domain	and	ankyrin	repeats	1(Gpank1)
ADAM15	57025	Rattus	norvegicus	ADAM	metallopeptidase	domain	15(Adam15)
DKC1	170944	Rattus	norvegicus	dyskerin	pseudouridine	synthase	1(Dkc1)
GPD2	25062	Rattus	norvegicus	glycerol-3-phosphate	dehydrogenase	2(Gpd2)
DOK7	305448	Rattus	norvegicus	docking	protein	7(Dok7)
EMID1	685462	Rattus	norvegicus	EMI	domain	containing	1(Emid1)
GNAZ	25740	Rattus	norvegicus	G	protein	subunit	alpha	z(Gnaz)
AKNA	362530	Rattus	norvegicus	AT-hook	transcription	factor(Akna)
NNMT	300691	Rattus	norvegicus	nicotinamide	N-methyltransferase(Nnmt)
NPR1	24603	Rattus	norvegicus	natriuretic	peptide	receptor	1(Npr1)
UBA6	305268	Rattus	norvegicus	ubiquitin-like	modifier	activating	enzyme	6(Uba6)
CABP1	171051	Rattus	norvegicus	calcium	binding	protein	1(Cabp1)
LPP	288010	Rattus	norvegicus	LIM	domain	containing	preferred	translocation	partner	in	lipoma(Lpp)
MIRLET7A1	100314213	Rattus	norvegicus	microRNA	let-7a-1(Mirlet7a1)
CALHM2	294019	Rattus	norvegicus	calcium	homeostasis	modulator	2(Calhm2)
CDH20	363948	Rattus	norvegicus	cadherin	20(Cdh20)
IRAK2	362418	Rattus	norvegicus	interleukin-1	receptor-associated	kinase	2(Irak2)
CASKIN1	140722	Rattus	norvegicus	CASK	interacting	protein	1(Caskin1)
CHAD	29195	Rattus	norvegicus	chondroadherin(Chad)
ACBD7	361277	Rattus	norvegicus	acyl-CoA	binding	domain	containing	7(Acbd7)
SMAD1	25671	Rattus	norvegicus	SMAD	family	member	1(Smad1)
SYT2	24805	Rattus	norvegicus	synaptotagmin	2(Syt2)
ARHGAP28	301709	Rattus	norvegicus	Rho	GTPase	activating	protein	28(Arhgap28)
MT1	24567	Rattus	norvegicus	metallothionein	1(Mt1)
PBP2	246145	Rattus	norvegicus	phosphatidylethanolamine	binding	protein	2(Pbp2)
DAO	114027	Rattus	norvegicus	D-amino-acid	oxidase(Dao)
FAM151A	313430	Rattus	norvegicus	family	with	sequence	similarity	151,	member	A(Fam151a)
COL5A3	60379	Rattus	norvegicus	collagen	type	V	alpha	3	chain(Col5a3)
PYROXD2	309381	Rattus	norvegicus	pyridine	nucleotide-disulphide	oxidoreductase	domain	2(Pyroxd2)
DEGS2	314438	Rattus	norvegicus	delta(4)-desaturase,	sphingolipid	2(Degs2)
MIR6333	102465167	Rattus	norvegicus	microRNA	6333(Mir6333)
MUC20	303886	Rattus	norvegicus	mucin	20,	cell	surface	associated(Muc20)
MIR3065	100526580	Rattus	norvegicus	microRNA	3065(Mir3065)
PHF19	296653	Rattus	norvegicus	PHD	finger	protein	19(Phf19)
HSPB9	363681	Rattus	norvegicus	heat	shock	protein	family	B	(small)	member	9(Hspb9)
SCYL3	360866	Rattus	norvegicus	SCY1	like	pseudokinase	3(Scyl3)
WNT2B	116466	Rattus	norvegicus	wingless-type	MMTV	integration	site	family,	member	2B(Wnt2b)
SLC2A1	24778	Rattus	norvegicus	solute	carrier	family	2	member	1(Slc2a1)
CHD5	691589	Rattus	norvegicus	chromodomain	helicase	DNA	binding	protein	5(Chd5)
OLR94	405908	Rattus	norvegicus	olfactory	receptor	94(Olr94)
MIR349	100313983	Rattus	norvegicus	microRNA	349(Mir349)
HMGB4	685271	Rattus	norvegicus	high-mobility	group	box	4(Hmgb4)
LTB4R	59264	Rattus	norvegicus	leukotriene	B4	receptor(Ltb4r)
HK1	25058	Rattus	norvegicus	hexokinase	1(Hk1)
LASP1	29278	Rattus	norvegicus	LIM	and	SH3	protein	1(Lasp1)
ABHD16A	361796	Rattus	norvegicus	abhydrolase	domain	containing	16A(Abhd16a)
TMEM104	303670	Rattus	norvegicus	transmembrane	protein	104(Tmem104)
ZC3H7B	315158	Rattus	norvegicus	zinc	finger	CCCH-type	containing	7B(Zc3h7b)
GPER1	171104	Rattus	norvegicus	G	protein-coupled	estrogen	receptor	1(Gper1)
PDE4A	25638	Rattus	norvegicus	phosphodiesterase	4A(Pde4a)
POLK	171525	Rattus	norvegicus	DNA	polymerase	kappa(Polk)
LRRFIP1	367314	Rattus	norvegicus	LRR	binding	FLII	interacting	protein	1(Lrrfip1)
ABCC3	140668	Rattus	norvegicus	ATP	binding	cassette	subfamily	C	member	3(Abcc3)
USP46	289584	Rattus	norvegicus	ubiquitin	specific	peptidase	46(Usp46)
EGFL7	245963	Rattus	norvegicus	EGF-like-domain,	multiple	7(Egfl7)
SVOP	171442	Rattus	norvegicus	SV2	related	protein(Svop)
MIR23A	100314228	Rattus	norvegicus	microRNA	23a(Mir23a)
AQP12A	367316	Rattus	norvegicus	aquaporin	12A(Aqp12a)
AKTIP	291906	Rattus	norvegicus	AKT	interacting	protein(Aktip)
RT1-DOA	24984	Rattus	norvegicus	RT1	class	II,	locus	DOa(RT1-DOa)
PPP2R5A	312754	Rattus	norvegicus	protein	phosphatase	2,	regulatory	subunit	B',	alpha(Ppp2r5a)
ABCC9	25560	Rattus	norvegicus	ATP	binding	cassette	subfamily	C	member	9(Abcc9)
UTF1	681901	Rattus	norvegicus	undifferentiated	embryonic	cell	transcription	factor	1(Utf1)
CREB3	298400	Rattus	norvegicus	cAMP	responsive	element	binding	protein	3(Creb3)
GFOD1	306842	Rattus	norvegicus	glucose-fructose	oxidoreductase	domain	containing	1(Gfod1)
ACOX2	252898	Rattus	norvegicus	acyl-CoA	oxidase	2(Acox2)
CDHR1	93662	Rattus	norvegicus	cadherin-related	family	member	1(Cdhr1)
GORASP1	56082	Rattus	norvegicus	golgi	reassembly	stacking	protein	1(Gorasp1)
ATG4C	313391	Rattus	norvegicus	autophagy	related	4C,	cysteine	peptidase(Atg4c)
CHI3L1	89824	Rattus	norvegicus	chitinase	3	like	1(Chi3l1)
SHANK2	171093	Rattus	norvegicus	SH3	and	multiple	ankyrin	repeat	domains	2(Shank2)
PLEC	64204	Rattus	norvegicus	plectin(Plec)
B4GALT5	362275	Rattus	norvegicus	beta-1,4-galactosyltransferase	5(B4galt5)
RALB	116546	Rattus	norvegicus	RAS	like	proto-oncogene	B(Ralb)
NAA20	362228	Rattus	norvegicus	N(alpha)-acetyltransferase	20,	NatB	catalytic	subunit(Naa20)
RGS16	360857	Rattus	norvegicus	regulator	of	G-protein	signaling	16(Rgs16)
IER5L	499772	Rattus	norvegicus	immediate	early	response	5-like(Ier5l)
THBS2	292406	Rattus	norvegicus	thrombospondin	2(Thbs2)
UACA	315732	Rattus	norvegicus	uveal	autoantigen	with	coiled-coil	domains	and	ankyrin	repeats(Uaca)
CYGB	170520	Rattus	norvegicus	cytoglobin(Cygb)
MAPK9	50658	Rattus	norvegicus	mitogen-activated	protein	kinase	9(Mapk9)
ALDH1B1	298079	Rattus	norvegicus	aldehyde	dehydrogenase	1	family,	member	B1(Aldh1b1)
PALMD	310811	Rattus	norvegicus	palmdelphin(Palmd)
GNG7	58979	Rattus	norvegicus	G	protein	subunit	gamma	7(Gng7)
GNA12	81663	Rattus	norvegicus	G	protein	subunit	alpha	12(Gna12)
EPS8L2	361674	Rattus	norvegicus	EPS8-like	2(Eps8l2)
RGD1565033	498014	Rattus	norvegicus	similar	to	hypothetical	protein	LOC284018	isoform	b(RGD1565033)
HES1	29577	Rattus	norvegicus	hes	family	bHLH	transcription	factor	1(Hes1)
MTA2	361724	Rattus	norvegicus	metastasis	associated	1	family,	member	2(Mta2)
S1PR4	314649	Rattus	norvegicus	sphingosine-1-phosphate	receptor	4(S1pr4)
PLA2G2F	690388	Rattus	norvegicus	phospholipase	A2,	group	IIF(Pla2g2f)
GALNT6	100361647	Rattus	norvegicus	polypeptide	N-acetylgalactosaminyltransferase	6(Galnt6)
PLA2G2D	298579	Rattus	norvegicus	phospholipase	A2,	group	IID(Pla2g2d)
GALNT4	500826	Rattus	norvegicus	polypeptide	N-acetylgalactosaminyltransferase	4(Galnt4)
RRM2	362720	Rattus	norvegicus	ribonucleotide	reductase	regulatory	subunit	M2(Rrm2)
PLA2G2E	298581	Rattus	norvegicus	phospholipase	A2,	group	IIE(Pla2g2e)
BNIP3	84480	Rattus	norvegicus	BCL2/adenovirus	E1B	interacting	protein	3(Bnip3)
SGPP2	301543	Rattus	norvegicus	sphingosine-1-phosphate	phosphatase	2(Sgpp2)
RSPH1	361818	Rattus	norvegicus	radial	spoke	head	1	homolog(Rsph1)
FAM167A	498533	Rattus	norvegicus	family	with	sequence	similarity	167,	member	A(Fam167a)
CAPN12	308476	Rattus	norvegicus	calpain	12(Capn12)
SPATA32	287747	Rattus	norvegicus	spermatogenesis	associated	32(Spata32)
XPNPEP1	170751	Rattus	norvegicus	X-prolyl	aminopeptidase	1(Xpnpep1)
MIR141	100314215	Rattus	norvegicus	microRNA	141(Mir141)
TBKBP1	266764	Rattus	norvegicus	TBK1	binding	protein	1(Tbkbp1)
LTBR	297604	Rattus	norvegicus	lymphotoxin	beta	receptor(Ltbr)

## Sheet: Sheet3
From	To	Species	Gene	Name
MAP10	307948	Rattus	norvegicus	microtubule-associated	protein	10(Map10)
MYT1L	116668	Rattus	norvegicus	myelin	transcription	factor	1-like(Myt1l)
TRIL	362364	Rattus	norvegicus	TLR4	interactor	with	leucine-rich	repeats(Tril)
RAX	114213	Rattus	norvegicus	retina	and	anterior	neural	fold	homeobox(Rax)
XYLT2	64134	Rattus	norvegicus	xylosyltransferase	2(Xylt2)
FZD10	363913	Rattus	norvegicus	frizzled	class	receptor	10(Fzd10)
LURAP1L	362535	Rattus	norvegicus	leucine	rich	adaptor	protein	1-like(Lurap1l)
SOX17	312936	Rattus	norvegicus	SRY	box	17(Sox17)
EVA1B	362597	Rattus	norvegicus	eva-1	homolog	B(Eva1b)
RPL22	81768	Rattus	norvegicus	ribosomal	protein	L22(Rpl22)
SOX14	300954	Rattus	norvegicus	SRY	box	14(Sox14)
SOX11	84046	Rattus	norvegicus	SRY	box	11(Sox11)
UNC5C	362049	Rattus	norvegicus	unc-5	netrin	receptor	C(Unc5c)
UNC5D	306534	Rattus	norvegicus	unc-5	netrin	receptor	D(Unc5d)
SOX10	29361	Rattus	norvegicus	SRY	box	10(Sox10)
UPB1	116593	Rattus	norvegicus	beta-ureidopropionase	1(Upb1)
GABRG1	140674	Rattus	norvegicus	gamma-aminobutyric	acid	type	A	receptor	gamma	1	subunit(Gabrg1)
DKK3	171548	Rattus	norvegicus	dickkopf	WNT	signaling	pathway	inhibitor	3(Dkk3)
SULT2B1	292915	Rattus	norvegicus	sulfotransferase	family	2B	member	1(Sult2b1)
ZC2HC1C	314321	Rattus	norvegicus	zinc	finger,	C2HC-type	containing	1C(Zc2hc1c)
CLDN3	65130	Rattus	norvegicus	claudin	3(Cldn3)
MTHFD2	680308	Rattus	norvegicus	methylenetetrahydrofolate	dehydrogenase	(NADP+	dependent)	2,	methenyltetrahydrofolate	cyclohydrolase(Mthfd2)
TFR2	288562	Rattus	norvegicus	transferrin	receptor	2(Tfr2)
HECW1	291209	Rattus	norvegicus	HECT,	C2	and	WW	domain	containing	E3	ubiquitin	protein	ligase	1(Hecw1)
CLDN7	65132	Rattus	norvegicus	claudin	7(Cldn7)
DDIT4	140942	Rattus	norvegicus	DNA-damage-inducible	transcript	4(Ddit4)
ORAI2	304592	Rattus	norvegicus	ORAI	calcium	release-activated	calcium	modulator	2(Orai2)
PADI3	29520	Rattus	norvegicus	peptidyl	arginine	deiminase	3(Padi3)
LOC500227	500227	Rattus	norvegicus	hypothetical	gene	supported	by	BC079424(LOC500227)
PADI2	29511	Rattus	norvegicus	peptidyl	arginine	deiminase	2(Padi2)
PRKD1	85421	Rattus	norvegicus	protein	kinase	D1(Prkd1)
ASTN2	100361323	Rattus	norvegicus	astrotactin	2(Astn2)
SKAP1	286975	Rattus	norvegicus	src	kinase	associated	phosphoprotein	1(Skap1)
FREM3	307767	Rattus	norvegicus	FRAS1	related	extracellular	matrix	3(Frem3)
ASTN1	304900	Rattus	norvegicus	astrotactin	1(Astn1)
RPS4Y2	690845	Rattus	norvegicus	ribosomal	protein	S4,	Y-linked	2(Rps4y2)
MIR196C	100314204	Rattus	norvegicus	microRNA	196c(Mir196c)
PHYHIPL	309901	Rattus	norvegicus	phytanoyl-CoA	2-hydroxylase	interacting	protein-like(Phyhipl)
LYPD3	60378	Rattus	norvegicus	Ly6/Plaur	domain	containing	3(Lypd3)
GATA4	54254	Rattus	norvegicus	GATA	binding	protein	4(Gata4)
GATA3	85471	Rattus	norvegicus	GATA	binding	protein	3(Gata3)
TAPBPL	297602	Rattus	norvegicus	TAP	binding	protein-like(Tapbpl)
AAAS	300259	Rattus	norvegicus	aladin	WD	repeat	nucleoporin(Aaas)
SLC5A5	114613	Rattus	norvegicus	solute	carrier	family	5	member	5(Slc5a5)
UGT8	50555	Rattus	norvegicus	UDP	glycosyltransferase	8(Ugt8)
FLRT2	299236	Rattus	norvegicus	fibronectin	leucine	rich	transmembrane	protein	2(Flrt2)
GALR3	29235	Rattus	norvegicus	galanin	receptor	3(Galr3)
ALX3	365900	Rattus	norvegicus	ALX	homeobox	3(Alx3)
SYNDIG1	362235	Rattus	norvegicus	synapse	differentiation	inducing	1(Syndig1)
ALX4	296511	Rattus	norvegicus	ALX	homeobox	4(Alx4)
ALX1	25401	Rattus	norvegicus	ALX	homeobox	1(Alx1)
PCDHA2	393086	Rattus	norvegicus	protocadherin	alpha	2(Pcdha2)
HOXC8	24460	Rattus	norvegicus	homeobox	C8(Hoxc8)
NKX2-2	366214	Rattus	norvegicus	NK2	homeobox	2(Nkx2-2)
WNT10B	315294	Rattus	norvegicus	wingless-type	MMTV	integration	site	family,	member	10B(Wnt10b)
WNT10A	316527	Rattus	norvegicus	wingless-type	MMTV	integration	site	family,	member	10A(Wnt10a)
AFAP1L2	292130	Rattus	norvegicus	actin	filament	associated	protein	1-like	2(Afap1l2)
FZD2	64512	Rattus	norvegicus	frizzled	class	receptor	2(Fzd2)
CADM4	365216	Rattus	norvegicus	cell	adhesion	molecule	4(Cadm4)
ARPP21	363153	Rattus	norvegicus	cAMP	regulated	phosphoprotein	21(Arpp21)
NR2F1	81808	Rattus	norvegicus	nuclear	receptor	subfamily	2,	group	F,	member	1(Nr2f1)
NR2F2	113984	Rattus	norvegicus	nuclear	receptor	subfamily	2,	group	F,	member	2(Nr2f2)
NR1D1	252917	Rattus	norvegicus	nuclear	receptor	subfamily	1,	group	D,	member	1(Nr1d1)
GRIN2C	24411	Rattus	norvegicus	glutamate	ionotropic	receptor	NMDA	type	subunit	2C(Grin2c)
FOSL2	25446	Rattus	norvegicus	FOS	like	2,	AP-1	transcription	factor	subunit(Fosl2)
PCDHGA10	498849	Rattus	norvegicus	protocadherin	gamma	subfamily	A,	10(Pcdhga10)
PCDHGA11	252897	Rattus	norvegicus	protocadherin	gamma	subfamily	A,	11(Pcdhga11)
PCDHGA12	498850	Rattus	norvegicus	protocadherin	gamma	subfamily	A,	12(Pcdhga12)
CPEB1	293056	Rattus	norvegicus	cytoplasmic	polyadenylation	element	binding	protein	1(Cpeb1)
MEX3B	308790	Rattus	norvegicus	mex-3	RNA	binding	family	member	B(Mex3b)
FAT3	191571	Rattus	norvegicus	FAT	atypical	cadherin	3(Fat3)
PPT2	54398	Rattus	norvegicus	palmitoyl-protein	thioesterase	2(Ppt2)
HOXD3	288152	Rattus	norvegicus	homeo	box	D3(Hoxd3)
CEP89	292811	Rattus	norvegicus	centrosomal	protein	89(Cep89)
CDKN1C	246060	Rattus	norvegicus	cyclin-dependent	kinase	inhibitor	1C(Cdkn1c)
BTG2	29619	Rattus	norvegicus	BTG	anti-proliferation	factor	2(Btg2)
ARHGAP8	300115	Rattus	norvegicus	Rho	GTPase	activating	protein	8(Arhgap8)
GPR26	192153	Rattus	norvegicus	G	protein-coupled	receptor	26(Gpr26)
KCNC1	25327	Rattus	norvegicus	potassium	voltage-gated	channel	subfamily	C	member	1(Kcnc1)
KCNC3	117101	Rattus	norvegicus	potassium	voltage-gated	channel	subfamily	C	member	3(Kcnc3)
NCAN	58982	Rattus	norvegicus	neurocan(Ncan)
TCF21	252856	Rattus	norvegicus	transcription	factor	21(Tcf21)
PYGM	24701	Rattus	norvegicus	phosphorylase,	glycogen,	muscle(Pygm)
LRRC32	293135	Rattus	norvegicus	leucine	rich	repeat	containing	32(Lrrc32)
GLI3	140588	Rattus	norvegicus	GLI	family	zinc	finger	3(Gli3)
PANX2	362979	Rattus	norvegicus	pannexin	2(Panx2)
TRIM6	293294	Rattus	norvegicus	tripartite	motif	containing	6(Trim6)
SMPD5	100359829	Rattus	norvegicus	sphingomyelin	phosphodiesterase	5(Smpd5)
ADAMTSL5	314626	Rattus	norvegicus	ADAMTS-like	5(Adamtsl5)
RBPMS2	503214	Rattus	norvegicus	RNA	binding	protein	with	multiple	splicing	2(Rbpms2)
TEAD3	294299	Rattus	norvegicus	TEA	domain	transcription	factor	3(Tead3)
CHST8	308511	Rattus	norvegicus	carbohydrate	sulfotransferase	8(Chst8)
MYOG	29148	Rattus	norvegicus	myogenin(Myog)
GPR37	117549	Rattus	norvegicus	G	protein-coupled	receptor	37(Gpr37)
KCND2	65180	Rattus	norvegicus	potassium	voltage-gated	channel	subfamily	D	member	2(Kcnd2)
SPHK1	170897	Rattus	norvegicus	sphingosine	kinase	1(Sphk1)
RIPK4	304053	Rattus	norvegicus	receptor-interacting	serine-threonine	kinase	4(Ripk4)
EN2	499964	Rattus	norvegicus	engrailed	homeobox	2(En2)
PRSS16	364719	Rattus	norvegicus	protease,	serine	16(Prss16)
PAX5	500453	Rattus	norvegicus	paired	box	5(Pax5)
PAX2	293992	Rattus	norvegicus	paired	box	2(Pax2)
CDYL2	292044	Rattus	norvegicus	chromodomain	Y-like	2(Cdyl2)
PAX1	311505	Rattus	norvegicus	paired	box	1(Pax1)
TUBB2B	291081	Rattus	norvegicus	tubulin,	beta	2B	class	IIb(Tubb2b)
FAM222A	498193	Rattus	norvegicus	family	with	sequence	similarity	222,	member	A(Fam222a)
MMP15	291848	Rattus	norvegicus	matrix	metallopeptidase	15(Mmp15)
PAX7	500574	Rattus	norvegicus	paired	box	7(Pax7)
KCNMA1	83731	Rattus	norvegicus	potassium	calcium-activated	channel	subfamily	M	alpha	1(Kcnma1)
DSCAML1	315615	Rattus	norvegicus	DS	cell	adhesion	molecule-like	1(Dscaml1)
PLCB2	85240	Rattus	norvegicus	phospholipase	C,	beta	2(Plcb2)
CHST5	307859	Rattus	norvegicus	carbohydrate	(N-acetylglucosamine	6-O)	sulfotransferase	5(Chst5)
JDP2	116674	Rattus	norvegicus	Jun	dimerization	protein	2(Jdp2)
PLPPR5	310812	Rattus	norvegicus	phospholipid	phosphatase	related	5(Plppr5)
KCNA4	25469	Rattus	norvegicus	potassium	voltage-gated	channel	subfamily	A	member	4(Kcna4)
HOXD13	288154	Rattus	norvegicus	homeo	box	D13(Hoxd13)
PRSS46	408245	Rattus	norvegicus	protease,	serine,	46(Prss46)
HOXD12	366082	Rattus	norvegicus	homeo	box	D12(Hoxd12)
FSTL1	79210	Rattus	norvegicus	follistatin-like	1(Fstl1)
FAM117B	363236	Rattus	norvegicus	family	with	sequence	similarity	117,	member	B(Fam117b)
CHRND	54240	Rattus	norvegicus	cholinergic	receptor	nicotinic	delta	subunit(Chrnd)
GBX2	114500	Rattus	norvegicus	gastrulation	brain	homeobox	2(Gbx2)
GBX1	246149	Rattus	norvegicus	gastrulation	brain	homeobox	1(Gbx1)
RPS3	140654	Rattus	norvegicus	ribosomal	protein	S3(Rps3)
CSMD1	364634	Rattus	norvegicus	CUB	and	Sushi	multiple	domains	1(Csmd1)
GPR158	291352	Rattus	norvegicus	G	protein-coupled	receptor	158(Gpr158)
RGD1562024	498699	Rattus	norvegicus	RGD1562024(RGD1562024)
GABRA1	29705	Rattus	norvegicus	gamma-aminobutyric	acid	type	A	receptor	alpha1	subunit(Gabra1)
RIC3	687147	Rattus	norvegicus	RIC3	acetylcholine	receptor	chaperone(Ric3)
EGLN3	54702	Rattus	norvegicus	egl-9	family	hypoxia-inducible	factor	3(Egln3)
DMTN	361069	Rattus	norvegicus	dematin	actin	binding	protein(Dmtn)
GSN	296654	Rattus	norvegicus	gelsolin(Gsn)
GSX1	288457	Rattus	norvegicus	GS	homeobox	1(Gsx1)
GABRA5	29707	Rattus	norvegicus	gamma-aminobutyric	acid	type	A	receptor	alpha	5	subunit(Gabra5)
CDKN2A	25163	Rattus	norvegicus	cyclin-dependent	kinase	inhibitor	2A(Cdkn2a)
KCNB2	117105	Rattus	norvegicus	potassium	voltage-gated	channel	subfamily	B	member	2(Kcnb2)
F12	306761	Rattus	norvegicus	coagulation	factor	XII(F12)
LAPTM5	89783	Rattus	norvegicus	lysosomal	protein	transmembrane	5(Laptm5)
UNCX	29375	Rattus	norvegicus	UNC	homeobox(Uncx)
SNX20	307742	Rattus	norvegicus	sorting	nexin	20(Snx20)
SMOC2	292401	Rattus	norvegicus	SPARC	related	modular	calcium	binding	2(Smoc2)
WT1	24883	Rattus	norvegicus	Wilms	tumor	1(Wt1)
PLCD3	287745	Rattus	norvegicus	phospholipase	C,	delta	3(Plcd3)
PTF1A	117034	Rattus	norvegicus	pancreas	specific	transcription	factor,	1a(Ptf1a)
CCL27	362505	Rattus	norvegicus	C-C	motif	chemokine	ligand	27(Ccl27)
OLFML2B	304960	Rattus	norvegicus	olfactomedin-like	2B(Olfml2b)
EXOC3L4	299338	Rattus	norvegicus	exocyst	complex	component	3-like	4(Exoc3l4)
GPR68	314386	Rattus	norvegicus	G	protein-coupled	receptor	68(Gpr68)
CLSTN1	313717	Rattus	norvegicus	calsyntenin	1(Clstn1)
HR	60563	Rattus	norvegicus	hair	growth	associated(Hr)
MSI1	259272	Rattus	norvegicus	musashi	RNA-binding	protein	1(Msi1)
FRY	304244	Rattus	norvegicus	FRY	microtubule	binding	protein(Fry)
FGF3	170633	Rattus	norvegicus	fibroblast	growth	factor	3(Fgf3)
HID1	287822	Rattus	norvegicus	HID1	domain	containing(Hid1)
CDH7	29162	Rattus	norvegicus	cadherin	7(Cdh7)
NRBP2	680451	Rattus	norvegicus	nuclear	receptor	binding	protein	2(Nrbp2)
CDH3	116777	Rattus	norvegicus	cadherin	3(Cdh3)
ABHD11	360831	Rattus	norvegicus	abhydrolase	domain	containing	11(Abhd11)
SALL1	307740	Rattus	norvegicus	spalt-like	transcription	factor	1(Sall1)
CDH2	83501	Rattus	norvegicus	cadherin	2(Cdh2)
MPC1	171087	Rattus	norvegicus	mitochondrial	pyruvate	carrier	1(Mpc1)
GRAP2	366962	Rattus	norvegicus	GRB2-related	adaptor	protein	2(Grap2)
PITX2	54284	Rattus	norvegicus	paired-like	homeodomain	2(Pitx2)
PITX1	113983	Rattus	norvegicus	paired-like	homeodomain	1(Pitx1)
PHLDA1	29380	Rattus	norvegicus	pleckstrin	homology-like	domain,	family	A,	member	1(Phlda1)
TCP11	309641	Rattus	norvegicus	t-complex	11(Tcp11)
PCDHAC2	393092	Rattus	norvegicus	protocadherin	alpha	subfamily	C,	2(Pcdhac2)
LZTS3	280670	Rattus	norvegicus	leucine	zipper	tumor	suppressor	family	member	3(Lzts3)
TOR3A	304884	Rattus	norvegicus	torsin	family	3,	member	A(Tor3a)
TLE2	299636	Rattus	norvegicus	transducin-like	enhancer	of	split	2(Tle2)
BTN1A1	306956	Rattus	norvegicus	butyrophilin,	subfamily	1,	member	A1(Btn1a1)
SARS	266975	Rattus	norvegicus	seryl-tRNA	synthetase(Sars)
DIO3	29475	Rattus	norvegicus	deiodinase,	iodothyronine,	type	III(Dio3)
TUBA4A	316531	Rattus	norvegicus	tubulin,	alpha	4A(Tuba4a)
RNF41	362814	Rattus	norvegicus	ring	finger	protein	41(Rnf41)
CACNB3	25297	Rattus	norvegicus	calcium	voltage-gated	channel	auxiliary	subunit	beta	3(Cacnb3)
TSSK6	290670	Rattus	norvegicus	testis-specific	serine	kinase	6(Tssk6)
PHPT1	296571	Rattus	norvegicus	phosphohistidine	phosphatase	1(Phpt1)
SRSF6	362264	Rattus	norvegicus	serine	and	arginine	rich	splicing	factor	6(Srsf6)
AJUBA	85265	Rattus	norvegicus	ajuba	LIM	protein(Ajuba)
LY6E	362934	Rattus	norvegicus	lymphocyte	antigen	6	complex,	locus	E(Ly6e)
DLX1	296500	Rattus	norvegicus	distal-less	homeobox	1(Dlx1)
GRIA2	29627	Rattus	norvegicus	glutamate	ionotropic	receptor	AMPA	type	subunit	2(Gria2)
SHC3	114858	Rattus	norvegicus	SHC	adaptor	protein	3(Shc3)
KCNE3	63883	Rattus	norvegicus	potassium	voltage-gated	channel	subfamily	E	regulatory	subunit	3(Kcne3)
NOTCH4	406162	Rattus	norvegicus	notch	4(Notch4)
NEUROD2	54276	Rattus	norvegicus	neuronal	differentiation	2(Neurod2)
SOCS3	89829	Rattus	norvegicus	suppressor	of	cytokine	signaling	3(Socs3)
NKX6-1	65193	Rattus	norvegicus	NK6	homeobox	1(Nkx6-1)
NPTX2	288475	Rattus	norvegicus	neuronal	pentraxin	2(Nptx2)
BDNF	24225	Rattus	norvegicus	brain-derived	neurotrophic	factor(Bdnf)
B3GALT4	171079	Rattus	norvegicus	Beta-1,3-galactosyltransferase	4(B3galt4)
HTR1A	24473	Rattus	norvegicus	5-hydroxytryptamine	receptor	1A(Htr1a)
FANCE	309643	Rattus	norvegicus	Fanconi	anemia,	complementation	group	E(Fance)
BTBD9	294318	Rattus	norvegicus	BTB	domain	containing	9(Btbd9)
SCRT1	366951	Rattus	norvegicus	scratch	family	transcriptional	repressor	1(Scrt1)
LRCH1	502020	Rattus	norvegicus	leucine	rich	repeats	and	calponin	homology	domain	containing	1(Lrch1)
MAFB	54264	Rattus	norvegicus	MAF	bZIP	transcription	factor	B(Mafb)
LHX2	296706	Rattus	norvegicus	LIM	homeobox	2(Lhx2)
RCAN3	362627	Rattus	norvegicus	RCAN	family	member	3(Rcan3)
SP5	296510	Rattus	norvegicus	Sp5	transcription	factor(Sp5)
LHX6	311901	Rattus	norvegicus	LIM	homeobox	6(Lhx6)
SP8	299499	Rattus	norvegicus	Sp8	transcription	factor(Sp8)
LHX5	124451	Rattus	norvegicus	LIM	homeobox	5(Lhx5)
CSPG4	81651	Rattus	norvegicus	chondroitin	sulfate	proteoglycan	4(Cspg4)
SP9	366078	Rattus	norvegicus	Sp9	transcription	factor(Sp9)
DYSF	312492	Rattus	norvegicus	dysferlin(Dysf)
ADRA1D	29413	Rattus	norvegicus	adrenoceptor	alpha	1D(Adra1d)
SYNE3	299356	Rattus	norvegicus	spectrin	repeat	containing,	nuclear	envelope	family	member	3(Syne3)
INSL6	50546	Rattus	norvegicus	insulin-like	6(Insl6)
FUNDC2	361288	Rattus	norvegicus	FUN14	domain	containing	2(Fundc2)
ARL5C	497990	Rattus	norvegicus	ADP-ribosylation	factor	like	GTPase	5C(Arl5c)
ADAMTS9	312566	Rattus	norvegicus	ADAM	metallopeptidase	with	thrombospondin	type	1	motif,	9(Adamts9)
SMIM12	685634	Rattus	norvegicus	small	integral	membrane	protein	12(Smim12)
GRID2	79220	Rattus	norvegicus	glutamate	ionotropic	receptor	delta	type	subunit	2(Grid2)
GPX2	29326	Rattus	norvegicus	glutathione	peroxidase	2(Gpx2)
EMX2	499380	Rattus	norvegicus	empty	spiracles	homeobox	2(Emx2)
DNMT3A	444984	Rattus	norvegicus	DNA	methyltransferase	3	alpha(Dnmt3a)
KCNAB3	58981	Rattus	norvegicus	potassium	voltage-gated	channel	subfamily	A	regulatory	beta	subunit	3(Kcnab3)
ADRA2C	24175	Rattus	norvegicus	adrenoceptor	alpha	2C(Adra2c)
C1QL1	363686	Rattus	norvegicus	complement	C1q	like	1(C1ql1)
PTP4A2	85237	Rattus	norvegicus	protein	tyrosine	phosphatase	type	IVA,	member	2(Ptp4a2)
POM121L2	502128	Rattus	norvegicus	POM121	transmembrane	nucleoporin-like	2(Pom121l2)
ETV3L	499651	Rattus	norvegicus	ets	variant	3-like(Etv3l)
ADORA2A	25369	Rattus	norvegicus	adenosine	A2a	receptor(Adora2a)
ADORA2B	29316	Rattus	norvegicus	adenosine	A2B	receptor(Adora2b)
LCK	313050	Rattus	norvegicus	LCK	proto-oncogene,	Src	family	tyrosine	kinase(Lck)
BIRC5	64041	Rattus	norvegicus	baculoviral	IAP	repeat-containing	5(Birc5)
TMBIM6	24822	Rattus	norvegicus	transmembrane	BAX	inhibitor	motif	containing	6(Tmbim6)
CRP	25419	Rattus	norvegicus	C-reactive	protein(Crp)
HDAC5	84580	Rattus	norvegicus	histone	deacetylase	5(Hdac5)
NLGN1	116647	Rattus	norvegicus	neuroligin	1(Nlgn1)
BARX1	364680	Rattus	norvegicus	BARX	homeobox	1(Barx1)
TSPAN33	500065	Rattus	norvegicus	tetraspanin	33(Tspan33)
ZBTB40	362635	Rattus	norvegicus	zinc	finger	and	BTB	domain	containing	40(Zbtb40)
PTPRZ1	25613	Rattus	norvegicus	protein	tyrosine	phosphatase,	receptor	type	Z1(Ptprz1)
IL21R	308977	Rattus	norvegicus	interleukin	21	receptor(Il21r)
NF1X	81524	Rattus	norvegicus	nuclear	factor	1	X(Nf1x)
CACNG2	84347	Rattus	norvegicus	calcium	voltage-gated	channel	auxiliary	subunit	gamma	2(Cacng2)
SLC13A5	266998	Rattus	norvegicus	solute	carrier	family	13	member	5(Slc13a5)
CCDC71	498678	Rattus	norvegicus	coiled-coil	domain	containing	71(Ccdc71)
CACNG4	140725	Rattus	norvegicus	calcium	voltage-gated	channel	auxiliary	subunit	gamma	4(Cacng4)
DRGX	252880	Rattus	norvegicus	dorsal	root	ganglia	homeobox(Drgx)
TBX1	360737	Rattus	norvegicus	T-box	1(Tbx1)
IRX1	306659	Rattus	norvegicus	iroquois	homeobox	1(Irx1)
IRX2	306657	Rattus	norvegicus	iroquois	homeobox	2(Irx2)
ANGPT2	89805	Rattus	norvegicus	angiopoietin	2(Angpt2)
RNGTT	313131	Rattus	norvegicus	RNA	guanylyltransferase	and	5'-phosphatase(Rngtt)
IRX3	307721	Rattus	norvegicus	iroquois	homeobox	3(Irx3)
ZFP316	304293	Rattus	norvegicus	zinc	finger	protein	316(Zfp316)
PCDH8	64865	Rattus	norvegicus	protocadherin	8(Pcdh8)
IRX4	306655	Rattus	norvegicus	iroquois	homeobox	4(Irx4)
DONSON	288257	Rattus	norvegicus	downstream	neighbor	of	SON(Donson)
SEMA4F	29745	Rattus	norvegicus	ssemaphorin	4F(Sema4f)
MIR935	100314272	Rattus	norvegicus	microRNA	935(Mir935)
SGCZ	364605	Rattus	norvegicus	sarcoglycan	zeta(Sgcz)
KLF3	114845	Rattus	norvegicus	Kruppel	like	factor	3(Klf3)
TBX4	303399	Rattus	norvegicus	T-box	4(Tbx4)
TBX3	353305	Rattus	norvegicus	T-box	3(Tbx3)
ASS1	25698	Rattus	norvegicus	argininosuccinate	synthase	1(Ass1)
KLF2	306330	Rattus	norvegicus	Kruppel-like	factor	2(Klf2)
KBTBD11	306617	Rattus	norvegicus	kelch	repeat	and	BTB	domain	containing	11(Kbtbd11)
TBX2	303398	Rattus	norvegicus	T-box	2(Tbx2)
POLR3B	362858	Rattus	norvegicus	RNA	polymerase	III	subunit	B(Polr3b)
LEP	25608	Rattus	norvegicus	leptin(Lep)
SYT10	60567	Rattus	norvegicus	synaptotagmin	10(Syt10)
NT5C1A	313574	Rattus	norvegicus	5'-nucleotidase,	cytosolic	IA(Nt5c1a)
MAB21L1	688394	Rattus	norvegicus	mab-21	like	1(Mab21l1)
MAB21L2	680102	Rattus	norvegicus	mab-21	like	2(Mab21l2)
CD247	25300	Rattus	norvegicus	Cd247	molecule(Cd247)
CBLN4	499947	Rattus	norvegicus	cerebellin	4	precursor(Cbln4)
MDGA2	314180	Rattus	norvegicus	MAM	domain	containing	glycosylphosphatidylinositol	anchor	2(Mdga2)
NECTIN2	308417	Rattus	norvegicus	nectin	cell	adhesion	molecule	2(Nectin2)
NECTIN1	192183	Rattus	norvegicus	nectin	cell	adhesion	molecule	1(Nectin1)
GLTP	288707	Rattus	norvegicus	glycolipid	transfer	protein(Gltp)
FOXI3	502846	Rattus	norvegicus	forkhead	box	I3(Foxi3)
SOX2	499593	Rattus	norvegicus	SRY	box	2(Sox2)
GOLGA4	501069	Rattus	norvegicus	golgin	A4(Golga4)
TRIM25	494338	Rattus	norvegicus	tripartite	motif-containing	25(Trim25)
SOX9	140586	Rattus	norvegicus	SRY	box	9(Sox9)
KIF21B	289397	Rattus	norvegicus	kinesin	family	member	21B(Kif21b)
SOX7	290317	Rattus	norvegicus	SRY	box	7(Sox7)
LGALS7	29518	Rattus	norvegicus	galectin	7(Lgals7)
TMPO	25359	Rattus	norvegicus	thymopoietin(Tmpo)
EPHA5	79208	Rattus	norvegicus	EPH	receptor	A5(Epha5)
EPHA7	171287	Rattus	norvegicus	Eph	receptor	A7(Epha7)
FBXO2	85273	Rattus	norvegicus	F-box	protein	2(Fbxo2)
NSMCE1	361645	Rattus	norvegicus	NSE1	homolog,	SMC5-SMC6	complex	component(Nsmce1)
EBF1	116543	Rattus	norvegicus	early	B-cell	factor	1(Ebf1)
EBF2	361060	Rattus	norvegicus	early	B-cell	factor	2(Ebf2)
HNF1B	25640	Rattus	norvegicus	HNF1	homeobox	B(Hnf1b)
EBF3	361668	Rattus	norvegicus	early	B-cell	factor	3(Ebf3)
RUNX3	156726	Rattus	norvegicus	runt-related	transcription	factor	3(Runx3)
JMJD6	360665	Rattus	norvegicus	jumonji	domain	containing	6(Jmjd6)
RUNX1	50662	Rattus	norvegicus	runt-related	transcription	factor	1(Runx1)
FNDC1	308099	Rattus	norvegicus	fibronectin	type	III	domain	containing	1(Fndc1)
RRAGD	297960	Rattus	norvegicus	Ras-related	GTP	binding	D(Rragd)
TRIM14	313236	Rattus	norvegicus	tripartite	motif-containing	14(Trim14)
SUCLG2	362404	Rattus	norvegicus	succinate-CoA	ligase,	GDP-forming,	beta	subunit(Suclg2)
KDELR2	304290	Rattus	norvegicus	KDEL	endoplasmic	reticulum	protein	retention	receptor	2(Kdelr2)
NECAB2	170928	Rattus	norvegicus	N-terminal	EF-hand	calcium	binding	protein	2(Necab2)
PLEKHD1	500685	Rattus	norvegicus	pleckstrin	homology	and	coiled-coil	domain	containing	D1(Plekhd1)
NUMBL	292732	Rattus	norvegicus	NUMB-like,	endocytic	adaptor	protein(Numbl)
SLC35D3	308717	Rattus	norvegicus	solute	carrier	family	35,	member	D3(Slc35d3)
FOXG1	24370	Rattus	norvegicus	forkhead	box	G1(Foxg1)
SMIM1	500595	Rattus	norvegicus	small	integral	membrane	protein	1(Smim1)
TRANK1	316022	Rattus	norvegicus	tetratricopeptide	repeat	and	ankyrin	repeat	containing	1(Trank1)
WNK4	287715	Rattus	norvegicus	WNK	lysine	deficient	protein	kinase	4(Wnk4)
TGFA	24827	Rattus	norvegicus	transforming	growth	factor	alpha(Tgfa)
TEX261	297392	Rattus	norvegicus	testis	expressed	261(Tex261)
NUAK1	299694	Rattus	norvegicus	NUAK	family	kinase	1(Nuak1)
ARSI	307404	Rattus	norvegicus	arylsulfatase	family,	member	I(Arsi)
ATP6V1C2	362802	Rattus	norvegicus	ATPase	H+	transporting	V1	subunit	C2(Atp6v1c2)
EGR3	25148	Rattus	norvegicus	early	growth	response	3(Egr3)
EGR4	25129	Rattus	norvegicus	early	growth	response	4(Egr4)
ST8SIA1	25280	Rattus	norvegicus	ST8	alpha-N-acetyl-neuraminide	alpha-2,8-sialyltransferase	1(St8sia1)
PCDH20	306081	Rattus	norvegicus	protocadherin	20(Pcdh20)
RANBP17	303029	Rattus	norvegicus	RAN	binding	protein	17(Ranbp17)
ST8SIA3	25547	Rattus	norvegicus	ST8	alpha-N-acetyl-neuraminide	alpha-2,8-sialyltransferase	3(St8sia3)
SUCO	360863	Rattus	norvegicus	SUN	domain	containing	ossification	factor(Suco)
CYP26A1	154985	Rattus	norvegicus	cytochrome	P450,	family	26,	subfamily	a,	polypeptide	1(Cyp26a1)
PPP1R1B	360616	Rattus	norvegicus	protein	phosphatase	1,	regulatory	(inhibitor)	subunit	1B(Ppp1r1b)
PDE3A	50678	Rattus	norvegicus	phosphodiesterase	3A(Pde3a)
RGL3	300444	Rattus	norvegicus	ral	guanine	nucleotide	dissociation	stimulator-like	3(Rgl3)
ECHDC3	684538	Rattus	norvegicus	enoyl	CoA	hydratase	domain	containing	3(Echdc3)
SIM1	309888	Rattus	norvegicus	single-minded	family	bHLH	transcription	factor	1(Sim1)
SIM2	304071	Rattus	norvegicus	single-minded	family	bHLH	transcription	factor	2(Sim2)
TECPR1	304285	Rattus	norvegicus	tectonin	beta-propeller	repeat	containing	1(Tecpr1)
CLIC6	304081	Rattus	norvegicus	chloride	intracellular	channel	6(Clic6)
SUV39H2	364785	Rattus	norvegicus	suppressor	of	variegation	2022-03-09	homolog	2(Suv39h2)
BARHL2	65050	Rattus	norvegicus	BarH-like	homeobox	2(Barhl2)
FOXE3	171302	Rattus	norvegicus	forkhead	box	E3(Foxe3)
TMEM151B	301253	Rattus	norvegicus	transmembrane	protein	151B(Tmem151b)
DIRAS1	366826	Rattus	norvegicus	DIRAS	family	GTPase	1(Diras1)
GRIK5	24407	Rattus	norvegicus	glutamate	ionotropic	receptor	kainate	type	subunit	5(Grik5)
PTPRO	50677	Rattus	norvegicus	protein	tyrosine	phosphatase,	receptor	type,	O(Ptpro)
IL24	170819	Rattus	norvegicus	interleukin	24(Il24)
GRIK3	298521	Rattus	norvegicus	glutamate	ionotropic	receptor	kainate	type	subunit	3(Grik3)
SLC7A14	499587	Rattus	norvegicus	solute	carrier	family	7,	member	14(Slc7a14)
CTSW	293676	Rattus	norvegicus	cathepsin	W(Ctsw)
GRIK1	29559	Rattus	norvegicus	glutamate	ionotropic	receptor	kainate	type	subunit	1(Grik1)
BMI1	307151	Rattus	norvegicus	BMI1	proto-oncogene,	polycomb	ring	finger(Bmi1)
HERPUD1	85430	Rattus	norvegicus	homocysteine	inducible	ER	protein	with	ubiquitin	like	domain	1(Herpud1)
ESM1	64536	Rattus	norvegicus	endothelial	cell-specific	molecule	1(Esm1)
CRTAC1	171438	Rattus	norvegicus	cartilage	acidic	protein	1(Crtac1)
SLC22A18	309131	Rattus	norvegicus	solute	carrier	family	22,	member	18(Slc22a18)
CCR7	287673	Rattus	norvegicus	C-C	motif	chemokine	receptor	7(Ccr7)
QSOX2	681023	Rattus	norvegicus	quiescin	sulfhydryl	oxidase	2(Qsox2)
FEZF2	305719	Rattus	norvegicus	Fez	family	zinc	finger	2(Fezf2)
FEZF1	500048	Rattus	norvegicus	Fez	family	zinc	finger	1(Fezf1)
L3HYPDH	314214	Rattus	norvegicus	trans-L-3-hydroxyproline	dehydratase(L3hypdh)
PTPRV	64576	Rattus	norvegicus	protein	tyrosine	phosphatase,	receptor	type,	V(Ptprv)
PRMT8	688502	Rattus	norvegicus	protein	arginine	methyltransferase	8(Prmt8)
FOXD1	171299	Rattus	norvegicus	forkhead	box	D1(Foxd1)
PARP1	25591	Rattus	norvegicus	poly	(ADP-ribose)	polymerase	1(Parp1)
GP1BB	116727	Rattus	norvegicus	glycoprotein	Ib	platelet	beta	subunit(Gp1bb)
SORCS1	309533	Rattus	norvegicus	sortilin-related	VPS10	domain	containing	receptor	1(Sorcs1)
PPHLN1	366975	Rattus	norvegicus	periphilin	1(Pphln1)
KREMEN2	287102	Rattus	norvegicus	kringle	containing	transmembrane	protein	2(Kremen2)
CBFA2T3	361431	Rattus	norvegicus	CBFA2/RUNX1	translocation	partner	3(Cbfa2t3)
MN1	498194	Rattus	norvegicus	meningioma	1(Mn1)
MIR328B	100526626	Rattus	norvegicus	microRNA	328b(Mir328b)
MZB1	291675	Rattus	norvegicus	marginal	zone	B	and	B1	cell-specific	protein(Mzb1)
B3GNT2	305571	Rattus	norvegicus	UDP-GlcNAc:betaGal	beta-1,3-N-acetylglucosaminyltransferase	2(B3gnt2)
PDZRN3	312607	Rattus	norvegicus	PDZ	domain	containing	RING	finger	3(Pdzrn3)
MATN4	296358	Rattus	norvegicus	matrilin	4(Matn4)
HMX1	360960	Rattus	norvegicus	H6	family	homeobox	1(Hmx1)
POPDC2	360718	Rattus	norvegicus	popeye	domain	containing	2(Popdc2)
NPB	259222	Rattus	norvegicus	neuropeptide	B(Npb)
FOXC2	171356	Rattus	norvegicus	forkhead	box	C2(Foxc2)
ZFP703	680717	Rattus	norvegicus	zinc	finger	protein	703(Zfp703)
TMPRSS3	309665	Rattus	norvegicus	transmembrane	protease,	serine	3(Tmprss3)
PRICKLE1	315259	Rattus	norvegicus	prickle	planar	cell	polarity	protein	1(Prickle1)
NOL4	307553	Rattus	norvegicus	nucleolar	protein	4(Nol4)
BEGAIN	79146	Rattus	norvegicus	brain-enriched	guanylate	kinase-associated(Begain)
MNT	287521	Rattus	norvegicus	MAX	network	transcriptional	repressor(Mnt)
GPC1	58920	Rattus	norvegicus	glypican	1(Gpc1)
KISS1R	78976	Rattus	norvegicus	KISS1	receptor(Kiss1r)
PAK7	311450	Rattus	norvegicus	p21	(RAC1)	activated	kinase	7(Pak7)
CILP2	306356	Rattus	norvegicus	cartilage	intermediate	layer	protein	2(Cilp2)
APBB1	29722	Rattus	norvegicus	amyloid	beta	precursor	protein	binding	family	B	member	1(Apbb1)
CTNNA2	297357	Rattus	norvegicus	catenin	alpha	2(Ctnna2)
MSX1	81710	Rattus	norvegicus	msh	homeobox	1(Msx1)
TRAM1L1	310846	Rattus	norvegicus	translocation	associated	membrane	protein	1-like	1(Tram1l1)
RELT	361615	Rattus	norvegicus	RELT	tumor	necrosis	factor	receptor(Relt)
GABBR1	81657	Rattus	norvegicus	gamma-aminobutyric	acid	type	B	receptor	subunit	1(Gabbr1)
DMRT1	114498	Rattus	norvegicus	doublesex	and	mab-3	related	transcription	factor	1(Dmrt1)
SUSD2	294335	Rattus	norvegicus	sushi	domain	containing	2(Susd2)
RFTN1	501095	Rattus	norvegicus	raftlin	lipid	raft	linker	1(Rftn1)
DMRT3	293976	Rattus	norvegicus	doublesex	and	mab-3	related	transcription	factor	3(Dmrt3)
DOHH	314644	Rattus	norvegicus	deoxyhypusine	hydroxylase/monooxygenase(Dohh)
SGSM1	288743	Rattus	norvegicus	small	G	protein	signaling	modulator	1(Sgsm1)
KCNS1	117023	Rattus	norvegicus	potassium	voltage-gated	channel,	modifier	subfamily	S,	member	1(Kcns1)
TJP3	314640	Rattus	norvegicus	tight	junction	protein	3(Tjp3)
FOXA2	25099	Rattus	norvegicus	forkhead	box	A2(Foxa2)
FOXA1	25098	Rattus	norvegicus	forkhead	box	A1(Foxa1)
CCDC167	689755	Rattus	norvegicus	coiled-coil	domain	containing	167(Ccdc167)
DCLRE1A	292127	Rattus	norvegicus	DNA	cross-link	repair	1A(Dclre1a)
PLVAP	56765	Rattus	norvegicus	plasmalemma	vesicle	associated	protein(Plvap)
GALNT16	362760	Rattus	norvegicus	polypeptide	N-acetylgalactosaminyltransferase	16(Galnt16)
LRCOL1	100363238	Rattus	norvegicus	leucine	rich	colipase-like	1(Lrcol1)
CYP46A1	362782	Rattus	norvegicus	cytochrome	P450,	family	46,	subfamily	a,	polypeptide	1(Cyp46a1)
NCMAP	689826	Rattus	norvegicus	noncompact	myelin	associated	protein(Ncmap)
ARHGAP35	306400	Rattus	norvegicus	Rho	GTPase	activating	protein	35(Arhgap35)
LOXL1	315714	Rattus	norvegicus	lysyl	oxidase-like	1(Loxl1)
GALNT10	170501	Rattus	norvegicus	polypeptide	N-acetylgalactosaminyltransferase	10(Galnt10)
MPZ	24564	Rattus	norvegicus	myelin	protein	zero(Mpz)
CMTR1	309656	Rattus	norvegicus	cap	methyltransferase	1(Cmtr1)
RGS7	54296	Rattus	norvegicus	regulator	of	G-protein	signaling	7(Rgs7)
GHSR	84022	Rattus	norvegicus	growth	hormone	secretagogue	receptor(Ghsr)
PDGFRA	25267	Rattus	norvegicus	platelet	derived	growth	factor	receptor	alpha(Pdgfra)
HFM1	690161	Rattus	norvegicus	HFM1,	ATP-dependent	DNA	helicase	homolog(Hfm1)
MSX2	25483	Rattus	norvegicus	msh	homeobox	2(Msx2)
MSX3	114504	Rattus	norvegicus	msh	homeobox	3(Msx3)
APLP1	502317	Rattus	norvegicus	amyloid	beta	precursor	like	protein	1(Aplp1)
KRT75	300247	Rattus	norvegicus	keratin	75(Krt75)
KLHL42	500367	Rattus	norvegicus	kelch-like	family,	member	42(Klhl42)
ADAM19	303068	Rattus	norvegicus	ADAM	metallopeptidase	domain	19(Adam19)
SELENOM	498398	Rattus	norvegicus	selenoprotein	M(Selenom)
RGD1310587	360894	Rattus	norvegicus	similar	to	hypothetical	protein	FLJ14146(RGD1310587)
GPD1	60666	Rattus	norvegicus	glycerol-3-phosphate	dehydrogenase	1(Gpd1)
SELENOV	499113	Rattus	norvegicus	selenoprotein	V(Selenov)
CHRNA3	25101	Rattus	norvegicus	cholinergic	receptor	nicotinic	alpha	3	subunit(Chrna3)
NPR1	24603	Rattus	norvegicus	natriuretic	peptide	receptor	1(Npr1)
CHRNA4	25590	Rattus	norvegicus	cholinergic	receptor	nicotinic	alpha	4	subunit(Chrna4)
NTM	50864	Rattus	norvegicus	neurotrimin(Ntm)
NXPH4	59316	Rattus	norvegicus	neurexophilin	4(Nxph4)
HPCA	29177	Rattus	norvegicus	hippocalcin(Hpca)
CACNA1B	257648	Rattus	norvegicus	calcium	voltage-gated	channel	subunit	alpha1	B(Cacna1b)
LTBP4	292734	Rattus	norvegicus	latent	transforming	growth	factor	beta	binding	protein	4(Ltbp4)
ALOX12	287454	Rattus	norvegicus	arachidonate	12-lipoxygenase,	12S	type(Alox12)
LTBP3	83838	Rattus	norvegicus	latent	transforming	growth	factor	beta	binding	protein	3(Ltbp3)
BHLHE23	499952	Rattus	norvegicus	basic	helix-loop-helix	family,	member	e23(Bhlhe23)
HOXB13	303480	Rattus	norvegicus	homeo	box	B13(Hoxb13)
TRHDE	366894	Rattus	norvegicus	thyrotropin-releasing	hormone	degrading	enzyme(Trhde)
FAM83H	362937	Rattus	norvegicus	family	with	sequence	similarity	83,	member	H(Fam83h)
RGD1309036	292874	Rattus	norvegicus	hypothetical	LOC292874(RGD1309036)
SCUBE3	294297	Rattus	norvegicus	signal	peptide,	CUB	domain	and	EGF	like	domain	containing	3(Scube3)
SNTG2	298936	Rattus	norvegicus	syntrophin,	gamma	2(Sntg2)
MYH14	308572	Rattus	norvegicus	myosin	heavy	chain	14(Myh14)
NDUFV3	64539	Rattus	norvegicus	NADH:ubiquinone	oxidoreductase	subunit	V3(Ndufv3)
OTX1	25646	Rattus	norvegicus	orthodenticle	homeobox	1(Otx1)
NXPH1	25501	Rattus	norvegicus	neurexophilin	1(Nxph1)
MARK4	680407	Rattus	norvegicus	microtubule	affinity	regulating	kinase	4(Mark4)
TFAP2C	362280	Rattus	norvegicus	transcription	factor	AP-2	gamma(Tfap2c)
TFAP2E	313596	Rattus	norvegicus	transcription	factor	AP-2	epsilon(Tfap2e)
UQCC2	361805	Rattus	norvegicus	ubiquinol-cytochrome	c	reductase	complex	assembly	factor	2(Uqcc2)
AZIN2	366473	Rattus	norvegicus	antizyme	inhibitor	2(Azin2)
NUP153	25281	Rattus	norvegicus	nucleoporin	153(Nup153)
HSPA2	60460	Rattus	norvegicus	heat	shock	protein	family	A	member	2(Hspa2)
BMP7	85272	Rattus	norvegicus	bone	morphogenetic	protein	7(Bmp7)
SYT7	59267	Rattus	norvegicus	synaptotagmin	7(Syt7)
NR4A2	54278	Rattus	norvegicus	nuclear	receptor	subfamily	4,	group	A,	member	2(Nr4a2)
AFDN	26955	Rattus	norvegicus	afadin,	adherens	junction	formation	factor(Afdn)
SPAG6L	291340	Rattus	norvegicus	sperm	associated	antigen	6-like(Spag6l)
NR4A3	58853	Rattus	norvegicus	nuclear	receptor	subfamily	4,	group	A,	member	3(Nr4a3)
ARHGAP30	498282	Rattus	norvegicus	Rho	GTPase	activating	protein	30(Arhgap30)
GDNF	25453	Rattus	norvegicus	glial	cell	derived	neurotrophic	factor(Gdnf)
CNTN2	25356	Rattus	norvegicus	contactin	2(Cntn2)
RADIL	304299	Rattus	norvegicus	Rap	associating	with	DIL	domain(Radil)
CNTN4	116658	Rattus	norvegicus	contactin	4(Cntn4)
FGF11	170632	Rattus	norvegicus	fibroblast	growth	factor	11(Fgf11)
FGFR1	79114	Rattus	norvegicus	Fibroblast	growth	factor	receptor	1(Fgfr1)
NFKBIB	81525	Rattus	norvegicus	NFKB	inhibitor	beta(Nfkbib)
GLP1R	25051	Rattus	norvegicus	glucagon-like	peptide	1	receptor(Glp1r)
PCDHGB7	364844	Rattus	norvegicus	protocadherin	gamma	subfamily	B,	7(Pcdhgb7)
DYRK2	314862	Rattus	norvegicus	dual	specificity	tyrosine	phosphorylation	regulated	kinase	2(Dyrk2)
SIX1	114634	Rattus	norvegicus	SIX	homeobox	1(Six1)
OXT	25504	Rattus	norvegicus	oxytocin/neurophysin	1	prepropeptide(Oxt)
NR2E1	684085	Rattus	norvegicus	nuclear	receptor	subfamily	2,	group	E,	member	1(Nr2e1)
TRIAP1	691278	Rattus	norvegicus	TP53	regulated	inhibitor	of	apoptosis	1(Triap1)
ELAVL2	286973	Rattus	norvegicus	ELAV	like	RNA	binding	protein	2(Elavl2)
ELAVL3	282824	Rattus	norvegicus	ELAV	like	RNA	binding	protein	3(Elavl3)
SIX6	314221	Rattus	norvegicus	SIX	homeobox	6(Six6)
NETO1	307206	Rattus	norvegicus	neuropilin	and	tolloid	like	1(Neto1)
SIX2	366542	Rattus	norvegicus	SIX	homeobox	2(Six2)
ZIC1	64618	Rattus	norvegicus	Zic	family	member	1(Zic1)
GDAP1L1	311616	Rattus	norvegicus	ganglioside-induced	differentiation-associated	protein	1-like	1(Gdap1l1)
GMPPA	501167	Rattus	norvegicus	GDP-mannose	pyrophosphorylase	A(Gmppa)
BLNK	499356	Rattus	norvegicus	B-cell	linker(Blnk)
DACT2	308212	Rattus	norvegicus	dishevelled-binding	antagonist	of	beta-catenin	2(Dact2)
SPEG	363256	Rattus	norvegicus	SPEG	complex	locus(Speg)
TGIF2	499929	Rattus	norvegicus	TGFB-induced	factor	homeobox	2(Tgif2)
CAMK1D	307124	Rattus	norvegicus	calcium/calmodulin-dependent	protein	kinase	ID(Camk1d)
OLIG3	293012	Rattus	norvegicus	oligodendrocyte	transcription	factor	3(Olig3)
PCDHGA3	498847	Rattus	norvegicus	protocadherin	gamma	subfamily	A,	3(Pcdhga3)
DCC	25311	Rattus	norvegicus	DCC	netrin	1	receptor(Dcc)
USP44	314746	Rattus	norvegicus	ubiquitin	specific	peptidase	44(Usp44)
RT1-DOA	24984	Rattus	norvegicus	RT1	class	II,	locus	DOa(RT1-DOa)
MSL3L2	309790	Rattus	norvegicus	male-specific	lethal	3-like	2	(Drosophila)(Msl3l2)
OLIG1	60394	Rattus	norvegicus	oligodendrocyte	transcription	factor	1(Olig1)
OLR1768	293878	Rattus	norvegicus	olfactory	receptor	1768(Olr1768)
AXIN2	29134	Rattus	norvegicus	axin	2(Axin2)
OLIG2	304103	Rattus	norvegicus	oligodendrocyte	lineage	transcription	factor	2(Olig2)
ETV3	295297	Rattus	norvegicus	ets	variant	3(Etv3)
PRODH1	680409	Rattus	norvegicus	proline	dehydrogenase	1(Prodh1)
KLF14	312203	Rattus	norvegicus	Kruppel-like	factor	14(Klf14)
PCDHGA9	252895	Rattus	norvegicus	protocadherin	gamma	subfamily	A,	9(Pcdhga9)
ZAP70	301348	Rattus	norvegicus	zeta	chain	of	T	cell	receptor	associated	protein	kinase	70(Zap70)
DNASE2	171575	Rattus	norvegicus	deoxyribonuclease	2,	lysosomal(Dnase2)
RN5-8S	100861534	Rattus	norvegicus	5.8S	ribosomal	RNA(Rn5-8s)
SHANK1	78957	Rattus	norvegicus	SH3	and	multiple	ankyrin	repeat	domains	1(Shank1)
ATP6V1B1	312488	Rattus	norvegicus	ATPase	H+	transporting	V1	subunit	B1(Atp6v1b1)
2022-09-09	83788	Rattus	norvegicus	septin	9(Sept9)
CRMP1	25415	Rattus	norvegicus	collapsin	response	mediator	protein	1(Crmp1)
RSPH9	316238	Rattus	norvegicus	radial	spoke	head	9	homolog(Rsph9)
LTC4S	114097	Rattus	norvegicus	leukotriene	C4	synthase(Ltc4s)
USP18	312688	Rattus	norvegicus	ubiquitin	specific	peptidase	18(Usp18)
GNA14	309242	Rattus	norvegicus	G	protein	subunit	alpha	14(Gna14)
ALDH1B1	298079	Rattus	norvegicus	aldehyde	dehydrogenase	1	family,	member	B1(Aldh1b1)
HLX	364069	Rattus	norvegicus	H2.0-like	homeobox(Hlx)
CNR1	25248	Rattus	norvegicus	cannabinoid	receptor	1(Cnr1)
TBX21	303496	Rattus	norvegicus	T-box	21(Tbx21)
GNG7	58979	Rattus	norvegicus	G	protein	subunit	gamma	7(Gng7)
CLVS2	361459	Rattus	norvegicus	clavesin	2(Clvs2)
NRIP3	361625	Rattus	norvegicus	nuclear	receptor	interacting	protein	3(Nrip3)
RGS20	362477	Rattus	norvegicus	regulator	of	G-protein	signaling	20(Rgs20)
S1PR3	306792	Rattus	norvegicus	sphingosine-1-phosphate	receptor	3(S1pr3)
HES3	64628	Rattus	norvegicus	hes	family	bHLH	transcription	factor	3(Hes3)
CDIPT	192260	Rattus	norvegicus	CDP-diacylglycerol--inositol	3-phosphatidyltransferase(Cdipt)
HES5	79225	Rattus	norvegicus	hes	family	bHLH	transcription	factor	5(Hes5)
OPCML	116597	Rattus	norvegicus	opioid	binding	protein/cell	adhesion	molecule-like(Opcml)
RBM38	366262	Rattus	norvegicus	RNA	binding	motif	protein	38(Rbm38)
EGFEM1	310269	Rattus	norvegicus	EGF-like	and	EMI	domain	containing	1(Egfem1)
TPBG	83684	Rattus	norvegicus	trophoblast	glycoprotein(Tpbg)
LGI2	305417	Rattus	norvegicus	leucine-rich	repeat	LGI	family,	member	2(Lgi2)
EYA4	292172	Rattus	norvegicus	EYA	transcriptional	coactivator	and	phosphatase	4(Eya4)
PDX1	29535	Rattus	norvegicus	pancreatic	and	duodenal	homeobox	1(Pdx1)
MEIS3	361514	Rattus	norvegicus	Meis	homeobox	3(Meis3)
MAPK15	286997	Rattus	norvegicus	mitogen-activated	protein	kinase	15(Mapk15)
MIR139	100314240	Rattus	norvegicus	microRNA	139(Mir139)
TBX18	315870	Rattus	norvegicus	T-box18(Tbx18)
CD4	24932	Rattus	norvegicus	Cd4	molecule(Cd4)
MLPH	316620	Rattus	norvegicus	melanophilin(Mlph)
SPATA32	287747	Rattus	norvegicus	spermatogenesis	associated	32(Spata32)
NPHS2	170672	Rattus	norvegicus	nephrosis	2,	idiopathic,	steroid-resistant(Nphs2)
ERCC1	292673	Rattus	norvegicus	ERCC	excision	repair	1,	endonuclease	non-catalytic	subunit(Ercc1)
TAF8	316216	Rattus	norvegicus	TATA-box	binding	protein	associated	factor	8(Taf8)
