# Supplementary material for: Male rat leukocyte population dynamics predict a window for intervention in aging
Source: eLife. 2022 May 4;11:e76808. doi: 10.7554/eLife.76808 (PMC9150891; doi:10.7554/eLife.76808)
Supplement: Source data 4. [file elife-76808-data4.xlsx]

## Sheet: Detailed sum
Suppl. Table 4. Go enrichment. Analysis was performed using Gene Ontology (http://geneontology.org/docs/go-enrichment-analysis/)
	GO biological process complete	# of genes in the Rattus norvegicus - REFLIST (out of 21586)	# of genes in gene list	Expected	Fold enrichment	P-value	FDR	Combined score (-log10(FDR)*FC)
YM hyper
Differentiation	regulation of cell population proliferation (GO:0042127)	1730	57	21.64	2.63	2.21e-11	4.41e-08	19.3451
	negative regulation of developmental process (GO:0051093)	975	37	12.2	3.03	3.51e-09	2e-06	17.2679
	multicellular organism development (GO:0007275)	4851	112	60.68	1.85	4.47e-12	2.38e-08	14.1033
	cellular developmental process (GO:0048869)	3515	87	43.97	1.98	1.52e-10	1.1e-07	13.778
	system development (GO:0048731)	4522	105	56.56	1.86	2.98e-11	4.31e-08	13.6999
	cell differentiation (GO:0030154)	3467	86	43.37	1.98	2.02e-10	1.4e-07	13.5707
	developmental process (GO:0032502)	5734	123	71.72	1.71	3.95e-11	4.84e-08	12.5089
	anatomical structure development (GO:0048856)	5256	115	65.74	1.75	7.67e-11	7.19e-08	12.5007
	negative regulation of cell differentiation (GO:0045596)	700	26	8.76	2.97	1.3e-06	0.00031	10.4207
	animal organ development (GO:0048513)	3576	83	44.73	1.86	1.42e-08	6.86e-06	9.60444
	regulation of cell differentiation (GO:0045595)	1619	46	20.25	2.27	3.29e-07	0.000101	9.07019
	cell fate commitment (GO:0045165)	261	12	3.26	3.68	0.00016	0.0201	6.24424
	negative regulation of cell population proliferation (GO:0008285)	721	23	9.02	2.55	5.55e-05	0.0079	5.36105
	tissue development (GO:0009888)	1744	43	21.81	1.97	2.57e-05	0.0041	4.70282
	positive regulation of developmental process (GO:0051094)	1446	35	18.09	1.94	0.000212	0.0254	3.09462
Apoptosis regulation	negative regulation of apoptotic process involved in development (GO:1904746)	8	3	0.1	29.98	0.000286	0.0328	44.4941
	regulation of programmed cell death (GO:0043067)	1537	42	19.22	2.18	2.36e-06	0.000495	7.20576
	regulation of apoptotic process (GO:0042981)	1504	41	18.81	2.18	3.4e-06	0.000669	6.92057
	regulation of cell death (GO:0010941)	1706	43	21.34	2.02	1.31e-05	0.00241	5.28833
	negative regulation of programmed cell death (GO:0043069)	975	26	12.2	2.13	0.000344	0.0383	3.01779
T cell activation	regulation of T cell receptor signaling pathway (GO:0050856)	44	6	0.55	10.9	3.39e-05	0.00514	24.9505
	negative regulation of alpha-beta T cell activation (GO:0046636)	43	5	0.54	9.3	0.000308	0.035	13.5402
	regulation of antigen receptor-mediated signaling pathway (GO:0050854)	62	6	0.78	7.74	0.000194	0.0236	12.5937
	regulation of antigen receptor-mediated signaling pathway (GO:0050854)	94	7	1.18	5.95	0.00026	0.0303	9.03542
	regulation of immune system process (GO:0002682)	1481	42	18.52	2.27	8.58e-07	0.000224	8.28494
	positive regulation of T cell activation (GO:0050870)	209	10	2.61	3.83	0.000416	0.0445	5.17678
	regulation of leukocyte activation (GO:0002694)	657	21	8.22	2.56	0.000114	0.0147	4.69167
	regulation of T cell activation (GO:0050863)	331	13	4.14	3.14	0.000377	0.0414	4.34262
	cell surface receptor signaling pathway (GO:0007166)	1832	44	22.91	1.92	3.94e-05	0.00593	4.27573
Resonse to hypoxia	response to decreased oxygen levels (GO:0036293)	437	18	5.47	3.29	1.6e-05	0.0028	8.39885
	response to hypoxia (GO:0001666)	416	17	5.2	3.27	3.04e-05	0.0047	7.61224
	response to oxygen levels (GO:0070482)	478	18	5.98	3.01	4.96e-05	0.00725	6.44038
	response to oxygen-containing compound (GO:1901700)	2043	49	25.55	1.92	1.44e-05	0.00261	4.96005
Response to immune response	multicellular organismal response to stress (GO:0033555)	102	7	1.28	5.49	0.000414	0.0446	7.41515
	response to lipid (GO:0033993)	1204	33	15.06	2.19	2.9e-05	0.00454	5.13105
	cellular response to cytokine stimulus (GO:0071345)	797	23	9.97	2.31	0.000263	0.0304	3.50456
	response to cytokine (GO:0034097)	935	26	11.7	2.22	0.000228	0.0269	3.48595
	regulation of immune response (GO:0050776)	919	25	11.49	2.17	0.000379	0.0411	3.00796
MO hyper
regulation of proliferation	positive regulation of cell population proliferation (GO:0008284)	1020	25	11.58	2.16	0.00039	0.0285	3.33754
	negative regulation of cell population proliferation (GO:0008285)	721	25	8.18	3.05	1.19e-06	0.000172	11.4816
	regulation of cell population proliferation (GO:0042127)	1730	51	19.64	2.6	3.88e-10	1.55e-07	17.7051
Differentiation	cell fate specification (GO:0001708)	85	10	0.96	10.37	1.16e-07	2e-05	48.7283
	cell fate commitment (GO:0045165)	261	20	2.96	6.75	6.68e-11	3.44e-08	50.3782
	stem cell differentiation (GO:0048863)	175	9	1.99	4.53	0.000243	0.0199	7.7062
	cell morphogenesis involved in differentiation (GO:0000904)	582	26	6.61	3.94	5.96e-09	1.53e-06	22.9123
	developmental growth (GO:0048589)	474	20	5.38	3.72	8.67e-07	0.000128	14.4812
	growth (GO:0040007)	478	20	5.43	3.69	9.82e-07	0.000144	14.1756
	cellular component morphogenesis (GO:0032989)	626	25	7.11	3.52	9.58e-08	1.73e-05	16.7621
	cell morphogenesis (GO:0000902)	755	30	8.57	3.5	5.04e-09	1.34e-06	20.5551
	taxis (GO:0042330)	482	19	5.47	3.47	4.25e-06	0.000555	11.2973
	negative regulation of cell differentiation (GO:0045596)	700	25	7.94	3.15	7.12e-07	0.000107	12.5074
	negative regulation of developmental process (GO:0051093)	975	30	11.07	2.71	1.08e-06	0.000157	10.3091
	cell development (GO:0048468)	1814	55	20.59	2.67	2.34e-11	1.49e-08	20.8976
	tissue development (GO:0009888)	1744	50	19.79	2.53	2.17e-09	6.29e-07	15.6894
	regulation of cell development (GO:0060284)	596	17	6.76	2.51	0.000596	0.0401	3.50611
	regulation of cell differentiation (GO:0045595)	1619	46	18.38	2.5	1.35e-08	3.21e-06	13.7337
	positive regulation of cell differentiation (GO:0045597)	946	25	10.74	2.33	0.000116	0.0102	4.63996
	positive regulation of developmental process (GO:0051094)	1446	37	16.41	2.25	4.54e-06	0.000588	7.2689
	cell differentiation (GO:0030154)	3467	87	39.35	2.21	1.77e-13	3.13e-10	21.0048
	cellular developmental process (GO:0048869)	3515	88	39.9	2.21	1.3e-13	2.58e-10	21.1903
	regulation of developmental process (GO:0050793)	2541	61	28.84	2.12	1.46e-08	3.41e-06	11.5906
	developmental process (GO:0032502)	5734	127	65.08	1.95	1.15e-16	4.6e-13	24.0576
T cell receptor signaling pathway	regulation of T cell receptor signaling pathway (GO:0050856)	44	5	0.5	10.01	0.000218	0.0182	17.4167
	regulation of T cell activation (GO:0050863)	331	13	3.76	3.46	0.000148	0.0128	6.54905
Notch signaling pathway	Notch signaling pathway (GO:0007219)	113	7	1.28	5.46	0.000418	0.03	8.31492
regulation of leukocyte activation and adhesion	cell-cell adhesion via plasma-membrane adhesion molecules (GO:0098742)	216	13	2.45	5.3	2.07e-06	0.000282	18.8137
	homophilic cell adhesion via plasma membrane adhesion molecules (GO:0007156)	136	8	1.54	5.18	0.000228	0.0188	8.93986
	negative regulation of cell activation (GO:0050866)	222	10	2.52	3.97	0.000307	0.024	6.43056
	negative regulation of leukocyte activation (GO:0002695)	201	9	2.28	3.95	0.000637	0.0421	5.43409
	regulation of cell-cell adhesion (GO:0022407)	446	18	5.06	3.56	5.61e-06	0.000715	11.1987
	regulation of leukocyte cell-cell adhesion (GO:1903037)	324	13	3.68	3.54	0.000121	0.0106	6.99042
	chemotaxis (GO:0006935)	477	19	5.41	3.51	3.68e-06	0.000488	11.6236
	cell-cell adhesion (GO:0098609)	447	17	5.07	3.35	2.14e-05	0.0023	8.83821
	negative regulation of cell adhesion (GO:0007162)	297	11	3.37	3.26	0.00076	0.0481	4.29621
	negative regulation of immune system process (GO:0002683)	446	14	5.06	2.77	0.000744	0.0474	3.66809
	cell adhesion (GO:0007155)	788	24	8.94	2.68	1.63e-05	0.00185	7.32398
	biological adhesion (GO:0022610)	797	24	9.05	2.65	1.95e-05	0.00213	7.07979
	regulation of cell activation (GO:0050865)	701	20	7.96	2.51	0.000197	0.0167	4.46098
	locomotion (GO:0040011)	1232	34	13.98	2.43	2.51e-06	0.00034	8.42851
	regulation of cell adhesion (GO:0030155)	762	21	8.65	2.43	0.000339	0.0259	3.85568
	regulation of leukocyte activation (GO:0002694)	657	18	7.46	2.41	0.000652	0.0429	3.29578
	cell migration (GO:0016477)	883	23	10.02	2.29	0.000268	0.0212	3.83269
	localization of cell (GO:0051674)	1033	25	11.72	2.13	0.000443	0.0316	3.19567
	cell motility (GO:0048870)	1033	25	11.72	2.13	0.000443	0.0315	3.1986
	cell surface receptor signaling pathway (GO:0007166)	1832	38	20.79	1.83	0.000322	0.0249	2.93496
	regulation of cell communication (GO:0010646)	3311	63	37.58	1.68	3.6e-05	0.00366	4.09335
	regulation of signaling (GO:0023051)	3323	63	37.72	1.67	3.71e-05	0.00374	4.0533
	regulation of localization (GO:0032879)	2954	56	33.53	1.67	0.000115	0.0102	3.32564
	regulation of response to stimulus (GO:0048583)	3847	66	43.66	1.51	0.00041	0.0297	2.30614
YM hypo
B cell differentiation	B cell differentiation (GO:0030183)	115	8	1.58	5.07	0.000274	0.037	7.25922
Glycolysis	canonical glycolysis (GO:0061621)	7	3	0.1	31.25	0.000274	0.0361	45.0779
	glucose catabolic process (GO:0006007)	12	4	0.16	24.31	5.25e-05	0.0103	48.3079
	NAD metabolic process (GO:0019674)	18	4	0.25	16.21	0.000198	0.0287	24.9977
	monosaccharide catabolic process (GO:0046365)	21	4	0.29	13.89	0.000332	0.0395	19.4933
	glucose catabolic process to pyruvate (GO:0061718)	7	3	0.1	31.25	0.000274	0.0364	44.9656
Granulocyte differentiation	granulocyte differentiation (GO:0030851)	25	6	0.34	17.5	3.23e-06	0.00147	49.5719
Regulation of differentiation	leukocyte differentiation (GO:0002521)	381	18	5.22	3.45	9.36e-06	0.00332	8.55207
	positive regulation of cell differentiation (GO:0045597)	946	30	12.97	2.31	2.72e-05	0.00689	4.99371
	regulation of cell differentiation (GO:0045595)	1619	44	22.2	1.98	1.95e-05	0.00587	4.4181
	cell differentiation (GO:0030154)	3467	78	47.54	1.64	7.35e-06	0.00286	4.17156
Negative regulation of adhesion	negative regulation of cell-cell adhesion (GO:0022408)	198	12	2.72	4.42	3.1e-05	0.0075	9.39223
	negative regulation of cell adhesion (GO:0007162)	297	14	4.07	3.44	9.45e-05	0.0157	6.20611
	regulation of cell adhesion (GO:0030155)	762	26	10.45	2.49	4.64e-05	0.0096	5.02414
	regulation of cell-cell adhesion (GO:0022407)	446	21	6.12	3.43	1.76e-06	0.00104	10.2316
Positive regulation of inflammatory response	positive regulation of inflammatory response (GO:0050729)	139	9	1.91	4.72	0.000191	0.0284	7.30034
Regulation of phagocytosis	regulation of phagocytosis, engulfment (GO:0060099)	20	4	0.27	14.59	0.000282	0.0368	20.9243
Leukocyte chemotaxis	leukocyte chemotaxis involved in inflammatory response (GO:0002232)	8	3	0.11	27.35	0.000373	0.0419	37.6824
	leukocyte migration involved in inflammatory response (GO:0002523)	32	5	0.44	11.39	0.000134	0.0211	19.0864
MO hypo
No enrichment
