# Supplementary material for: Male rat leukocyte population dynamics predict a window for intervention in aging
Source: eLife journal article supplement (doi:10.7554/elife.76808), 2022-05-04
Supplement: supp [file elife-76808-supp-v1.zip]

Figure 3 – Figure supplement 1

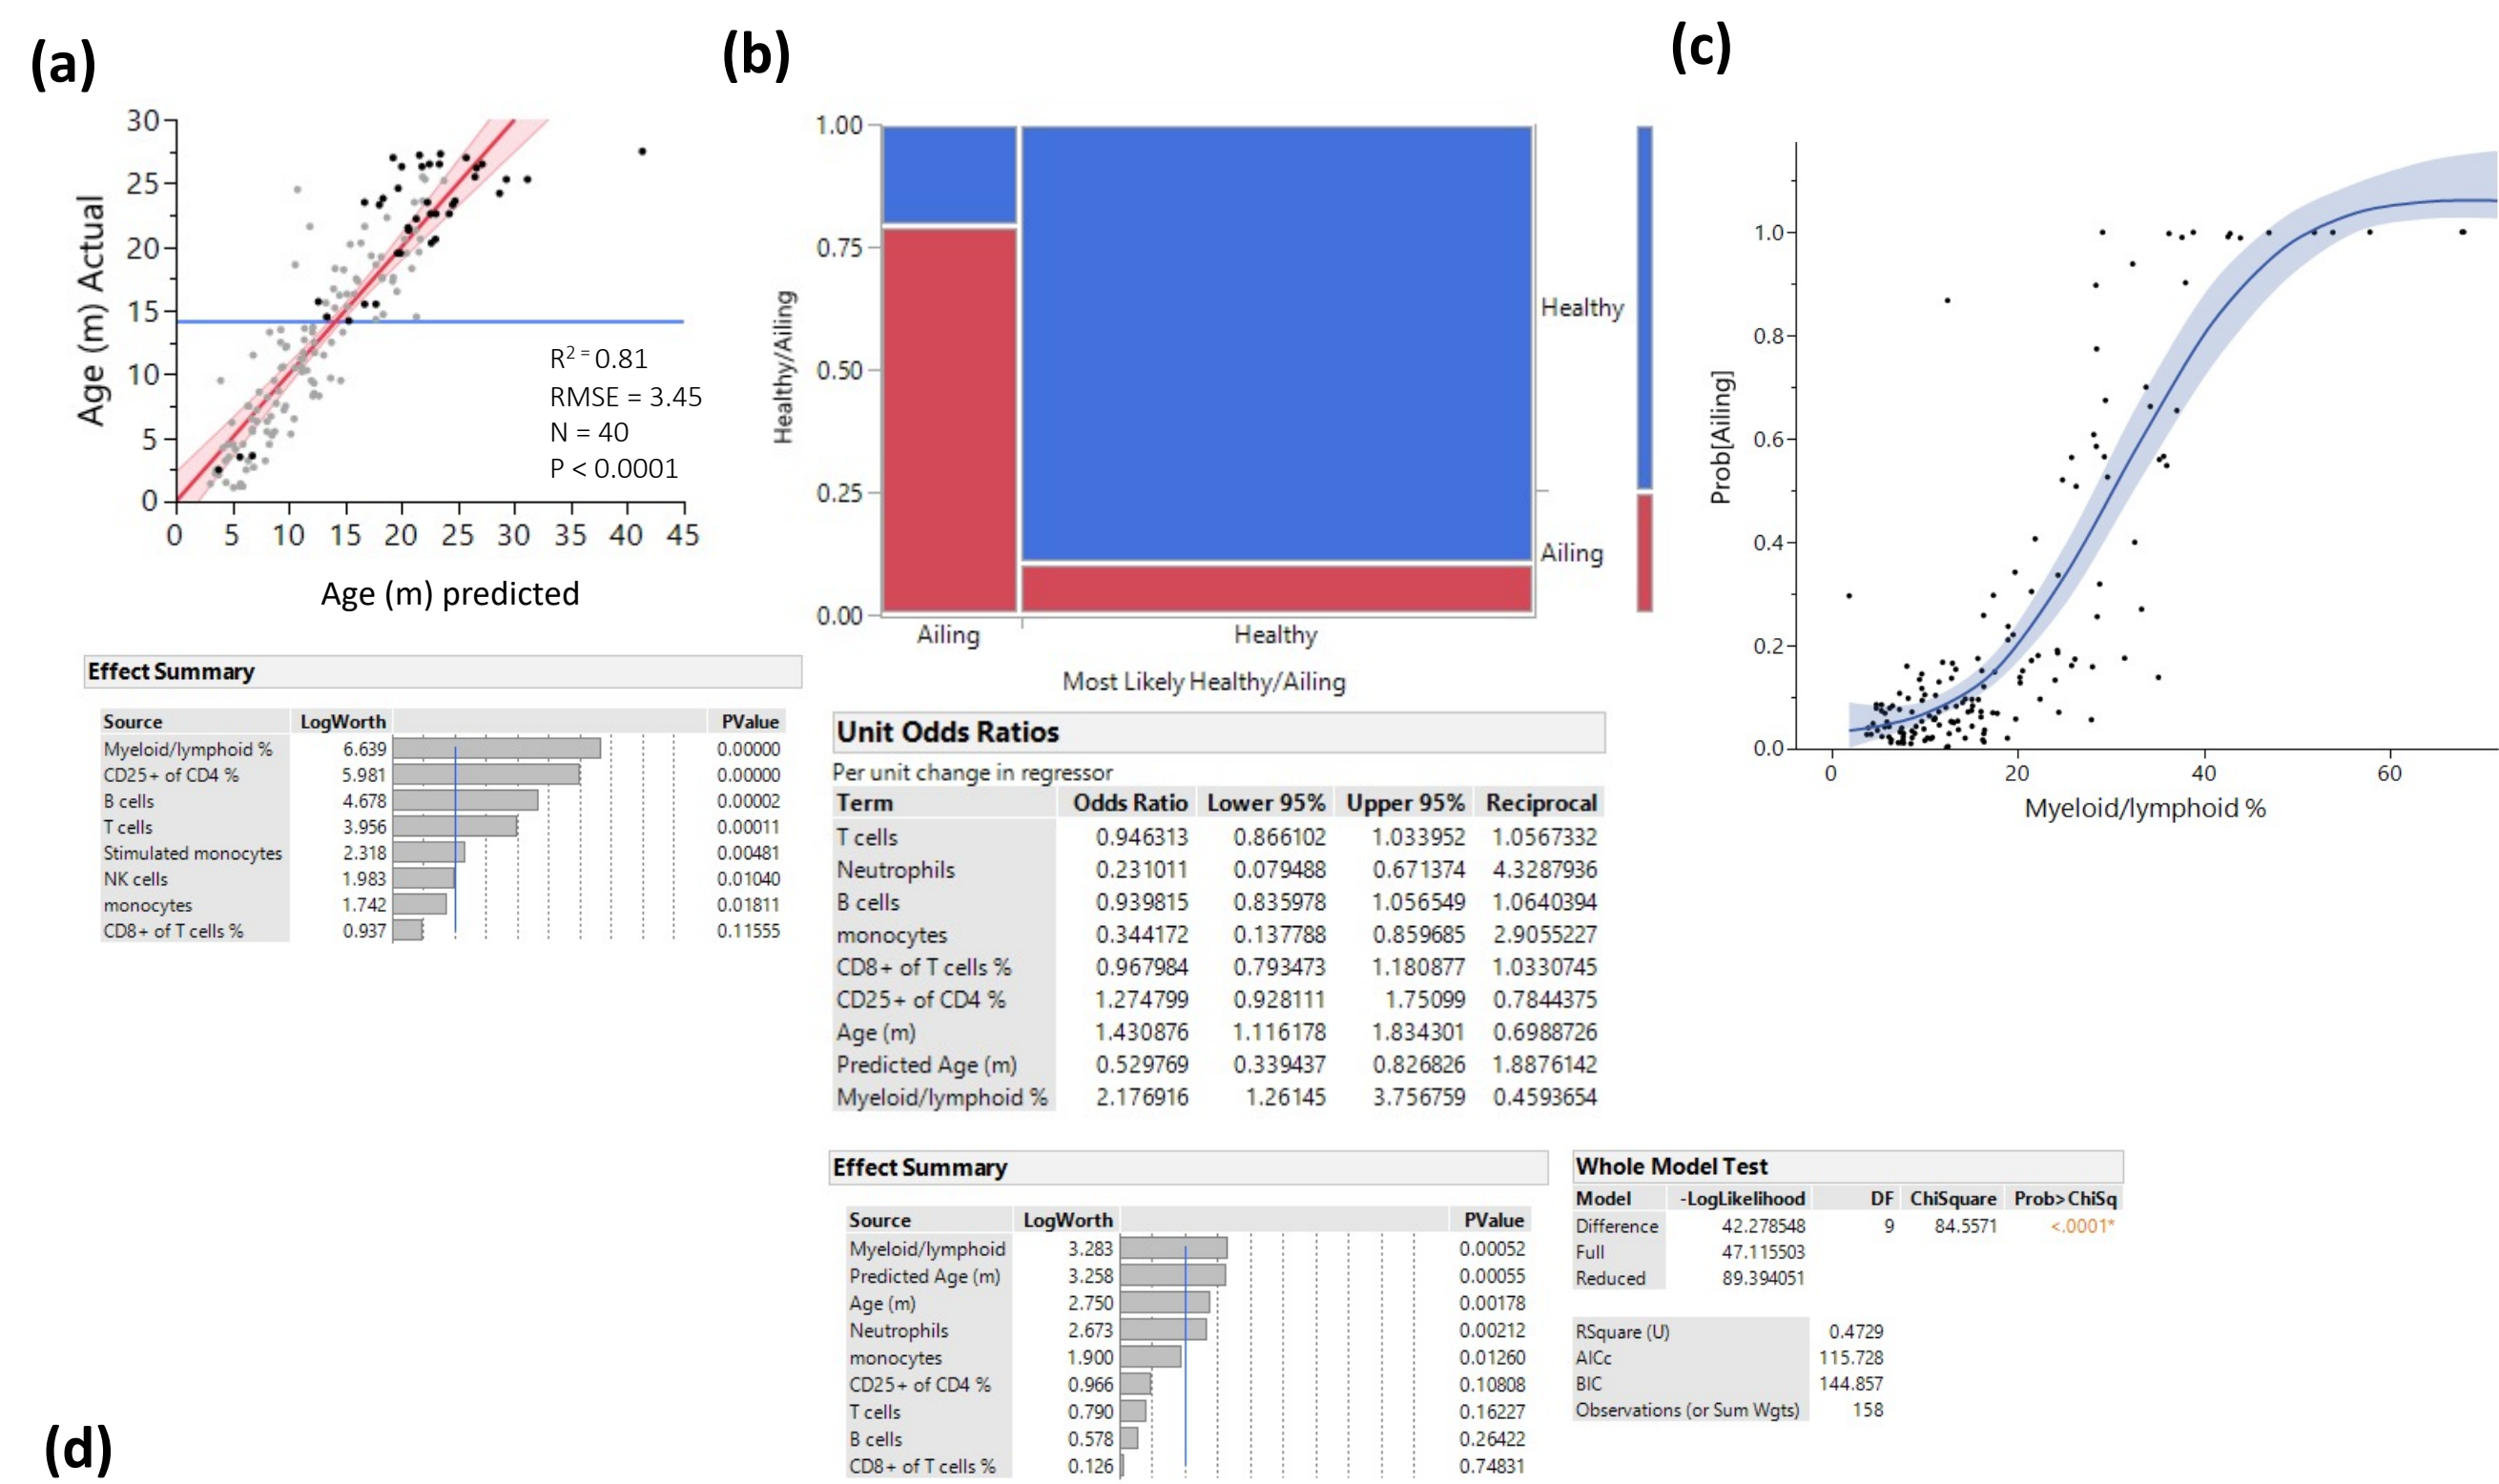

(d)

$Predicted\ age = 1.8277 + 0.902 \times Freq\ of\ CD25 + among\ CD4 + T\ cells + 1.3337 \times Freq\ of\ stimulated\ monocytes + 0.4118 \times Freq\ of\ NK\ cells + 0.1452 \times Freq\ of\ monocytes + 0.0726 \times Freq\ of\ T\ cells + -0.2796 \times Freq\ of\ CD8^+ cells\ among\ T\ cells$
