# Supplementary figures and images for: Male rat leukocyte population dynamics predict a window for intervention in aging
Source: eLife journal article supplement (doi:10.7554/elife.76808), 2022-05-04

Figure 5 – Figure supplement 1

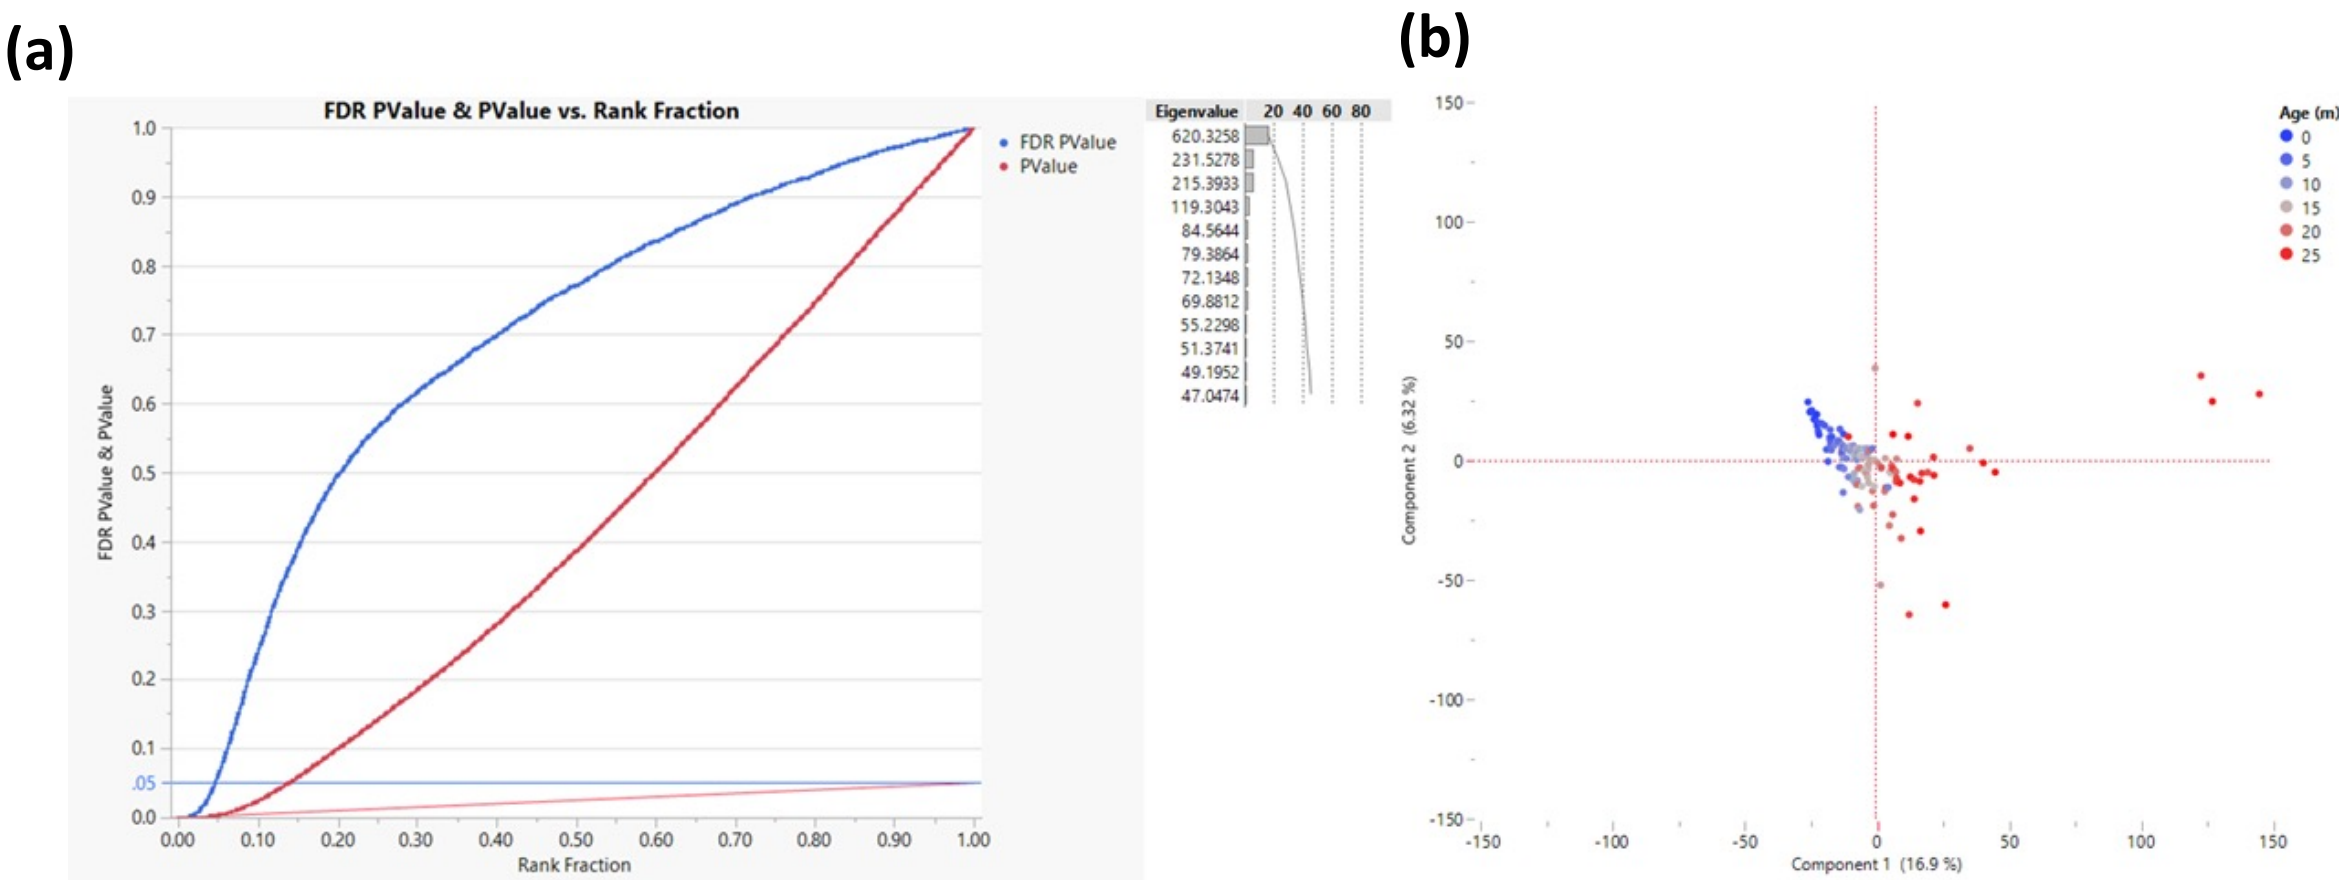

Supplement: supp [file elife-76808-supp-v1.zip]

Figure 6 – Figure supplement 1

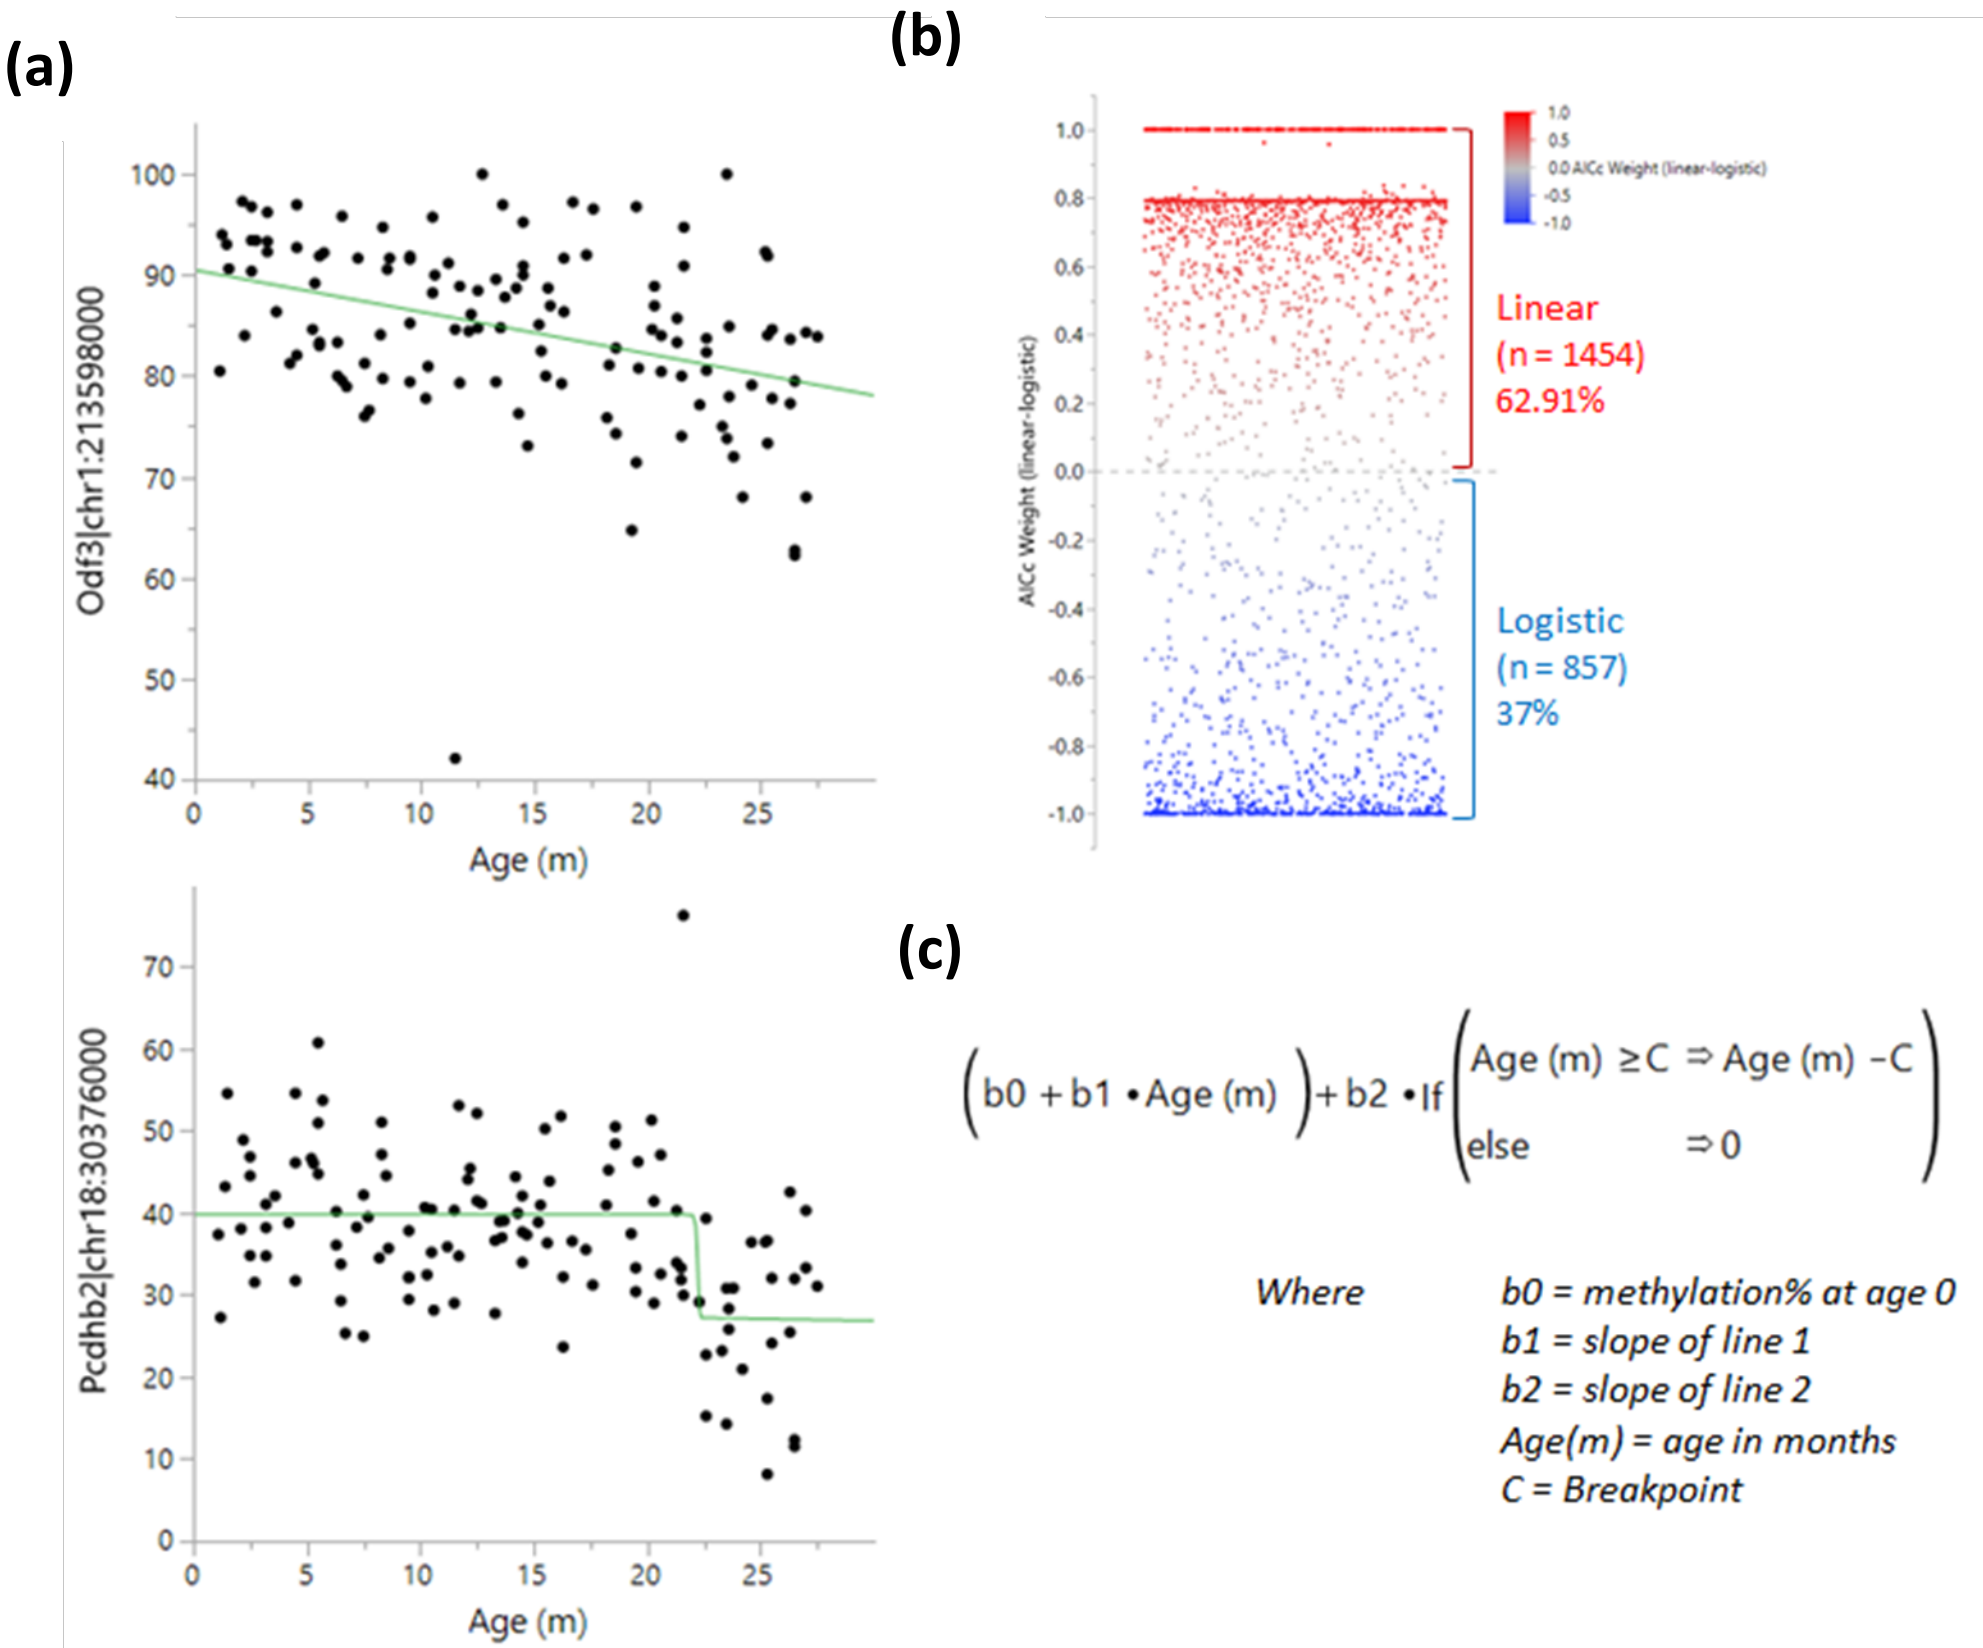

Supplement: supp [file elife-76808-supp-v1.zip]

Figure 3 – Figure supplement 2

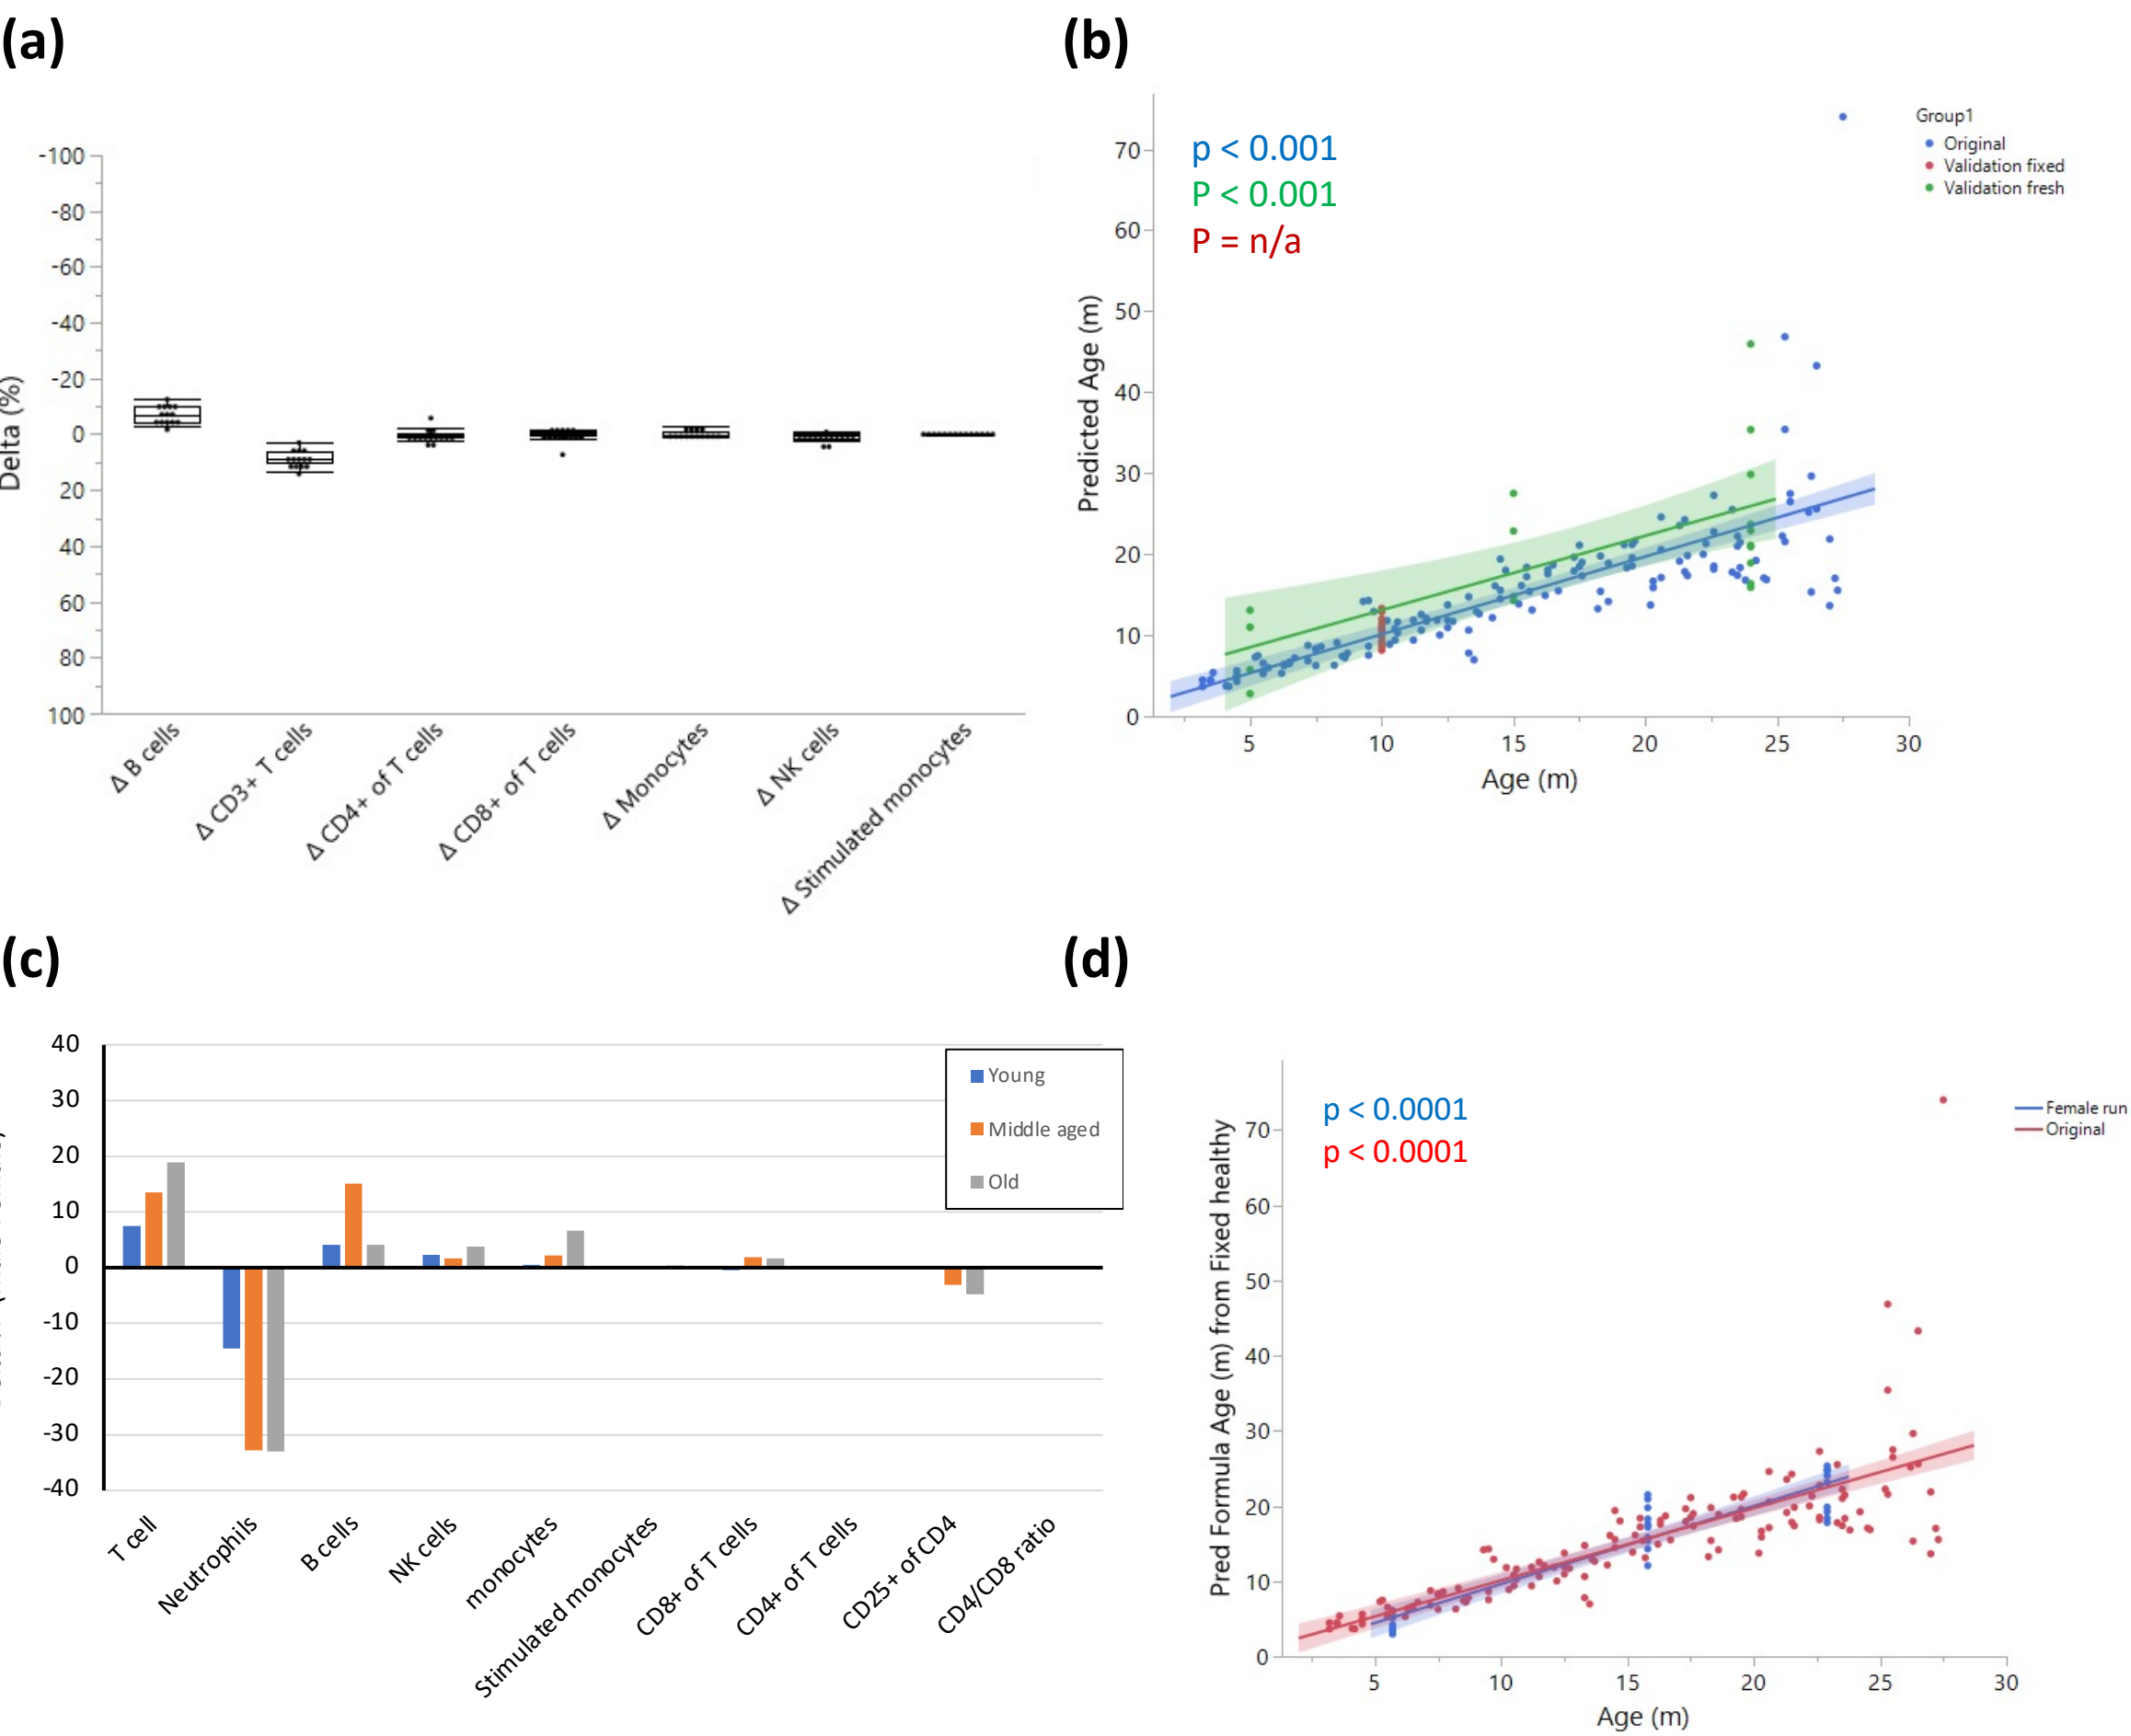

Supplement: supp [file elife-76808-supp-v1.zip]

Figure 4 – Figure supplement 1

(a)

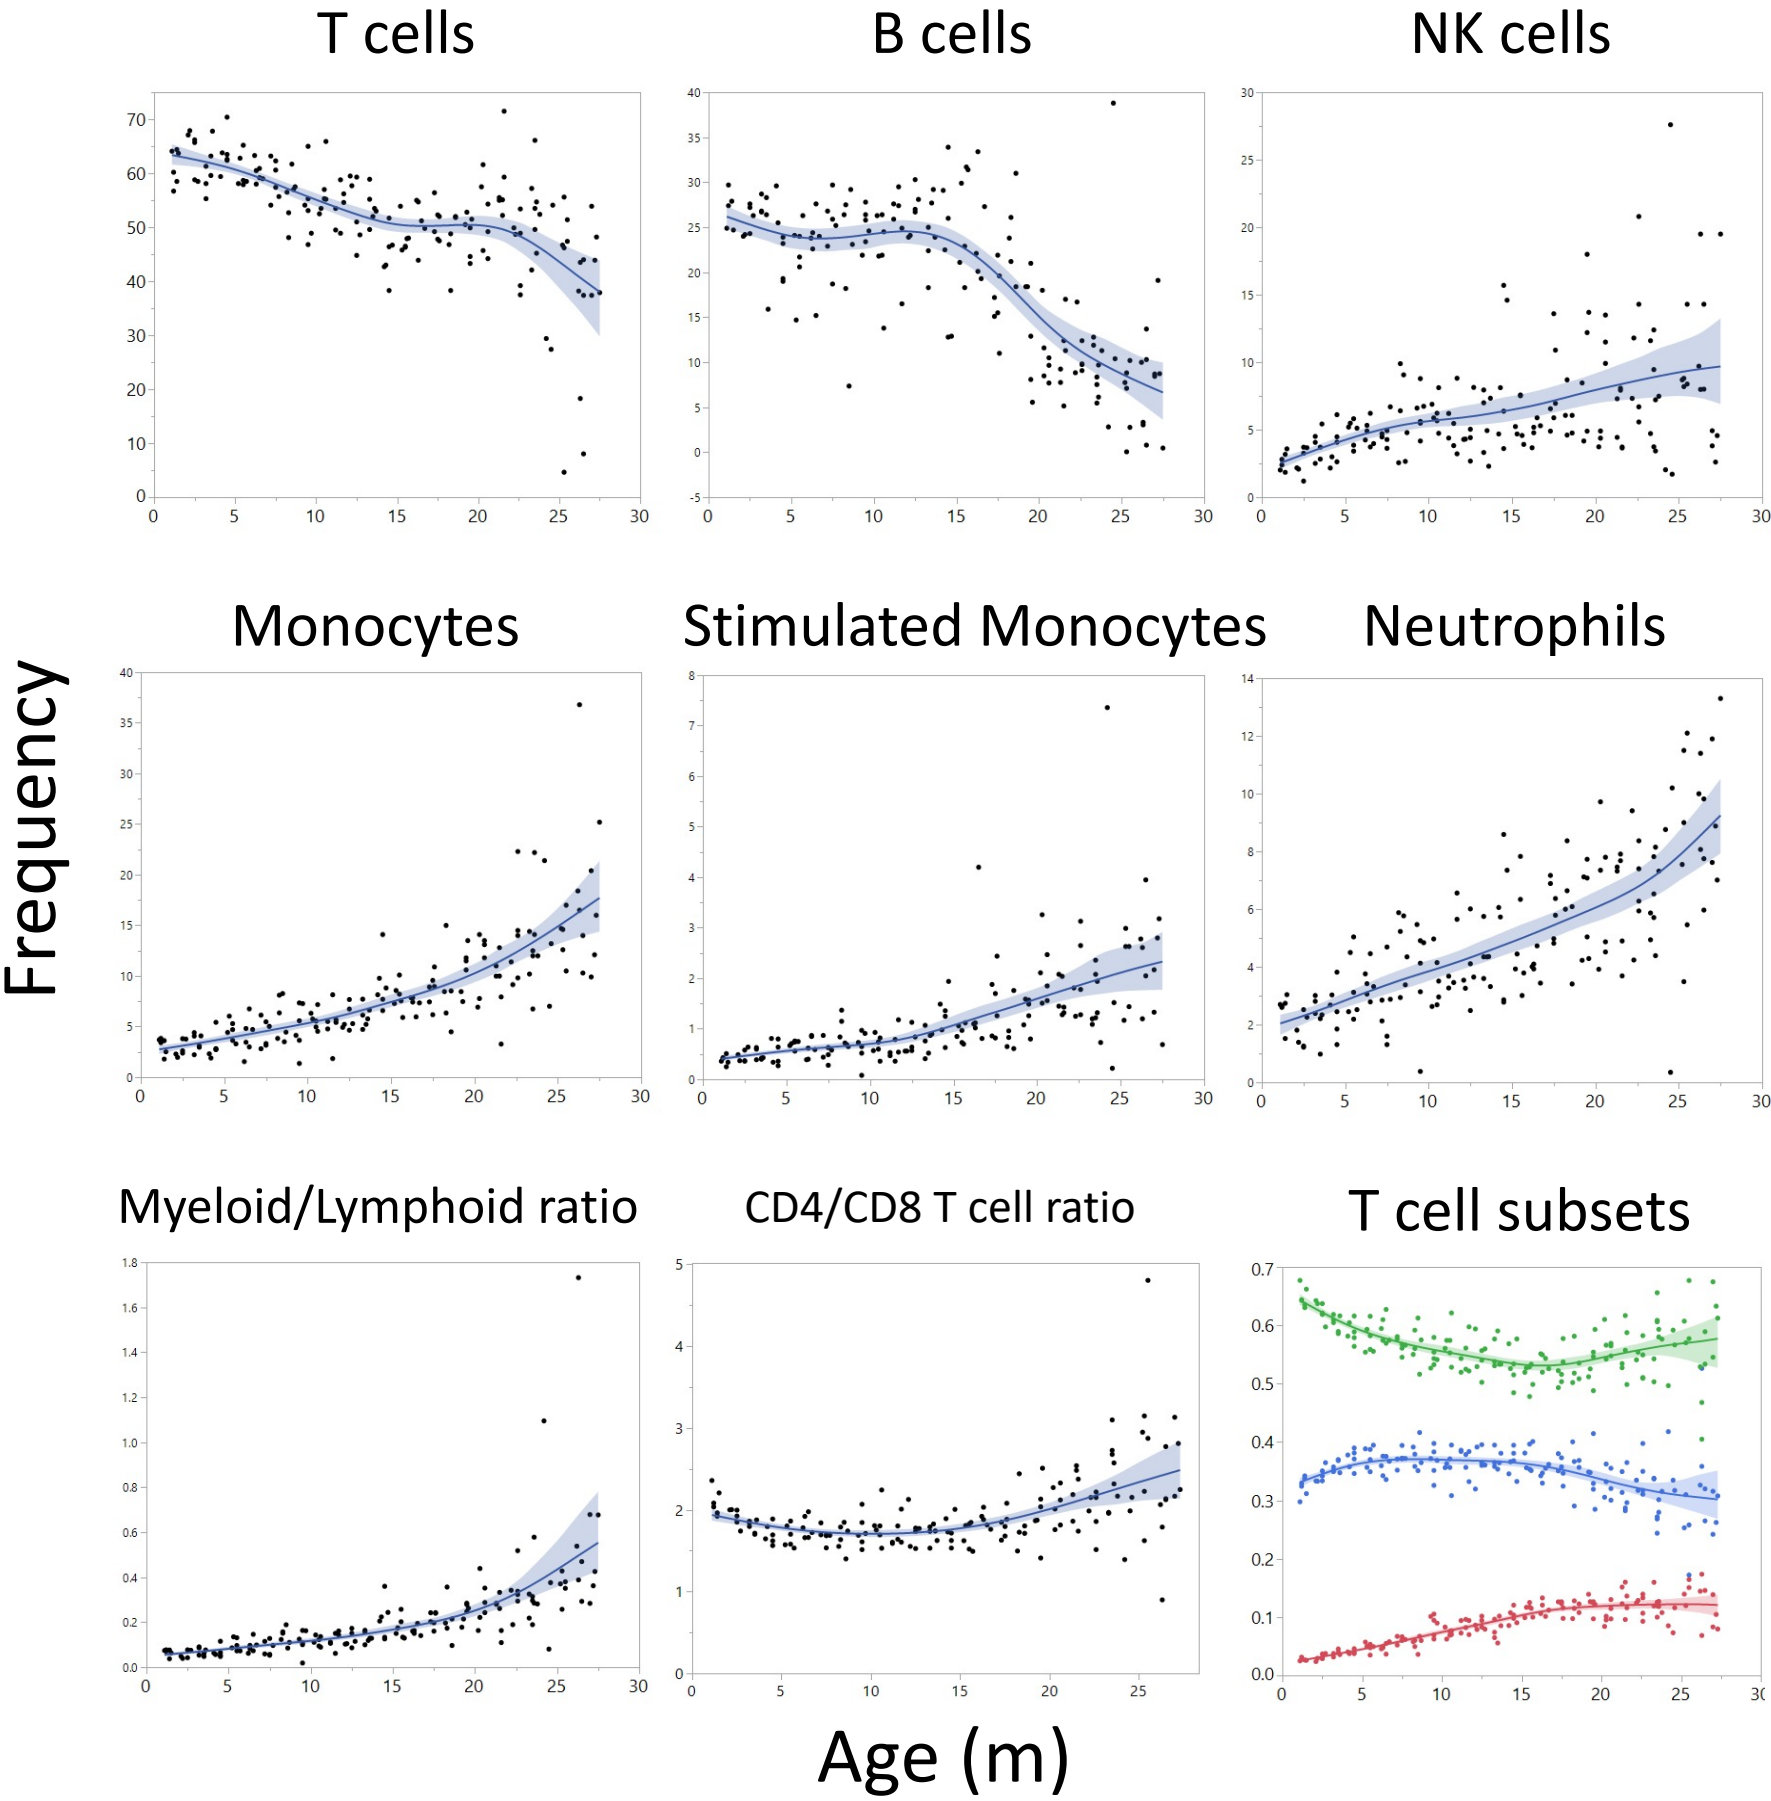

(b)

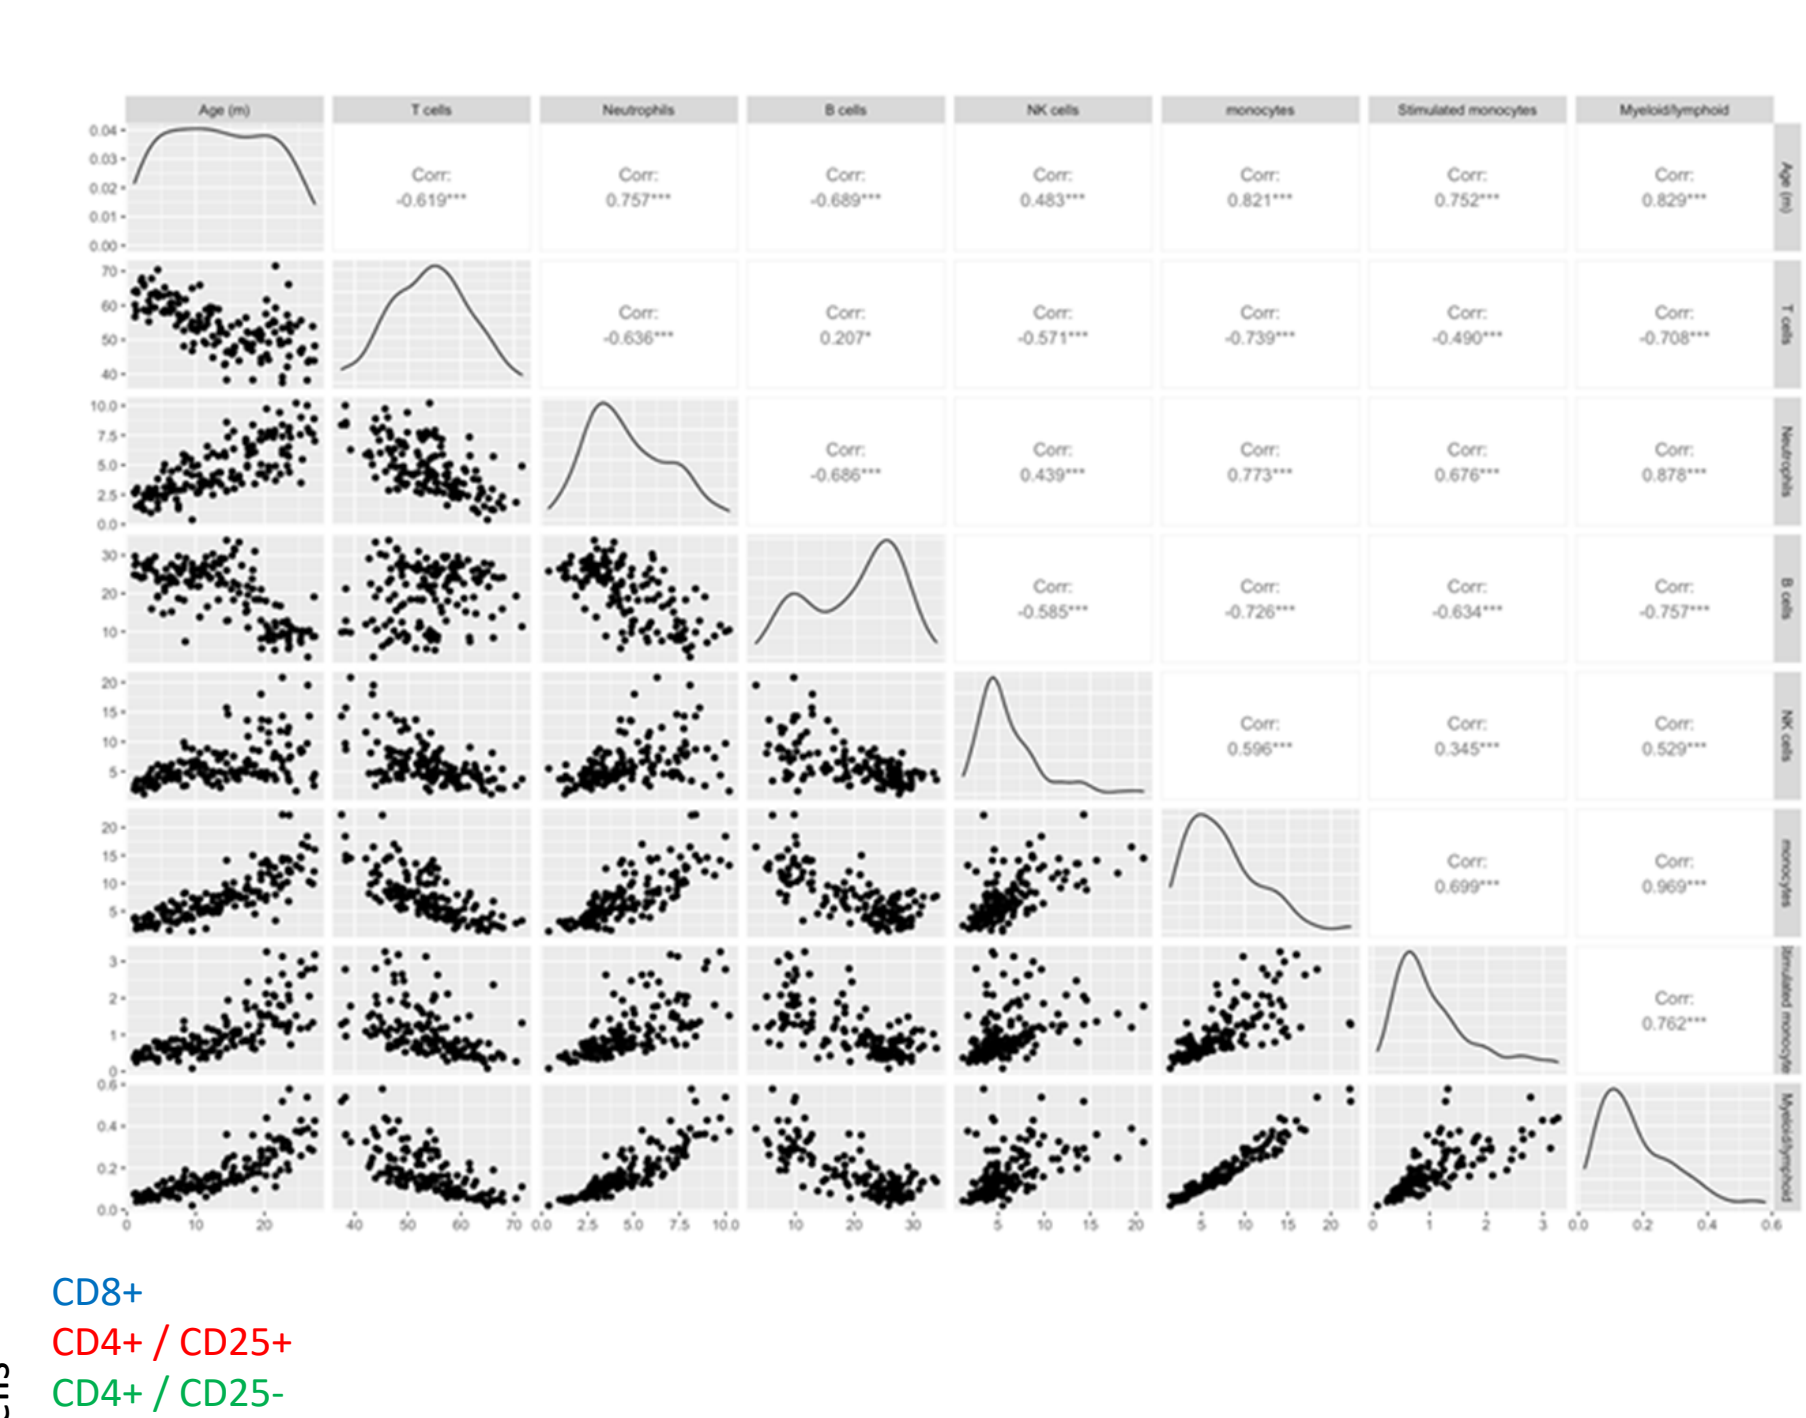

Supplement: supp [file elife-76808-supp-v1.zip]

Figure 1 – Figure supplement 2

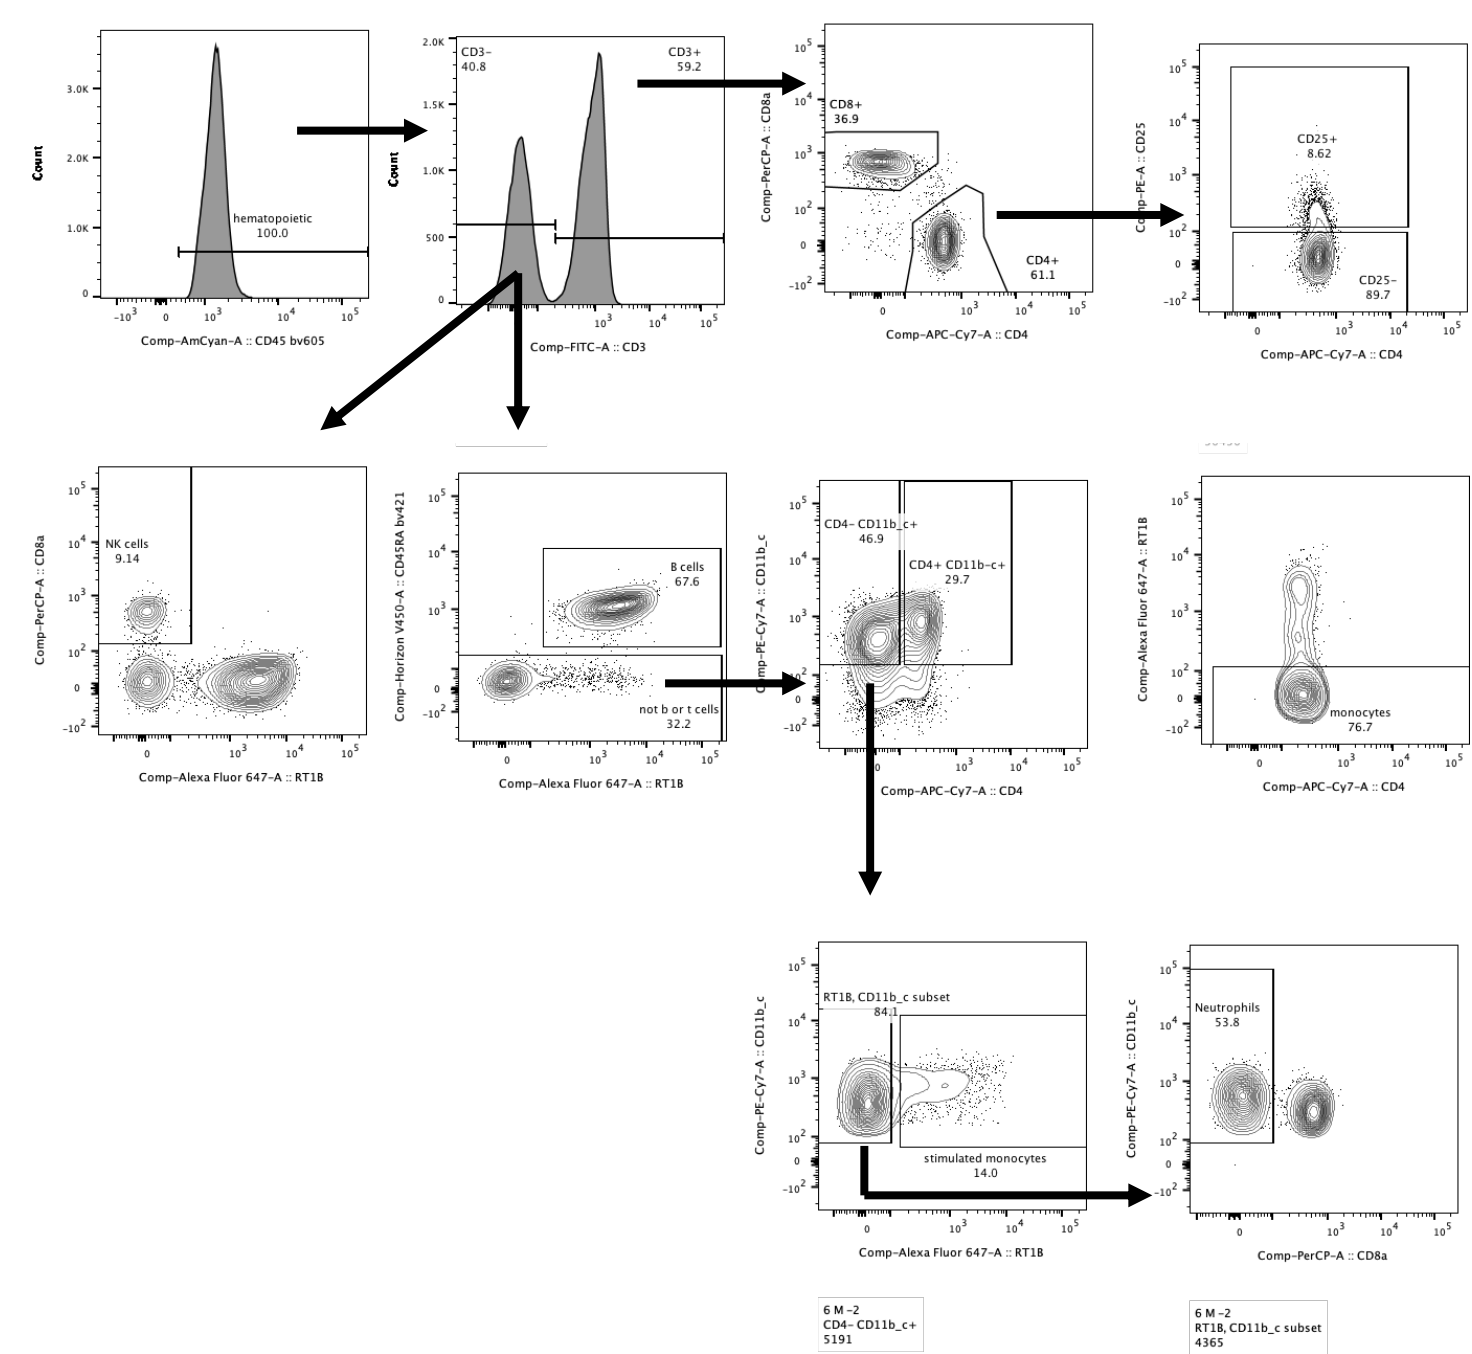

Supplement: supp [file elife-76808-supp-v1.zip]

Figure 1 – Figure supplement 1

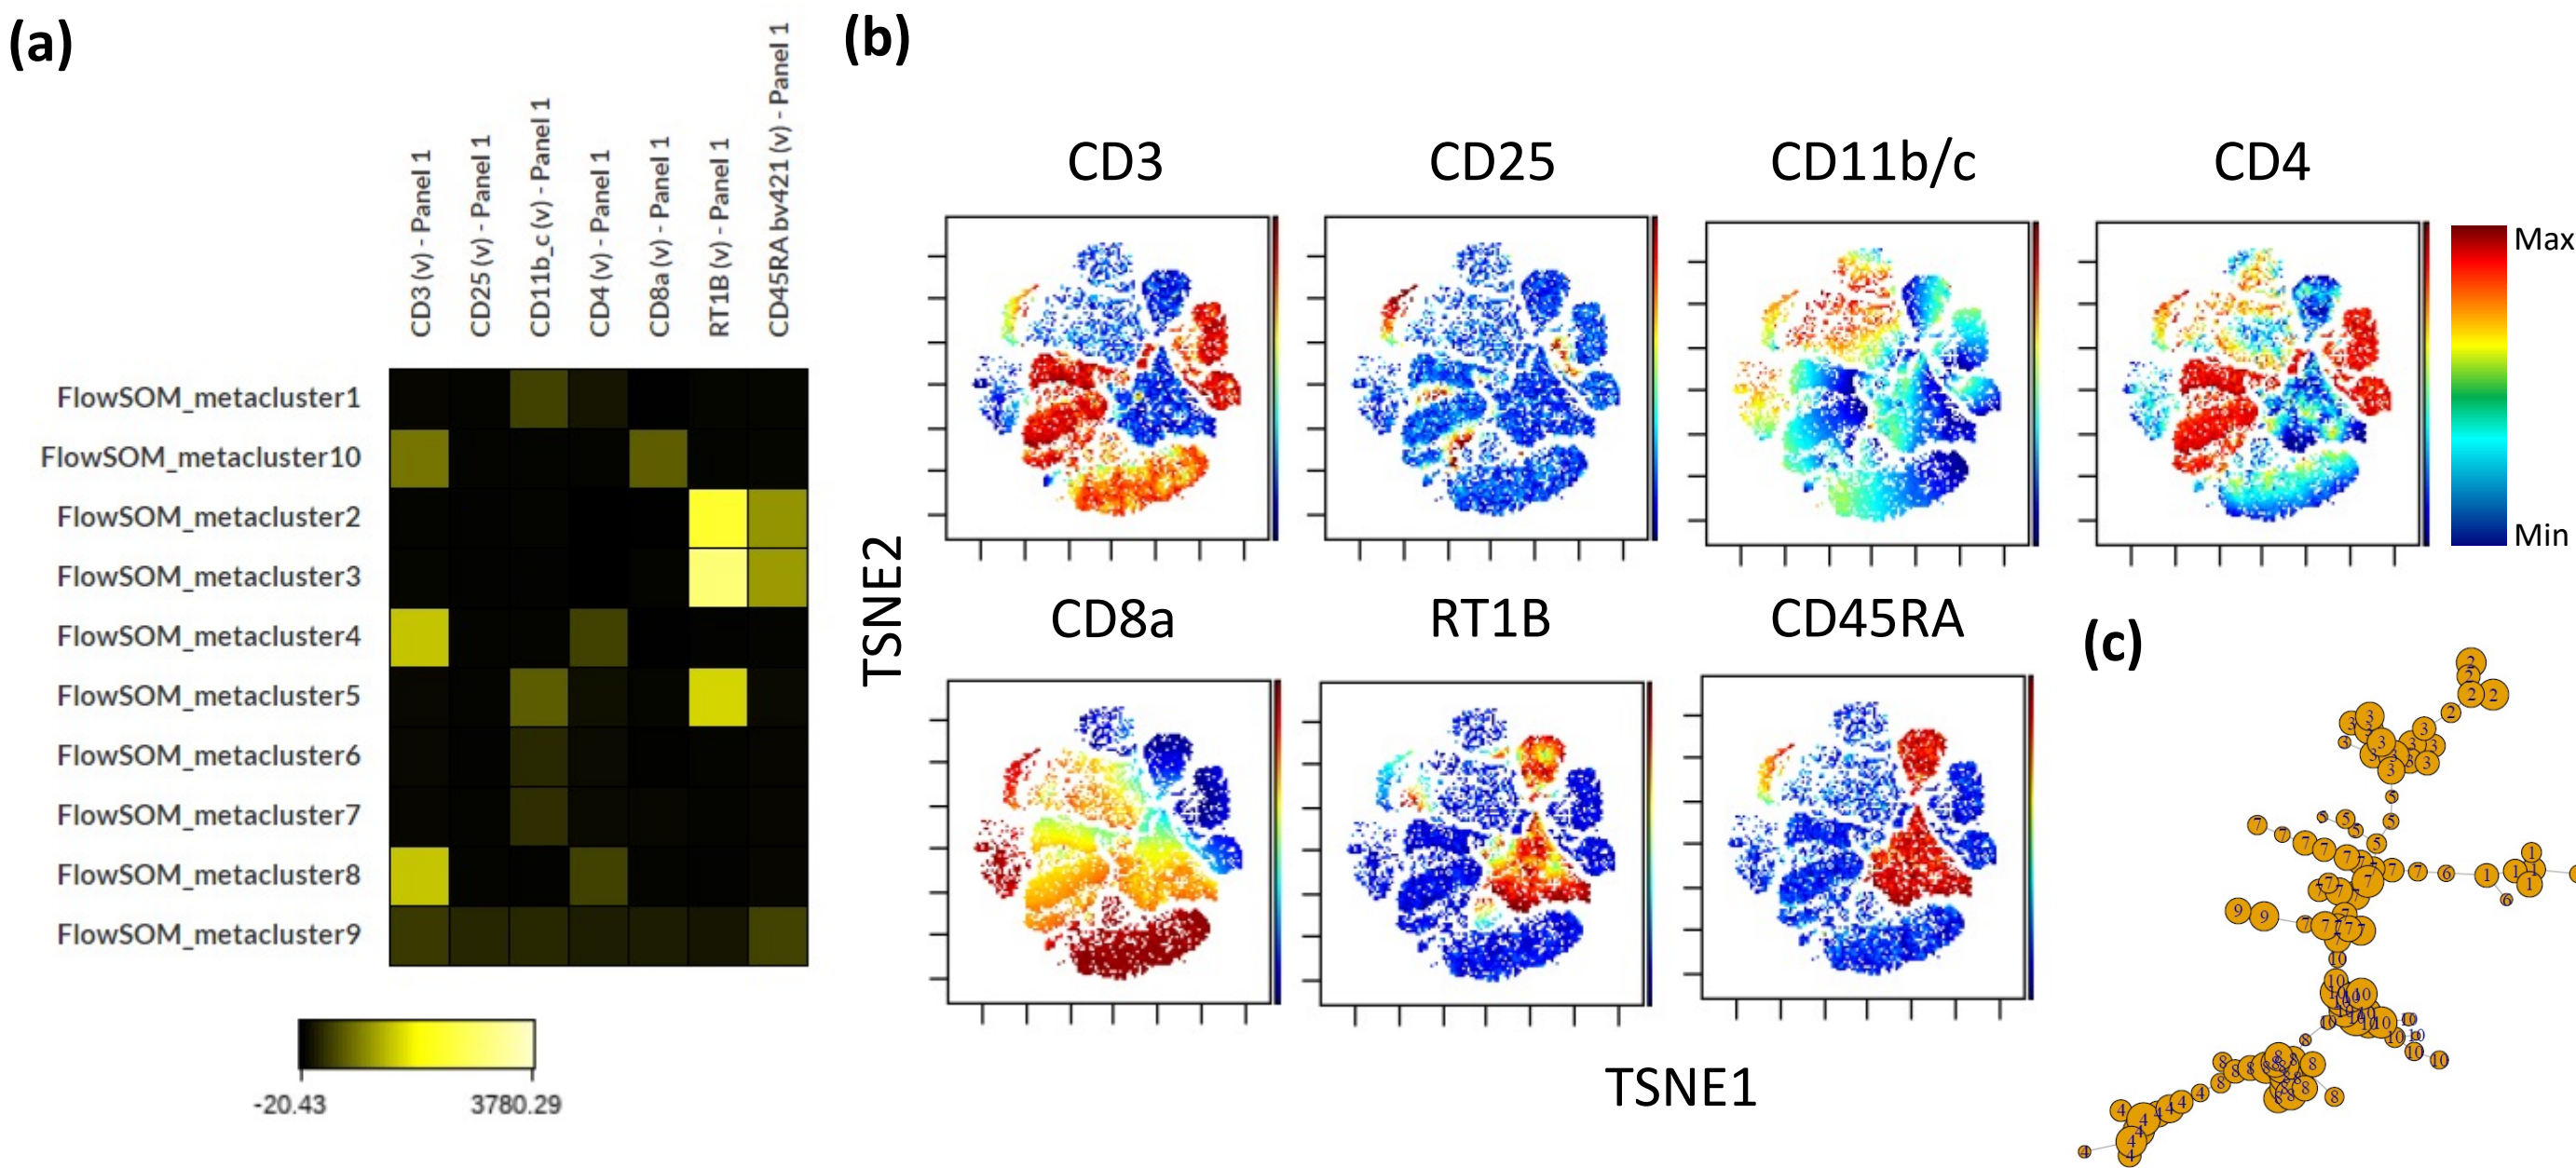

Supplement: supp [file elife-76808-supp-v1.zip]
